# Supplementary material
Source: publisher figshare collection journal article supplement (https://gsajournals.figshare.com/ndownloader/files/25800116)
Supplement: Supplementary file 1 [file 25800116]

## Sheet: Sheet1
ID	72h_whole_animal	96h_whole_animal	120h_whole_animal	96h_antenna	120h_antenna_1	72h_eye_antenna_mouthpart	72h_eye_antenna	96h_eye_antenna	120h_eye_antenna	prepupa_eye_antenna_2	96h_eye	120h_eye	Cluster
FBgn0027561	12.7279	14.9576	29.4554	13.1497	14.0038	19.0521	14.8768	15.7661	18.35	37.5927	16.7283	17.4628	1
FBgn0262350	6.23327	2.51208	6.58326	4.06703	2.0435	6.05026	2.70848	1.43318	1.64923	4.40032	1.09093	2.50929	1
FBgn0085387	2.02271	1.5241	1.24176	0.813637	2.31061	4.4326	3.31364	0.904987	0.690146	3.22626	0.357728	0.643754	1
FBgn0003048	2.97119	3.65178	7.08517	6.82228	6.51063	6.926	7.23772	7.49741	8.63843	9.99379	8.30156	6.03987	1
FBgn0035293	5.91968	5.18761	5.33083	6.25989	5.54695	9.21368	6.76337	3.70123	3.68353	10.7156	2.53217	6.06631	1
FBgn0261020	54.0058	39.9649	52.6369	40.6194	47.2619	32.926	40.9252	41.0562	42.5524	68.9112	34.2783	48.5042	1
FBgn0031971	36.0951	314.724	686.924	114.491	99.201	192.844	120.419	90.3507	97.7511	167.397	77.0607	73.0141	1
FBgn0040102	1.89755	4.31605	8.03182	2.2144	3.22409	1.83497	2.22376	1.72964	4.78943	7.30751	3.46698	3.08553	1
FBgn0260857	89.7798	62.8959	74.8176	85.0393	83.522	69.6241	79.4152	62.4381	82.4313	115.52	67.1606	79.0387	1
FBgn0050172	10.0028	22.2426	23.8551	6.49381	0.969304	37.1509	12.843	8.8179	0.681784	16.6481	3.51327	6.78149	1
FBgn0020647	8.10663	11.2772	27.9589	9.28793	11.4849	10.1726	10.5723	10.7382	11.804	17.9985	10.9241	10.6762	1
FBgn0028419	119.028	63.683	98.9608	98.5637	96.404	88.8656	88.8555	87.8958	100.187	125.43	104.214	88.7444	1
FBgn0052103	42.4582	50.2451	67.1801	30.4867	28.2941	41.5702	35.7203	28.08	30.1	35.3354	30.8198	23.9304	1
FBgn0025687	34.1137	14.2099	12.8634	2.75886	3.63887	4.82883	3.49745	2.76813	5.33034	6.65316	5.17538	3.39865	1
FBgn0037979	5.72915	6.8085	11.4606	8.19474	7.98104	8.08385	7.98377	9.31972	7.80185	10.3083	8.34535	8.4454	1
FBgn0050344	7.65726	14.568	39.094	7.0241	8.13728	8.59852	7.79369	7.75082	8.05989	12.3961	9.23446	7.7279	1
FBgn0065032	37.3842	30.5237	43.264	3.74457	3.37577	9.12343	3.6663	1.83757	4.38802	10.7011	4.39909	4.59755	1
FBgn0085235	0.0565634	0.0311068	0.00506218	0.767652	1.27111	0.326869	0.558844	0.210026	0.542634	29.4451	0.592796	5.45125	1
FBgn0040732	83.0242	319.687	477.563	2.62956	2.10901	24.1771	15.7865	1.17566	2.10133	21.6911	3.26713	5.75477	1
FBgn0262728	6.83413	7.0021	13.1832	4.55557	1.79478	10.7165	6.04233	4.69699	3.75956	5.81056	3.76287	5.07373	1
FBgn0035856	225.896	0.0735248	1.43567	0.721847	0.174732	42.8733	24.1481	0.161316	0.455681	29.4063	0.469688	0.322624	1
FBgn0260653	504.606	167.432	101.777	165.292	161.538	349.751	172.578	103.159	149.887	217.24	101.907	115.874	1
FBgn0261554	14.4178	10.9249	11.6124	8.83741	7.44616	9.61458	10.2363	11.3781	9.98111	13.4682	11.4142	8.67232	1
FBgn0035147	113.409	133.681	71.9363	16.2551	18.3201	33.5059	18.6277	14.3458	19.3328	28.7352	19.2575	15.2122	1
FBgn0030532	3.64559	1.53726	2.73763	1.49574	1.27793	5.81395	4.95388	2.089	3.06274	4.92464	3.03072	4.18291	1
FBgn0039505	15.3633	13.4165	25.5533	42.6855	42.4162	47.6499	52.5342	44.8575	42.7417	64.6652	45.2068	56.6152	1
FBgn0031623	9.04238	6.46394	32.6327	5.51926	2.23897	6.81691	6.0569	3.17737	2.44649	8.22471	4.35336	1.49259	1
FBgn0262680	0.0636846	0.241868	0.266327	0.677415	0	1.10637	0.724152	0.919857	0.336509	1.89456	0.365018	0.264998	1
FBgn0037702	10.8494	13.5735	24.154	23.1328	24.757	19.1169	21.5738	27.8761	29.4322	43.2523	30.7341	29.6922	1
FBgn0015034	1.68439	4.59603	0.637675	2.61233	1.17784	0.368358	0.706465	2.14472	1.41468	3.84736	1.65423	0.740596	1
FBgn0015037	3.83688	4.85125	2.44303	5.34854	4.82445	7.55952	8.07251	6.75222	6.76691	9.71876	5.59207	6.50922	1
FBgn0028433	33.3324	34.5463	57.6964	9.03125	5.04014	33.2807	11.9244	6.9196	9.50883	27.4066	11.8366	16.9513	1
FBgn0035623	2.1015	2.41097	3.7599	1.73147	1.39492	3.29839	2.21332	1.20233	2.10569	3.19488	2.24363	1.44476	1
FBgn0029745	0.0719161	1.21729	6.13002	1.22174	0.128686	0.0933645	0.591825	1.02778	1.42166	2.12165	1.03197	0.87036	1
FBgn0065055	11.154	5.63701e-21	2.10632	28.1241	13.327	16.3168	65.029	12.5859	24.6271	62.9786	2.39222	4.18736	1
FBgn0036152	11.8278	8.49834	11.4913	13.2252	8.74503	9.56014	6.81777	9.81589	12.0684	15.9848	9.47969	9.38204	1
FBgn0086051	183.903	112.272	141.545	639.882	341.329	1208.05	561.746	206.107	840.571	1608.57	556.075	277.215	1
FBgn0086059	0	13.2402	56.2597	28.5335	33.8777	39.4048	58.4155	23.1879	21.2328	75.7017	3.70466	43.2078	1
FBgn0086608	14.2201	13.969	47.9528	12.0155	6.38627	4.22656	7.86123	12.2266	10.7789	20.6871	11.1751	8.45919	1
FBgn0263042	0.127573	0.0935446	0.296394	0.953501	1.19182	0.556964	1.14356	0.47691	0.703412	1.54619	0.801548	1.19775	1
FBgn0020381	12.3655	7.89842	19.733	28.3197	23.4642	29.0183	21.2555	23.5785	35.2447	47.7849	30.6247	22.0272	1
FBgn0034455	16.7308	8.36502	14.8532	18.2465	15.6904	21.6232	21.6906	17.5392	17.0387	26.6814	17.0502	19.4601	1
FBgn0051777	89.042	110.275	72.5231	16.9916	37.0263	57.945	29.7984	13.7599	35.1078	107.572	23.3866	20.8113	1
FBgn0051778	6.77203	46.9744	152.159	0.784087	0.804678	2.22321	1.46594	0.307011	0.962608	3.79237	0.515227	1.75368	1
FBgn0025807	2.89138	9.94968	3.7061	14.5846	16.4342	11.5808	14.292	12.7994	12.0644	19.5333	14.703	9.11094	1
FBgn0025802	3.93689	4.28784	7.52034	7.09866	6.67259	6.06656	7.02196	7.73627	7.34825	9.46736	8.34077	6.86629	1
FBgn0035420	4.31576	4.6311	6.23834	7.70913	7.77831	7.00655	7.39651	8.57311	8.12277	8.9401	8.10919	6.80926	1
FBgn0023170	8982.26	8629.41	3940.91	8224.65	2066.39	8738.09	49639.7	40118.5	8538.73	52004.4	7611.2	60543.4	1
FBgn0001205	8.96974	5.0452	10.2358	8.42635	6.1287	15.7318	14.0168	9.9848	10.5594	13.2476	11.0181	9.9986	1
FBgn0033426	13.5905	8.67057	6.94338	7.22779	7.08253	9.76607	13.0132	7.64288	8.37942	13.1339	8.52568	6.45957	1
FBgn0028955	31.6394	30.8949	53.6511	9.97025	0.279934	17.4792	13.1637	7.0564	10.1015	15.2614	6.30671	8.40819	1
FBgn0000497	1.62346	3.38409	8.53114	36.0415	34.7648	29.0877	34.7489	38.7692	41.4641	46.9017	44.3821	36.4765	1
FBgn0037126	3.66003	12.7323	24.7983	17.3835	8.92953	13.2755	11.2669	10.5867	15.8015	16.8811	10.4077	14.5214	1
FBgn0038977	7.71701	6.881	1.32047	1.58336	1.08761	4.44999	4.00633	0.987453	0.948719	6.33558	0.85901	0.338861	1
FBgn0038321	14.986	7.55738	10.463	3.2805	3.07866	6.57747	4.20711	2.96517	2.51394	6.02251	3.40435	3.48355	1
FBgn0035401	27.4337	28.4067	27.9394	30.9019	27.9625	22.7541	31.3277	24.8954	25.8325	32.6763	27.4348	28.2684	1
FBgn0025624	10.9151	19.6233	22.4983	16.8593	15.0115	15.4179	16.7091	19.0248	15.7277	18.2673	16.5303	15.9625	1
FBgn0263650	0.475284	2.09104	1.4286	0.568756	1.9285	1.03211	0.935378	0.786611	1.06734	8.24791	1.41883	1.8541	1
FBgn0011708	46.0043	39.7092	51.0741	37.1747	42.4955	39.1545	43.7707	38.3616	40.0581	51.7837	39.4242	41.6546	1
FBgn0034626	8.81042	9.66754	17.0473	18.6545	21.8928	13.3958	21.2016	21.7624	22.3284	26.9141	21.1117	23.9076	1
FBgn0260429	2.55524	4.77873	6.7629	3.19847	2.88794	2.27337	2.07629	1.89913	1.23836	7.85153	0.786071	1.41633	1
FBgn0051637	12.1892	9.2468	19.5702	19.4419	22.2863	29.3084	22.4014	15.8036	28.6306	33.4681	19.559	21.7382	1
FBgn0051636	4.70273	4.62224	12.7714	1.08853	0.175122	1.78383	1.12398	0.821489	0.566984	2.8939	0.762233	1.02881	1
FBgn0083992	2.3159	0.101314	0.977122	0.855359	0.166426	0.0116144	0.00581036	0.614282	0.00592875	1.30722	0.715291	0.00139205	1
FBgn0051451	11.6167	6.79505	19.054	4.37008	2.77946	16.0769	7.38631	2.63664	3.60457	10.1428	2.9001	7.0302	1
FBgn0030838	15.523	37.0713	43.7473	39.3973	40.8126	35.5719	40.6278	45.86	39.7874	55.7907	41.9411	39.4975	1
FBgn0262364	0.274061	1.86891	6.9913	2.44876	1.93395	2.15839	3.35604	3.29876	1.96946	4.3483	2.35623	3.93436	1
FBgn0028938	11.6116	0.117065	1.33673	2.5273	1.62533	18.2644	5.85875	0.408374	1.60836	7.75318	0.571159	1.35368	1
FBgn0262717	81.3855	47.8254	18.9757	29.6912	22.9034	70.6229	49.3662	30.4817	41.8394	66.1446	40.009	45.2916	1
FBgn0262840	0.418578	0.367218	0.671695	0.514317	0.128526	0.921104	0.310965	0.245789	0.288506	9.41054	0.217073	0.0796744	1
FBgn0262846	2.01257	2.2367	10.9941	2.23432	1.60181	2.95653	3.22705	2.07932	3.28257	3.68194	2.26636	2.20188	1
FBgn0000479	30.4981	19.8737	25.7274	8.49405	7.93046	10.124	7.62513	7.50682	9.64861	11.263	7.36368	6.30349	1
FBgn0031461	12.9406	24.3944	42.3982	1.7468	2.48878	2.46284	2.93319	1.4928	1.84347	3.35666	1.27122	0.722795	1
FBgn0030332	2.69904	1.84756	0.832966	1.37624	0.282559	1.36496	0.709546	0.519293	0.466806	1.64104	0.219174	0.689286	1
FBgn0085339	122.825	197.216	69.4927	125.929	241.084	167.353	192.265	179.568	86.8681	427.264	92.2832	141.379	1
FBgn0263397	9.05166	9.41675	23.6508	2.82886	2.31654	7.64646	5.36024	2.20871	3.02224	5.92366	1.66163	4.45635	1
FBgn0033350	17.0285	13.6365	21.5802	18.3223	17.0592	18.708	16.1121	15.1459	17.8387	20.7697	15.9376	14.5933	1
FBgn0033356	20.9676	13.8614	31.4496	16.1726	15.3804	21.3682	21.9357	18.2695	15.6047	21.9279	16.65	14.9912	1
FBgn0034816	4.00425	6.36723	25.9891	4.59659	4.22265	4.12089	4.95033	11.8482	3.6829	10.4104	4.7407	2.00363	1
FBgn0036416	0.242249	0.532895	1.09123	1.12174	1.93739	0.945893	0.653332	1.19686	2.65027	30.6284	1.50419	3.03329	1
FBgn0032086	1.45599	1.14885	0.872345	1.6308	1.41154	0.829989	2.43912	2.55513	1.04814	6.00457	1.44512	1.62919	1
FBgn0035020	79.0143	106.186	101.65	45.4808	55.4493	41.4931	54.087	51.9086	60.6366	82.5394	50.2198	63.2321	1
FBgn0263631	179.991	4.89828	528.186	123.168	59.7283	136.724	95.8974	40.8627	191.303	752.735	88.1931	74.0595	1
FBgn0029980	15.7177	7.11423	7.23833	11.752	9.97243	12.5491	12.1659	9.52803	9.80863	12.2824	10.518	9.95059	1
FBgn0261700	0	0.674618	0.641253	1.63105	0.426005	0.355182	0.536488	0	0	3.0411	0	0.957077	1
FBgn0010051	6.31414	7.6387	8.14784	9.87577	10.8509	7.66147	8.39263	12.4912	12.9864	22.008	12.7929	12.3428	1
FBgn0027580	176.687	102.098	104.24	18.8147	11.8499	41.7728	33.2807	11.1039	10.4237	32.5019	7.43794	3.7313	1
FBgn0263548	62.4317	0	55.353	201.301	50.7553	16.1457	61.5707	67.8879	142.424	1071.63	35.9005	29.0554	1
FBgn0083044	8.10312	0.714443	19.3737	17.7299	31.3168	14.6354	31.7594	8.73787	8.14077	34.8325	38.1442	19.5754	1
FBgn0083049	45.1705	1.7806	13.2158	55.0335	25.4678	68.9681	16.8814	56.8178	39.0636	130.51	30.5063	24.1542	1
FBgn0086690	6.67337	7.11387	11.5033	16.2612	15.1579	14.2757	16.3908	18.8106	18.9247	22.9138	20.9696	17.5417	1
FBgn0035231	2.52948	4.72649	16.5911	0.513036	0.846724	1.88017	1.7313	0.679656	0.696184	3.4996	0.946304	0.513974	1
FBgn0052645	2.70766	1.07275	0.738212	1.48417	1.71415	11.9743	2.86676	1.37789	2.53022	5.51053	2.27376	2.47209	1
FBgn0034128	1.96439	3.61014	12.8211	0.740591	0.807153	2.65474	0.349412	0.688386	0.420448	5.91785	0.997649	1.07037	1
FBgn0262866	1.99192	1.68081	4.18213	6.69213	6.06154	4.61556	5.84444	7.34177	8.51348	11.3207	7.78955	7.68216	1
FBgn0033373	18.845	33.4877	27.0853	4.37018	3.9462	5.57793	5.79745	5.62455	5.93527	7.06974	4.59858	4.85703	1
FBgn0014411	24.0662	22.2667	32.9593	44.9367	46.0126	39.1071	46.5781	46.9978	43.512	50.0858	49.0401	48.3709	1
FBgn0086757	9.62156	12.335	19.3664	12.2945	9.85895	9.70325	12.0601	13.4585	12.0778	16.589	13.327	12.8309	1
FBgn0011693	0.753522	0.694934	1.0949	0.985351	2.33856	1.18864	1.1604	1.3333	2.9471	21.0432	1.67211	3.1571	1
FBgn0039776	24.1039	14.4384	13.3195	12.6696	19.0074	17.5078	15.1673	15.8266	14.3833	28.6689	15.109	19.8492	1
FBgn0037643	153.818	118.969	114.729	106.745	89.7069	142.835	129.93	100.535	74.1248	135.876	74.6845	72.8152	1
FBgn0037312	135.966	60.6932	75.1465	87.1323	92.5076	70.4272	86.4068	87.2437	109.541	154.555	98.99	105.913	1
FBgn0005386	1.75239	3.52602	7.49428	8.97181	7.51772	6.77476	7.79825	9.84802	9.0586	11.6165	10.2716	8.39579	1
FBgn0028684	74.0018	91.7682	213.808	170.808	188.902	137.371	175.897	169.677	166.969	195.782	182.927	159.266	1
FBgn0037515	11.2593	14.8033	30.6151	3.78667	3.40364	9.15502	7.28615	2.25633	2.95634	6.63644	1.63223	4.18914	1
FBgn0260401	4.94541	3.43723	5.70695	7.41076	5.52469	14.973	3.62106	3.04278	8.61823	17.7627	4.01329	2.19336	1
FBgn0016926	42.0247	118.337	127.153	28.6657	32.7036	86.0273	39.2487	26.9301	33.4021	37.1255	29.6881	28.1868	1
FBgn0052226	2.79313	3.32059	6.497	7.15513	6.00803	5.86102	7.58226	8.52836	8.43023	10.1885	8.49817	7.45299	1
FBgn0030990	32.042	22.0202	26.1615	25.7165	26.7269	23.7682	24.8846	27.2619	27.6228	31.4156	27.2376	24.5276	1
FBgn0004509	16.1686	13.3978	22.0876	18.2732	16.4814	30.0792	17.7291	15.8813	20.9045	31.683	15.3555	18.2532	1
FBgn0053092	0.174316	3.88768	6.52874	2.47867	0.0188145	3.23847e-58	0.0315193	2.4119	0.105682	2.91125	1.62083	0.00934879	1
FBgn0262994	0.117746	0	0.256405	1.25356	0.332469	0.401726	1.02178	0.613674	0.401669	1.15374	0.237555	0.540452	1
FBgn0031818	28.2725	24.04	27.8602	20.5997	22.6752	20.299	19.5166	22.1219	21.6635	25.7119	22.444	18.5221	1
FBgn0039698	24.6245	17.2258	22.5525	38.3965	40.628	31.8012	42.6899	39.1757	42.6984	58.7618	35.741	44.0093	1
FBgn0019886	35.2917	24.8315	29.8251	18.7605	17.5391	19.8924	22.2177	18.908	19.7458	27.992	18.8967	12.8643	1
FBgn0260467	27.0646	20.5382	22.9943	23.5718	28.2875	22.8986	26.7487	28.2749	24.5986	32.1751	25.5052	25.8153	1
FBgn0039109	26.2633	45.3163	109.401	3.5231	3.69432	10.3173	4.50203	2.30072	2.7911	4.83835	2.85319	2.04625	1
FBgn0031374	16.3519	12.067	25.1698	21.8408	17.577	27.1606	22.8669	24.1554	21.6177	35.1996	25.6483	25.6307	1
FBgn0031590	44.1261	25.1251	40.7096	40.0977	38.143	41.7569	45.8028	37.6872	43.484	45.0453	38.8669	31.0809	1
FBgn0004882	0.585859	2.79258	15.7348	0.90247	0.403121	0.277707	1.34156	1.39051	0.707714	1.61036	1.14206	0.873048	1
FBgn0033191	32.8674	19.0969	27.5145	33.5046	33.9538	39.3462	43.6448	42.9788	34.4366	43.8085	38.2305	34.744	1
FBgn0039296	10.9127	7.96727	7.43595	6.8322	9.80627	7.94589	8.12571	7.77067	8.6995	12.3834	8.6083	8.4626	1
FBgn0037998	8.64458	9.05398	14.0587	12.8942	13.3179	9.84776	12.1114	12.8837	14.438	17.1121	13.666	12.2605	1
FBgn0028527	16.6495	18.177	28.9356	41.3127	24.6777	42.2104	47.4293	38.9626	37.2576	63.4626	44.5241	35.8229	1
FBgn0035049	17.4243	14.8992	46.5348	12.0954	24.3927	21.452	21.4889	11.9499	16.4385	45.8166	7.51922	13.208	1
FBgn0031299	2.94895	3.65653	5.04702	1.0366	0.500697	2.4302	1.40239	0.930865	0.514462	1.73339	0.618877	0.893341	1
FBgn0039736	3.82353	1.23864	0.848688	0.721833	1.33973	0.62433	1.04489	1.13592	1.10094	2.14681	0.992556	0.390868	1
FBgn0014135	3.96171	2.07905	3.46989	1.91016	4.1035	4.85663	5.66946	2.65006	4.31247	5.81054	4.53313	4.89269	1
FBgn0036005	12.243	12.4141	25.1476	35.2836	32.3242	33.6426	46.4193	40.4226	32.0768	45.1669	36.5871	45.0049	1
FBgn0001114	256.126	108.675	191.511	12.8702	20.4871	47.0938	27.2218	8.4148	32.023	24.2672	15.9951	15.4397	1
FBgn0033753	5.98202	3.36264	2.41823	2.79451	5.32308	9.05445	4.52252	3.04215	4.11558	10.3018	2.36638	4.46599	1
FBgn0034434	0.824572	1.42488	15.2739	0.582735	1.60574	5.80621	5.52755	0.384123	0.173693	9.61782	0.332753	0.319741	1
FBgn0044047	0.916525	16.771	56.207	3.20438	4.22705	3.42918	3.47301	3.2068	3.25341	6.555	2.96158	3.54844	1
FBgn0263440	4.38211	2.74984	5.80633	4.69958	8.45204	7.22777	5.63859	5.75925	7.82849	10.6648	6.47636	3.39734	1
FBgn0001150	0.257722	0.221843	0.199156	0.679389	0.885604	0.571017	0.617469	0.809243	0.69975	1.33339	1.05971	0.785834	1
FBgn0001404	22.5584	19.1951	49.7227	21.1655	19.9415	19.3546	20.5723	19.8406	20.3707	24.2891	20.5266	20.3663	1
FBgn0034897	18.4669	18.3474	37.6324	3.07581	4.28534	5.569	4.0733	2.68448	3.18406	5.19677	1.98243	4.14967	1
FBgn0034543	38.3608	49.6235	112.599	37.6259	40.7883	42.1001	47.9019	53.5856	42.041	51.5429	46.9639	46.4655	1
FBgn0051374	22.0412	21.0796	49.3579	8.45933	3.69904	11.0044	5.66439	3.55817	2.95875	12.6676	1.87617	1.23996	1
FBgn0036765	11.6445	5.95085	13.9788	1.16004	1.2679	1.66513	1.17136	1.72896	1.29817	2.64149	1.4697	1.13495	1
FBgn0032006	12.5932	10.9629	23.2439	12.391	13.8521	11.4655	10.2598	11.7848	15.5586	31.0612	13.168	13.8034	1
FBgn0053056	8.26489	23.4974	8.62071	9.15062	9.85015	9.49171	9.74744	8.91414	8.32532	10.6646	7.29783	9.00029	1
FBgn0033710	0.948026	1.69627	3.49492	0.722664	0.291652	1.93248	1.71406	0.681701	1.67283	2.93495	0.503966	2.28259	1
FBgn0003093	7.82306	9.69435	19.6105	18.4996	19.025	15.0925	16.2829	23.9082	27.5645	51.0785	19.6609	24.1745	1
FBgn0261787	8.69356	6.35559	11.0007	9.30975	8.72533	9.64273	9.81115	10.2226	10.7008	11.4134	9.79827	9.00531	1
FBgn0030099	11.4508	8.78497	11.8993	25.5613	26.6163	18.992	24.6056	26.1696	30.1583	32.9268	28.4342	24.4165	1
FBgn0259152	4.04153	3.51047	4.17417	6.90534	9.26601	6.299	8.34741	8.07307	6.32425	9.68977	6.85838	7.16834	1
FBgn0011769	17.8186	10.6801	16.4225	17.8768	18.8175	24.693	22.1026	21.0089	18.78	102.644	19.1334	50.658	1
FBgn0051161	0.615733	3.43169	17.7638	0.784674	0.170674	0.574244	0.708705	0.844251	0.34506	0.839441	0.566062	0.503207	1
FBgn0036020	16.8234	16.3712	26.5143	21.5551	19.1063	19.0896	24.3718	23.787	20.6452	30.4717	23.8156	20.1378	1
FBgn0263490	4.66356	4.96561	7.80976	19.5678	16.7217	14.5141	15.4972	20.1808	20.8445	39.8134	19.5588	18.1563	1
FBgn0032637	0.658214	10.1612	22.778	1.06838	1.04934	0.350711	0.174774	0.95298	0.166814	10.178	0.494161	1.12943	1
FBgn0035947	71.311	42.6956	45.4861	70.107	86.3257	64.2551	79.3803	71.3475	75.7611	116.594	66.9653	79.5217	1
FBgn0086472	3603.29	2770.32	2392.38	4016.6	3207.5	4737.56	4627.38	4211.35	4268.08	4733.54	3825.38	3575.6	1
FBgn0062413	37.399	17.1867	25.5227	25.0074	21.6465	31.3136	25.7379	27.3587	22.1986	27.9705	22.9854	22.7747	1
FBgn0042712	16.4244	13.457	23.397	25.8594	25.2223	22.0331	27.4043	28.726	28.2707	31.9277	29.8229	23.9583	1
FBgn0000241	1.42296	3.77469	25.3179	0.698414	0.21905	0.172528	0.264014	0.00874691	0.130632	3.17687	0.158764	0.28951	1
FBgn0038675	29.5313	24.4889	36.1653	36.9092	39.2171	37.4521	44.6706	37.7142	38.8223	46.0818	42.2109	45.1993	1
FBgn0030467	3.77539	3.19633	6.57725	12.7384	8.89238	13.4248	13.1101	10.9206	10.8795	13.4947	11.6554	9.16549	1
FBgn0082962	26.9524	26.9177	7.8513	26.2252	20.0672	58.0382	51.4655	59.081	28.5016	62.7374	22.9	41.7433	1
FBgn0065087	1692.42	817.302	3163.26	1034.65	1191.15	2858.09	1589.86	844.03	1343.39	1646.83	1485.63	754.017	1
FBgn0032025	30.9429	40.1546	56.946	2.38671	0.221901	1.92745	0.795517	0.783987	0.707139	10.3888	0.649659	0.413425	1
FBgn0053963	0.789698	2.71585	0.788341	1.19105	0.207874	5.49048	2.40963	0.438293	2.79089	12.5852	0.848287	0.690978	1
FBgn0020660	95.0513	69.9084	105.214	232.439	242.025	235.451	270.11	213.529	215.821	294.897	204.02	255.102	1
FBgn0037350	10.8049	10.7528	24.352	12.7118	11.2065	12.8855	21.6485	15.8039	11.4351	29.913	12.0588	14.0586	1
FBgn0033665	15.7217	7.20898	6.43415	6.07152	5.36873	7.03181	5.5637	5.56331	5.39611	6.32648	5.34183	5.72783	1
FBgn0039081	40.3069	34.9313	26.1907	0.956923	0.238509	2.33128	1.7861	0.0295134	0.511015	2.37179	0.166376	1.45012	1
FBgn0031258	2.15299	3.20948	3.58759	1.51736	0.279769	1.61422	1.09725	1.81366	0.612731	2.72419	0.940011	1.19269	1
FBgn0259170	11.5508	9.01053	9.88472	21.4226	18.5754	21.8934	23.2472	23.2459	23.5825	26.7873	27.3633	21.787	1
FBgn0039685	1642.8	25878.4	16864.3	158.827	43.0293	98.0214	39.9772	87.3883	39.2323	618.661	226.686	151.996	1
FBgn0034068	17.3098	21.6785	35.4625	33.7036	41.5583	34.2549	38.091	38.4298	38.49	42.9021	43.3853	35.2067	1
FBgn0010412	2829.82	2253.72	2091.54	3740.62	3869.62	2984.38	5499.52	6207.1	3897.14	5935.19	4169.45	5793.54	1
FBgn0030617	1.86489	0.989094	2.12595	2.37892	2.4965	5.01173	3.28933	3.28465	2.84814	10.9716	4.6634	2.79673	1
FBgn0051140	8.54596	5.56184	12.3408	2.69377	2.12516	7.61359	3.44097	3.2137	4.78629	8.11476	1.78261	5.315	1
FBgn0033252	2.08607	0.134964	0.226185	0.551224	0.115003	4.07372	1.2008	0.458852	0.309006	1.78354	0.629334	0.201058	1
FBgn0034937	1.90902	1.61999	4.33359	0.876081	0.786886	0.979974	0.289551	0.858955	0.584257	3.13359	1.02815	0.1314	1
FBgn0083045	1.18856	0.38954	3.03097	3.19968	8.85902	13.1083	9.9346	6.86235e-117	1.90336	56.1579	5.7168	1.16173	1
FBgn0083042	9.77981	0	2.34278	21.9918	0	35.2612	5.90759	0	13.5274	19.4898	3.58543	5.27657	1
FBgn0086676	19.5896	24.9164	28.1141	30.0986	31.9565	28.9312	31.3505	31.4221	32.1405	36.4052	29.8	27.9168	1
FBgn0086675	2.76594	4.34171	12.2297	0.816452	0.686378	6.66792	2.62584	1.54225	0.647144	2.9362	1.81999	2.34294	1
FBgn0024814	108.129	85.547	151.128	178.912	175.872	175.601	167.759	152.045	198.581	219.814	176.491	154.014	1
FBgn0036752	40.8547	18.0741	7.85386	2.31313	2.19263	3.24651	1.77685	2.12624	2.89624	6.53904	3.11982	3.54952	1
FBgn0263485	6.97467	0.058991	8.40208	35.7866	3.69115	11.2014	1.7887	5.81303	35.1043	160.712	22.4464	6.79242	1
FBgn0082947	0.587434	36.958	32.5739	84.2763	0.0624915	76.0273	561.1	525.783	27.9272	833.013	0.53416	856.392	1
FBgn0082942	49.8941	14.8447	46.5302	71.5377	0.00024098	33.6337	41.271	0	35.8267	1873.8	77.9811	58.1333	1
FBgn0037236	8.65687	5.9354	13.0779	31.536	23.5592	28.3927	33.1366	32.8452	21.9169	37.551	32.765	16.4362	1
FBgn0003612	14.5947	15.5156	26.9374	49.6328	51.1229	39.5216	50.7188	55.3295	56.0618	69.1754	60.3326	48.1386	1
FBgn0263108	18.0551	12.6391	26.741	26.9431	17.5601	26.1137	26.7888	26.8519	33.9255	36.6869	30.6413	24.8747	1
FBgn0017397	42.197	32.2761	98.2147	55.7895	51.4164	61.5303	56.5769	44.6923	63.1066	79.0307	37.3124	58.7928	1
FBgn0037900	11.7239	11.1359	18.5741	7.56157	7.73665	7.48663	7.17385	6.66672	8.74483	12.3347	8.73952	6.25366	1
FBgn0260748	10.8226	14.0262	18.4355	17.1505	13.6574	17.2286	15.5485	16.5774	16.7812	19.1436	16.926	15.7033	1
FBgn0039066	9.06391	10.6767	15.432	15.3493	14.5898	14.1029	15.6564	16.6139	15.3939	17.6419	17.4292	14.6599	1
FBgn0039069	11.2624	1.48754	1.18771	1.58706	1.63759	3.75418	1.68371	1.7673	1.37726	1.87397	1.56748	1.49851	1
FBgn0050033	10.6419	5.98345	7.90499	9.52205	7.49669	13.5213	7.78368	6.08672	17.3867	28.4853	11.4871	6.92409	1
FBgn0031183	30.122	16.5412	17.3457	12.4308	10.679	14.1616	14.7404	13.7108	16.0415	19.2185	14.4953	13.3614	1
FBgn0029858	11.5775	2.43008	9.90893	9.56116	12.5721	14.3929	16.1925	7.79504	13.3477	22.8049	13.8108	10.8993	1
FBgn0038692	5.74336	6.92704	10.3631	23.9183	28.6816	14.5287	29.2606	28.5797	27.913	29.9529	32.0601	26.1692	1
FBgn0033234	8.52611	5.644	1.61927	1.27061	0.439527	0.50435	0.309157	0.333573	2.24193	4.04949	2.24967	1.13202	1
FBgn0027453	7.60477	6.42318	12.9734	16.3502	15.0405	14.8481	17.2573	18.0884	17.554	20.9323	18.1273	17.7557	1
FBgn0023023	14.5243	10.4764	7.86654	3.85952	2.80255	11.6884	7.33208	4.26891	7.63741	13.4234	2.89646	12.2566	1
FBgn0033605	24.1149	20.4607	21.7447	32.1716	28.323	32.6643	37.1494	37.3287	31.3117	39.9006	27.2535	28.2539	1
FBgn0036512	13.4657	13.2013	23.5235	19.5379	24.1908	18.2284	21.0988	21.2037	18.1764	26.5056	21.0803	19.6021	1
FBgn0037635	34.8807	29.9983	91.8044	0.995762	1.39233	5.13314	4.32684	0.932824	1.70126	4.23756	1.046	1.64838	1
FBgn0028487	4.5258	7.83947	15.3188	4.8604	1.38786	3.81578	3.588	3.81037	4.48319	7.26031	4.54891	3.44437	1
FBgn0034850	5.41448	31.1794	21.975	2.20652	0.295471	0.0962503	0.732405	0.634845	0.66696	4.04564	0.0673341	0.190916	1
FBgn0003204	22.115	22.4478	66.7984	48.7514	49.058	59.706	54.4654	49.2194	57.7125	78.7411	49.6677	34.8499	1
FBgn0039620	16.8472	12.89	29.2182	4.63212	3.5249	7.27507	3.99926	3.07283	2.85544	6.06324	0.609367	3.72189	1
FBgn0082923	8.18344	4.6682	7.9741	2.68393	13.5631	23.565	3.17616	5.78262	17.4955	45.7152	1.56996	0.0138236	1
FBgn0030935	0.486213	0.770033	2.10538	0.531143	0.491122	2.0975	3.49643	1.21793	0.912972	5.02494	1.09771	1.37623	1
FBgn0000056	17.6436	6.15989e-06	5.8351e-10	0.991019	5.21755e-33	1.2104	0.533765	0.147203	5.72489e-26	5.05066	0.168434	8.55873e-49	1
FBgn0034400	6.47724	7.79031	14.3859	6.93764	8.34101	7.30436	7.14011	7.98734	9.25609	11.6088	8.45628	7.27574	1
FBgn0262387	0	13.066	11.9448	7.40749	0	19.8008	0	0	0	41.8308	0	6.43974	1
FBgn0086355	799.561	551.174	159.42	250.196	132.965	219.649	153.263	164.407	191.989	230.239	140.095	136.176	1
FBgn0086348	2.02884	1.86961	1.45506	1.40189	2.75567	1.2439	2.05998	1.8541	0.866859	4.20092	1.27133	3.0166	1
FBgn0030038	39.0716	44.1787	64.6407	65.339	68.0503	91.4396	86.9402	69.5656	71.3422	116.574	90.5707	81.9605	1
FBgn0037684	28.7426	42.3687	27.3953	0.920913	0.536909	0.621829	0.618258	0.551745	0.5305	1.17822	0.42978	0.590325	1
FBgn0037683	19.7702	58.7508	82.9198	0.968522	0.695645	3.58269	3.24708	1.92647	1.44922	2.77635	1.23814	1.31186	1
FBgn0050495	7.58758	3.72136	3.71177	1.45377	0.665129	0.85512	1.13201	0.68087	1.38006	1.55779	0.0167018	1.40541	1
FBgn0050496	1.28573	1.61547	2.27006	5.72544	5.92112	4.84512	5.62511	4.70864	4.06725	7.77859	6.82235	5.5659	1
FBgn0033479	1.78911	2.96415	4.11435	2.33494	2.40882	1.76656	2.41801	2.30276	2.11485	2.86839	2.24152	1.94046	1
FBgn0034031	56.9758	89.8407	80.7515	0.568121	0.382409	1.16302	0.381851	0.285215	0.778259	0.764138	0.398523	0.471086	1
FBgn0024361	61.0261	70.8138	37.767	1.93163	2.43742	1.42579	0.71934	4.49924	1.98691	8.4314	3.05077	0.871468	1
FBgn0002283	15.1929	13.5213	22.7569	27.646	29.015	25.0647	28.1031	28.6633	31.715	40.524	31.8884	33.0942	1
FBgn0034350	15.385	20.6145	23.3053	23.19	20.1206	24.3641	23.9317	22.4791	20.4139	24.0927	20.2118	26.1745	1
FBgn0085483	33.466	51.6686	26.3655	0.892297	1.30853	1.58515	1.11991	0.850276	0.886504	1.31344	0.970045	1.01043	1
FBgn0015569	20.8451	11.2743	4.37723	1.50957	2.74487	4.07239	3.36675	2.27332	2.23439	5.87345	2.24536	2.23076	1
FBgn0259220	31.0111	23.5845	44.2602	54.255	49.1932	69.145	59.1064	51.7639	58.4926	62.7954	55.6563	41.3582	1
FBgn0259226	3.70201	1.31738	0.272352	0.768192	1.11626	10.0426	11.0969	0.739123	2.13415	6.80922	2.85873	1.92492	1
FBgn0259225	10.2374	27.6799	8.27647	0.756859	1.24692	2.24519	0.903788	0.744877	1.83518	5.05105	1.27737	2.06946	1
FBgn0035432	21.1069	19.4713	41.4675	22.8097	26.01	24.9647	25.0409	23.6039	28.6584	38.5542	23.7392	23.8183	1
FBgn0039790	28.6658	23.4217	34.612	56.5249	50.539	45.6782	54.0488	57.5625	57.4356	60.6798	55.2596	53.2431	1
FBgn0010282	28.0013	23.7493	28.4313	48.3763	48.8077	39.7558	50.8659	50.0532	49.7949	54.362	47.6678	44.478	1
FBgn0027496	58.5175	44.2291	56.8386	88.1549	84.6191	82.4599	76.9147	61.1055	94.4861	105.921	83.2231	72.7204	1
FBgn0037652	53.7756	48.2658	50.877	117.387	77.8199	97.1745	149.972	118.747	57.1872	168.159	102.565	96.5471	1
FBgn0263342	0.189128	1.48655	3.374	9.15241	11.4659	7.43824	11.785	7.12344	7.91053	23.3788	5.0072	9.24547	1
FBgn0263345	0.292047	0.777446	3.25567	0.529832	1.15686	0.492882	2.61498	5.30834	4.01765	15.3951	1.40798	6.32099	1
FBgn0035495	31.6229	23.7831	51.3537	0.973647	0.00367427	21.8084	2.44843	0.226239	0.000858627	6.17034	3.26265	0.233055	1
FBgn0029795	16.5668	27.4294	49.555	0.554969	1.18285	0.279105	0.167481	0.210721	0.375508	2.33814	0.786422	0.187436	1
FBgn0052284	81.9316	71.5531	6.31509	1.10777	1.66577	1.60821	2.20317	1.08639	1.10058	2.75392	0.663235	0.938923	1
FBgn0027793	11.7939	16.2225	5.53327	0.657269	0.227496	0.995675	0.892956	0.452717	0.170348	2.13126	0.898238	0.33537	1
FBgn0045842	7.28844	10.419	23.0896	8.98988	7.3789	8.66267	8.42095	8.03306	10.1437	21.8348	7.89439	11.2779	1
FBgn0052700	4.04857	4.57079	4.9718	2.17468	3.18344	3.84208	4.39066	2.33076	1.51232	5.03639	1.83046	6.42827	1
FBgn0038981	23.8401	34.377	29.1825	39.8371	50.751	42.4048	50.9909	71.5315	42.1437	74.8929	69.3915	54.3916	1
FBgn0039341	50.4326	28.5899	32.4392	47.5956	51.4834	35.4137	45.0288	51.5535	60.3907	80.0755	52.4375	50.9056	1
FBgn0259247	44.9854	27.4597	18.6903	14.4977	17.7803	48.8918	21.9721	10.6113	20.1664	33.4248	8.88714	20.4787	1
FBgn0261634	0.142913	1.25751	2.9883	0.506487	0	0.165518	1.75006	0.172019	0.604123	150.221	0.409565	0.148669	1
FBgn0020385	61.1314	58.0124	66.1535	10.012	22.5289	13.1823	12.7898	17.9073	10.5172	26.9768	10.004	9.15108	1
FBgn0030693	15.9955	21.3485	17.9759	15.8702	19.4408	16.3644	16.0279	13.7514	17.6359	55.9025	18.8886	16.2285	1
FBgn0030362	1229.08	1520.37	1152.05	113.187	104.356	397.455	230.752	63.3067	212.29	196.107	159.465	99.1277	1
FBgn0037753	1.89397	1.05253	2.94997	2.11476	2.05147	4.95685	3.95248	2.53781	3.85076	5.58271	2.87438	3.17431	1
FBgn0020655	35.4174	24.7752	23.2586	22.5161	32.9642	27.1059	30.0937	26.4114	27.9397	39.0863	25.217	28.813	1
FBgn0024326	27.1394	20.586	31.1608	46.1236	44.2023	41.6501	46.88	43.9048	48.4878	48.7364	45.4467	42.8011	1
FBgn0030734	75.8434	70.2263	72.9641	78.9158	86.1355	67.913	80.3115	76.8666	81.6683	114.977	76.2558	79.4008	1
FBgn0010772	12.8873	10.4063	25.4275	30.5629	28.1134	24.9294	31.1473	30.1068	41.6219	53.2688	34.0661	36.6593	1
FBgn0085222	0	0.0332301	0.410626	6.17027	6.73702	2.76428	4.22819	8.18218	5.20429	15.8786	9.58184	6.16008	1
FBgn0005593	2449.06	1909.1	1725.62	3268.09	3131.49	2933.08	4155.48	4267.47	3280.76	4049.43	3581.41	4067.54	1
FBgn0005592	4.17312	3.07998	2.87287	2.75069	2.02571	2.99397	2.50394	2.11571	2.29413	4.09765	0.738218	2.24976	1
FBgn0039236	1.33617	4.11501	11.2455	0.639582	1.50863	21.5105	6.19428	0.723736	0.564827	10.6	0.382925	1.38999	1
FBgn0058354	1.89162	2.73075	4.40341	8.17424	9.17707	7.66787	10.4445	12.9141	8.90205	12.1634	9.30331	9.80826	1
FBgn0262368	5.30642	0	5.75654	93.9698	2.47408e-61	0.658854	35.1257	1.36731e-11	0.012314	63.152	0	0	1
FBgn0038412	19.3222	13.1886	13.1291	1.30396	2.57338	5.81372	2.75397	0.828043	1.83578	2.52749	0.715682	1.6136	1
FBgn0263541	8.12962	25.7686	8.72351	9.20949	13.8993	7.3591	8.77492	21.6131	26.7543	81.2072	3.58559	15.1546	1
FBgn0030502	25.5405	26.6823	41.2532	35.794	37.2616	30.4097	35.9253	39.7496	36.6443	45.2585	38.4864	41.7372	1
FBgn0051219	1.64282	3.72036	1.6757	1.91381	0	0.502444	1.58385	3.22788	0.0399358	5.67324	1.65784	2.60947	1
FBgn0037779	50.9657	48.9703	41.0747	27.128	30.7087	27.5733	32.2499	29.5511	27.3658	39.5689	24.277	27.1585	1
FBgn0003884	766.463	455.283	598.909	967.245	1117.14	1262.9	1076.84	1008.06	1184.84	1364.75	1236.14	1055.27	1
FBgn0053080	25.1546	16.6651	27.2894	2.4201	1.17498	3.16707	3.30975	2.12236	1.46488	11.7101	2.00725	1.60458	1
FBgn0025697	3.29342	3.28586	8.84546	1.93885	1.90415	3.21898	3.16517	1.84009	1.95877	7.44016	2.48389	3.90678	1
FBgn0260026	25.5196	17.8354	7.86766	1.3988	1.64278	2.28546	1.68552	1.88189	1.89534	4.2995	2.25254	1.70095	1
FBgn0039634	8.39	8.09481	11.9248	22.0041	23.6674	19.8983	22.4408	25.4629	21.5783	27.0322	25.0183	25.1201	1
FBgn0262979	1.82649	0.489671	0.371766	0.779249	1.17259	0.98229	1.28804	0.992244	0.310283	1.66901	1.24703	0.476584	1
FBgn0050081	0.450797	0.253799	0.205808	0.722766	1.62651	0.81759	1.69835	1.37927	1.99991	3.58358	1.45467	1.2562	1
FBgn0001256	2.19894	0.63515	1.28354	1.96966	11.3531	23.2094	6.01066	1.0647	18.4811	415.448	0.0175167	16.0648	1
FBgn0038539	1.9769	11.997	31.9594	1.33401	2.8138	2.07705	2.22114	1.60506	3.51381	4.37472	1.99591	1.72655	1
FBgn0261882	11.2417	10.2344	11.4897	18.8777	11.4097	13.3998	23.9775	21.2399	23.3809	36.7874	24.4209	12.5263	1
FBgn0260238	0.53881	1.65791	3.97714	0.628802	1.33862	0.825714	1.21135	1.45746	0.631822	9.51284	1.92785	0.625804	1
FBgn0020372	6.60278	4.16548	5.26238	3.00757	11.6037	12.0903	4.94951	2.37505	1.93066	14.5798	3.54922	3.42123	1
FBgn0030006	4.52955	6.68176	11.4204	9.34052	12.779	11.0021	11.6606	13.1762	12.8792	15.2736	10.8875	10.9882	1
FBgn0031659	9.39561	9.86452	9.34567	5.96261	5.32551	5.87618	9.55324	7.9114	3.76844	11.2123	4.1079	3.95285	1
FBgn0260933	0.680458	0.818134	2.25517	2.14377	0.866134	2.23324	2.0729	3.6596	2.50856	5.35427	2.72696	2.35647	1
FBgn0037718	75.9757	31.028	35.7165	40.3311	41.7142	45.4573	38.2388	29.2204	46.3729	49.9406	37.6699	32.9957	1
FBgn0040398	280.462	186.352	357.567	10.1674	18.797	46.5202	26.5867	7.57614	22.6457	26.5592	16.0678	10.6378	1
FBgn0033380	8.6187	6.77633	10.51	17.5109	19.8331	12.7429	17.5561	22.5068	19.0505	24.8562	21.1399	19.3407	1
FBgn0035437	7.68436	10.834	29.1856	20.9696	20.9713	16.0109	20.1398	23.2974	22.1292	27.2705	22.3006	21.8024	1
FBgn0036449	17.3946	22.6036	45.1533	2.71651	2.30722	7.43812	7.01309	3.89935	4.13763	11.4921	4.01511	5.99077	1
FBgn0035388	18.7788	17.1524	29.2764	21.9247	23.6967	23.686	22.738	25.7376	27.1489	35.6356	27.3565	23.5485	1
FBgn0263665	0.414288	0.862899	1.95094	0.723734	1.72084	0.417304	0.500617	0.487699	0.486144	8.6962	0.994128	1.35821	1
FBgn0027080	63.4029	36.1941	41.2683	51.6079	57.9614	59.4984	61.2004	54.4197	51.9906	61.8512	52.9544	51.2055	1
FBgn0027088	54.1289	27.2021	34.342	84.285	88.6812	77.7726	91.1719	86.347	84.965	93.8522	88.5195	77.6421	1
FBgn0036146	1.96225	2.28737	2.58007	1.78129	0.347476	2.99543	1.13102	2.10721	0.604285	1.98094	0.804674	1.42171	1
FBgn0036145	5.91565	5.42559	11.5239	3.38595	2.03859	12.408	3.51359	4.82411	3.70126	6.4284	3.36391	4.2435	1
FBgn0053143	0.4371	0.527588	1.31526	0.866319	0.618826	1.09567	0.487277	0.435024	0.67115	1.14988	0.335244	0.716884	1
FBgn0031652	11.9826	6.66736	14.9778	16.5988	16.1141	8.14289	17.0293	16.2584	6.78555	33.8486	19.8052	20.3431	1
FBgn0043853	3.9412	5.46151	10.5861	38.4653	49.6781	23.311	55.8084	50.8288	41.1695	120.561	36.9211	61.7881	1
FBgn0033995	9.32279	9.89934	12.1524	16.8634	17.2577	14.8478	18.3955	15.7627	15.4402	20.9004	16.1834	14.4827	1
FBgn0037612	7.92494	8.69629	41.1835	0.893955	1.58015	1.72012	0.981542	0.338693	1.41752	13.8779	1.13094	0.793568	1
FBgn0030105	88.9973	716.082	377.609	2.86127	2.12925	27.7931	16.3257	0.664562	1.43847	13.4985	4.53155	4.65701	1
FBgn0022268	224.439	147.75	208.147	241.843	251.992	216.649	261.941	213.639	285.457	424.491	218.449	290.243	1
FBgn0046247	17.374	19.4252	36.1273	28.1803	33.8506	29.9037	30.7871	36.6992	32.6979	43.7976	34.391	34.1504	1
FBgn0038339	0.305319	0.148807	0.232149	0.827327	0.270174	5.33713	1.83909	2.28611	2.94022	13.8508	3.59484	4.0314	1
FBgn0040513	0.288638	2.17151	2.24072	0.883238	0.0330369	1.4147	2.43985	1.44167	1.20989	11.5555	1.56515	2.45923	1
FBgn0052365	0.595162	0.789235	1.9913	3.55682	1.54735	2.48619	2.07613	2.26252	2.29388	3.46809	1.36612	1.53981	1
FBgn0051347	3.12156	7.7111	17.9087	8.28673	6.14054	7.04113	4.77032	6.34856	7.15197	32.7136	8.39831	6.7916	1
FBgn0262518	34.5758	33.7875	61.0611	83.0372	84.2451	76.3063	83.1576	74.7733	73.1395	91.3104	73.8724	74.1021	1
FBgn0086708	43.2526	27.9535	62.2577	19.0228	12.0291	38.2025	21.7827	19.9385	24.0048	30.394	18.026	13.8866	1
FBgn0259749	113.051	64.6541	39.9306	16.9482	17.9952	34.8217	18.3351	15.3693	16.2701	23.4229	14.7848	14.2189	1
FBgn0020236	265.691	96.5593	97.1407	71.7911	61.2709	75.6212	82.5993	79.992	68.3302	85.8766	72.6918	63.8846	1
FBgn0038108	9.18875	9.1104	18.6011	32.5461	29.3786	23.9057	27.8378	35.0482	38.0902	50.739	38.4456	32.393	1
FBgn0040212	3.83422	4.66213	4.99026	3.85675	3.43259	3.21809	3.59357	4.04909	4.13344	4.56807	3.72572	3.74322	1
FBgn0050338	4.33515	3.24538	6.3685	6.37805	6.24258	6.44354	8.14276	7.8316	6.2391	42.3997	5.68857	6.25841	1
FBgn0032752	1.77709	0.697359	1.36401	2.21368	1.75757	1.60958	1.44924	1.55496	1.70805	10.4052	1.27603	1.20589	1
FBgn0086069	63.564	1.15389e-132	39.5993	94.942	125.714	74.5086	196.067	253.033	66.8695	354.57	282.579	161.021	1
FBgn0086066	40.9046	0.371506	67.8469	48.3937	99.8684	25.4195	78.7748	137.162	34.8959	236.107	152.837	142.05	1
FBgn0001215	95.3707	91.3179	213.149	348.799	372.997	316.314	368.197	363.581	403.428	481.672	442.45	371.543	1
FBgn0033049	1.62875	1.80183	3.32928	5.13325	6.3298	5.34683	5.0322	5.52083	8.65175	11.0501	6.52041	5.50815	1
FBgn0035999	10.5499	11.0553	23.3884	31.3367	26.561	21.3915	27.4804	28.328	22.2498	33.9865	26.8222	27.0952	1
FBgn0029526	0.0730765	0.0325051	0.131315	0.633542	0.258882	0.232405	0.0705226	0.284306	0.211343	0.810922	0.48833	0.316794	1
FBgn0037151	12.9658	26.0062	49.6731	10.1337	8.31509	10.8505	12.4466	14.1036	6.68554	13.6246	9.22607	9.41997	1
FBgn0019830	133.731	44.9942	34.2397	54.6161	64.9256	50.5625	66.3713	62.065	64.8412	132.472	64.4583	65.644	1
FBgn0019952	16.0797	21.6857	85.8261	2.83452	3.72872	3.69296	3.65894	2.92419	4.42877	6.70031	2.92996	2.96163	1
FBgn0050456	8.65475	11.2124	17.8231	1.34434	1.61084	2.36631	1.0105	0.943804	1.37767	2.59321	0.719249	0.770347	1
FBgn0037614	28.4272	12.879	18.2346	17.6822	15.8346	24.7783	29.6331	19.8744	16.1497	28.9282	15.9986	23.148	1
FBgn0025631	5.16796	8.12387	5.09586	3.10996	1.65735	9.89439	7.96098	4.28275	6.78407	22.3881	5.63595	10.5151	1
FBgn0044823	4.37118	5.65951	12.5624	11.0725	10.4037	12.6897	11.8886	10.7225	8.67772	15.5699	8.70839	10.1278	1
FBgn0027844	237.62	203.145	111.167	8.68638	2.24306	24.186	7.48332	3.34252	2.4661	8.99182	4.03207	2.16862	1
FBgn0051048	1.61178	2.11337	5.08507	2.86457	3.12705	2.93437	2.88166	3.49301	3.74095	5.81575	3.61235	3.75846	1
FBgn0001230	35.8039	79.7685	341.372	18.1471	30.634	64.0101	20.5258	34.1957	54.5553	145.453	17.2215	30.4563	1
FBgn0036091	2.88028	5.21787	0.983521	0.901106	0	1.11495	1.63016	0.205876	1.54633	1.68011	0.384459	0.528755	1
FBgn0035203	27.7232	12.4935	13.5379	42.5248	54.3303	47.1517	49.6476	49.4912	43.909	55.6802	45.3999	40.7903	1
FBgn0035208	0.192077	0.655224	3.56537	2.14391	4.81679	6.9436	9.94735	2.27401	3.04694	26.0457	1.05341	2.20394	1
FBgn0035040	21.722	20.1436	24.0417	0.948856	1.04268	1.41726	1.18439	0.873517	0.71531	17.354	0.916219	0.934207	1
FBgn0038491	7.98441	5.79088	11.2634	16.2108	12.9898	14.6119	18.7377	15.8167	15.0718	18.609	15.8903	13.2363	1
FBgn0038947	182.341	93.0205	141.479	202.135	150.62	237.544	223.148	146.131	190.092	226.21	186.241	186.102	1
FBgn0260659	18.4789	14.7796	22.3515	25.67	30.188	24.2644	31.0628	33.3391	25.271	33.4987	23.3795	22.0206	1
FBgn0031450	12.4298	16.5456	50.7269	17.8155	25.262	14.0421	27.3247	22.0577	26.33	41.9828	20.2746	23.9139	1
FBgn0027106	36.5321	23.3529	13.8728	0.616402	1.32995	0.487699	0.581487	0.795898	0.965358	4.74833	0.679974	1.1412	1
FBgn0034796	6.76341	11.2157	42.3553	16.8792	18.0947	12.5622	16.2689	16.7707	19.2621	24.7447	18.5832	15.9594	1
FBgn0013750	37.3098	31.9336	50.0341	78.2848	83.9818	89.6703	97.0667	75.9163	75.4446	95.2435	76.8809	81.1971	1
FBgn0041147	3.99962	3.26877	5.2015	18.7277	26.155	20.294	19.461	21.2613	15.1552	32.3933	22.8151	16.4072	1
FBgn0023129	73.8037	93.5035	39.064	6.45106	5.56649	12.7396	8.52018	4.53311	10.2802	34.7763	5.28173	15.1772	1
FBgn0030954	0.136327	0.219699	0.870083	0.856133	0.928178	1.11516	1.04521	0.531223	1.11339	1.3529	0.688181	0.479532	1
FBgn0051467	0.533979	0.717834	2.4688	1.80496	1.49049	1.44303	2.21077	2.51379	2.35755	2.7064	1.74566	1.80224	1
FBgn0030341	74.9388	43.6123	57.7026	71.9624	76.3555	70.6071	70.7015	53.116	91.2137	106.059	67.0933	67.6904	1
FBgn0039158	8.78479	5.1923	8.56231	15.0015	17.2398	18.4419	18.2888	17.5131	16.5286	18.5513	17.867	16.2529	1
FBgn0000629	7.87902	6.45805	12.09	24.2841	18.4338	21.389	22.1137	21.0479	22.3658	34.3154	24.0028	15.1515	1
FBgn0037606	6.35838	4.18076	5.91599	7.18981	6.85908	7.53775	7.65612	7.228	6.29168	11.1208	7.42932	7.72716	1
FBgn0065102	9759.11	5406.03	7393.84	16176	15195.2	16703.2	8300.05	16309.7	21477.9	146172	22106.1	3375.66	1
FBgn0030300	7.2008	5.91548	11.5098	2.51059	1.91391	3.52567	1.55985	1.05715	1.18344	4.54518	0.417716	0.457903	1
FBgn0038353	488.353	250.914	410.877	1.39694	5.29894	11.5605	4.63564	1.33007	10.7429	40.5179	2.34852	6.86201	1
FBgn0086558	21.2591	36.3667	164.451	45.1223	37.3979	46.4309	41.7529	36.8818	48.7838	54.2743	40.2608	40.244	1
FBgn0036984	1.03296	1.06189	1.88658	0.609967	0.357087	2.1299	1.26036	0.601074	0.872521	1.18847	0.89207	1.1383	1
FBgn0024947	85.7594	43.349	31.7315	19.432	20.0287	34.9815	28.0254	20.084	22.3331	28.052	20.1316	20.0654	1
FBgn0051368	4.01465	3.77422	6.83197	21.0046	18.2455	15.3715	18.2558	20.8584	19.9709	25.0476	22.0291	15.0368	1
FBgn0031821	25.1131	37.7172	12.7741	1.85404	1.8652	6.09357	3.82861	1.65979	2.5965	3.88112	2.49279	2.86049	1
FBgn0031791	53.4083	82.0568	160.946	1.01952	1.26917	5.25091	2.3594	0.428498	0.831885	2.57329	0.478744	0.922394	1
FBgn0010348	550.993	289.393	516.511	931.859	696.748	826.845	952.2	713.574	828.258	962.79	886.504	778.641	1
FBgn0016034	1.43397	3.50133	8.40574	1.31308	1.02901	1.53899	1.7497	1.02477	0.539657	8.16041	1.11906	0.37851	1
FBgn0040906	0.605275	2.33008	4.82518	0.88527	0.961022	1.05152	1.32356	0.637478	1.27931	2.2508	1.08413	1.88895	1
FBgn0037321	12.6389	8.38687	32.896	17.1269	13.2455	18.2833	17.7639	15.0479	17.997	22.0685	18.1252	13.8399	1
FBgn0001142	144.638	90.6871	555.947	6.17152	20.8674	39.1864	19.9066	4.16199	18.4393	55.8031	3.18796	16.7505	1
FBgn0050284	0.0872621	1.9473	1.8807	0.648338	0.785319	0.411898	0.436855	0.587305	1.64903	30.4576	1.57816	0.2556	1
FBgn0038401	6.68844	1.99259	4.16258	4.88811	4.89285	5.02946	5.17244	5.21989	4.96947	7.69935	4.70989	5.18429	1
FBgn0004648	21.0128	32.8746	61.1606	27.5767	31.8732	22.7212	25.6595	29.4209	36.7872	55.1995	35.0097	35.6357	1
FBgn0035244	38.9678	15.0097	16.8022	17.661	13.8071	24.2278	21.9156	18.3142	16.8699	35.9608	19.0199	16.1905	1
FBgn0023441	15.7226	16.6323	26.3783	36.4002	38.0309	27.9818	30.1283	39.4006	38.0279	58.2845	36.7893	33.4259	1
FBgn0037218	13.6243	11.5579	17.1983	17.8013	20.2198	18.1575	18.4725	19.7332	18.7449	22.3207	21.4809	16.2423	1
FBgn0031360	85.9323	48.3341	36.057	32.2575	25.7447	26.8138	27.1462	27.5669	29.1696	32.716	22.7211	24.5233	1
FBgn0039936	19.107	17.6774	31.5787	50.8897	52.8773	50.6643	55.284	57.2505	61.9285	58.9969	52.5532	51.5642	1
FBgn0034535	17.4744	10.0924	16.504	10.875	11.1853	12.8584	12.8019	9.9025	10.5258	13.5616	10.5716	10.9343	1
FBgn0015797	61.6947	67.667	82.8641	61.5845	75.0058	71.9795	67.433	55.0988	75.2629	96.1519	64.4662	63.8642	1
FBgn0051344	4.40256	6.7098	14.1229	15.5096	15.1216	14.2576	13.4341	15.3268	16.38	28.7672	14.8769	12.0065	1
FBgn0260990	15.7055	12.2581	21.5176	16.1339	17.0911	15.4325	16.6134	18.273	22.5107	26.2474	19.3034	19.3713	1
FBgn0035173	16.4892	11.0152	18.632	2.41754	4.74904	3.22166	3.23502	2.72694	2.3151	7.02525	2.83407	1.70066	1
FBgn0050334	28.1239	3.08807	25.0486	1.42429	8.8129	47.818	23.3887	0.77063	2.03068	46.6319	1.45865	2.16562	1
FBgn0029688	19.3127	13.4506	15.5527	13.2353	14.1024	13.5519	12.5421	13.2993	14.9977	20.6289	13.9871	13.3387	1
FBgn0031779	13.3337	10.0464	12.1237	10.5281	10.6654	8.80351	9.69173	8.4262	12.9974	15.2468	9.92329	9.92029	1
FBgn0000183	18.5706	14.4148	17.0139	23.7353	25.2629	20.1321	26.823	27.0975	27.7757	31.6987	25.5395	25.3433	1
FBgn0034743	1916.22	1332.36	1454.34	2739.84	2205.35	2585.26	3980.36	3897.74	2868.21	4258.8	2829.73	3653.72	1
FBgn0029897	2671.94	1317.86	1577.46	2439.23	2207.64	2637.84	2499.56	2625.43	2709.44	2788.09	2645.45	2366.55	1
FBgn0001296	3.32824	7.27001	11.1098	2.70698	4.56509	4.35012	3.86604	3.00036	4.67688	10.284	3.35878	3.85083	1
FBgn0028741	4.72876	5.02045	9.43374	7.89191	8.16142	10.7292	8.16709	8.82102	8.2318	9.08494	8.57451	7.04568	1
FBgn0053527	22.613	7.13902	8.44469	13.83	17.078	12.265	13.6852	24.2904	5.82095	62.5337	4.53952	19.3158	1
FBgn0030435	20.3866	15.7486	22.7187	21.0694	20.2798	23.9254	18.8582	18.4455	24.0459	31.9086	21.7283	19.8111	1
FBgn0030349	24.251	12.343	14.7503	18.8641	19.5356	21.9082	21.606	19.5951	22.3153	25.1209	17.8893	19.0072	1
FBgn0086663	3.48938	18.7149	27.8427	8.07413	4.01261	4.1185	2.59339	4.51999	6.67722	27.8656	3.53142	6.04657	1
FBgn0085437	8.06953	7.0352	12.7869	10.5492	12.4486	9.10898	10.274	12.0951	15.1328	21.4282	12.4409	11.4862	1
FBgn0262203	75.6251	93.1011	222.236	321.504	124.917	240.366	312.194	313.235	232.251	560.195	367.553	348.728	1
FBgn0036482	0.177998	0.921577	5.25398	0.919709	0.0619259	0.51489	0.0444137	0.0565539	0.132805	2.51851	0.738616	0.628837	1
FBgn0053208	10.11	8.48989	27.9509	12.0934	13.2047	12.9376	12.0333	12.6562	14.4171	21.1001	14.1524	10.9823	1
FBgn0028538	13.7952	12.5835	20.2671	12.4744	12.8218	10.6006	11.1676	13.5078	13.9507	16.1913	13.2436	12.25	1
FBgn0035704	3.02688	3.97956	6.1568	6.31435	6.76861	5.47465	6.35418	7.50786	6.85069	8.12879	6.32105	7.12093	1
FBgn0031285	90.985	119.159	248.632	97.1165	94.681	87.8372	90.2206	92.2553	116.093	130.251	103.223	105.913	1
FBgn0025878	1.22291	1.34218	2.57599	2.21729	1.8436	4.41095	1.52605	1.49427	1.55671	3.21544	1.87622	1.95846	1
FBgn0051119	0.452966	1.98487	4.07674	2.86158	2.14029	2.18217	0.969524	1.65971	3.09082	9.98515	2.30798	1.5063	1
FBgn0041096	1.93198	1.75296	5.43184	20.1346	21.6754	19.9823	23.7229	23.2025	28.2966	30.973	21.4591	22.3856	1
FBgn0261561	10.1619	16.6943	33.6636	10.1665	7.96033	16.1381	9.97036	7.9643	7.1116	20.8731	3.22791	2.89434	1
FBgn0041712	10.8974	11.6891	1.77856	1.92934	1.73168	10.6305	1.67083	0.545748	1.70166	2.2467	1.56602	1.50094	1
FBgn0083012	27.5937	7.43004	24.898	25.9366	13.8769	30.9386	42.3099	23.5322	34.9115	50.3029	26.6935	18.609	1
FBgn0083015	75.6206	19.6803	97.8862	181.951	16.5624	142.744	480.195	211.668	208.696	443.597	76.3093	300.965	1
FBgn0025469	7.35723	8.35393	11.9011	13.7387	14.9718	12.7406	12.5239	13.2565	15.3732	19.5352	14.5291	11.4102	1
FBgn0032850	3.82633	6.22139	6.10399	0.863691	0.029817	1.39788	0.735959	0.101178	0.980351	4.20515	0.131183	1.30198	1
FBgn0037911	9.92128	9.83305	10.6251	9.36419	9.69714	7.84469	9.82585	8.01183	8.06569	14.6141	8.21387	9.89909	1
FBgn0030411	5.32901	2.21991	3.20219	3.50279	2.57363	4.47002	4.42892	3.58009	4.17231	4.38908	4.05901	3.31513	1
FBgn0036849	0.24727	0.300307	0.669456	0.531459	0.830841	0.741942	0.932919	0.19384	0.337891	1.26772	0.501953	0.242886	1
FBgn0036992	149.914	15.0282	2.29407	3.48331	3.33924	5.13893	5.08804	8.22399	4.36917	7.49633	5.15763	4.44376	1
FBgn0261285	15.9626	7.36822	8.22208	7.55414	7.47953	7.32543	7.04129	8.00658	8.2681	9.20412	6.94629	6.62572	1
FBgn0032014	15.4054	11.9345	21.1856	20.6702	21.4986	23.7474	24.0669	18.8155	23.0304	30.7242	22.4435	21.7678	1
FBgn0020762	8.24013	6.15282	15.0361	8.5561	6.36647	9.27849	9.58843	7.71827	8.14437	11.316	5.28307	9.20867	1
FBgn0035762	10.1983	5.84029	5.24791	16.1592	11.3145	13.6963	14.8606	10.9855	15.6754	19.432	13.0336	11.5396	1
FBgn0052573	0.383417	0.939405	14.5275	0.955956	0.455053	0.501211	0.682919	0.0759251	0.46524	9.98618	0.732604	0.427198	1
FBgn0039099	1.1958	8.50277	78.5391	2.20259	5.45517	3.95704	3.53183	1.95238	3.28748	11.2935	0.46155	2.01047	1
FBgn0029824	1.56638	1.27013	2.25022	1.89808	1.05052	3.06224	1.76503	1.22925	2.64735	5.87154	1.29696	3.49148	1
FBgn0034968	3559.84	2205.22	2205.36	4090.2	3896.7	3638.64	5480.31	5077.61	4149.92	5290.01	4195.56	4794.08	1
FBgn0001122	15.3112	11.871	31.7327	37.783	30.6527	43.3798	37.6315	28.3832	35.6207	40.468	39.2241	37.4468	1
FBgn0262405	2.87971	5.34381	22.787	94.2222	68.4046	45.5671	68.1442	41.2527	84.8095	124.031	85.9902	86.2419	1
FBgn0083037	0	0	0	4.8134	11.6278	0	3.69119	0	0	23.2449	2.9899	2.27972	1
FBgn0262432	591.333	58.5964	0	123.342	363.864	514.113	386.02	94.4893	194.131	430.721	175.391	153.417	1
FBgn0002787	80.54	74.5245	215.509	142.553	136.534	130.697	143.393	135.407	148.841	162.26	141.045	131.224	1
FBgn0263470	15.9085	4.74631	9.64666	18.5306	15.3182	14.6587	24.4334	22.1623	19.4497	44.6502	12.5592	32.8186	1
FBgn0038603	8.90042	13.379	17.3708	31.5783	32.9203	25.4553	28.4701	33.6645	39.7076	59.9888	39.0382	34.1436	1
FBgn0053052	9.11641	5.77568	10.5258	31.3877	31.3845	25.1265	32.0693	34.8309	34.2659	37.3764	31.6126	34.5742	1
FBgn0010383	12.7596	3.82005	5.89155	2.09706	2.45637	18.6059	12.7943	0.745319	1.14229	15.0131	0.149001	0.977282	1
FBgn0085388	5.7081	4.19809	7.92862	4.65422	4.15094	5.56487	4.94057	3.38375	3.83854	6.96591	3.21265	3.78205	1
FBgn0027079	33.7994	13.3133	14.7651	30.5831	30.8509	34.8267	39.4573	31.4272	30.2157	39.5915	32.2516	25.9551	1
FBgn0027070	8.26374	9.2567	4.16865	1.18598	0.71737	3.23595	2.0038	0.648219	0.384055	5.25974	0.505814	0.554291	1
FBgn0263278	12.755	6.97485	11.8044	7.44732	6.69416	7.98931	6.5749	6.97511	9.65463	10.9407	8.4415	7.1653	1
FBgn0263110	4.23621	4.06723	5.24061	6.95841	7.10847	5.82416	7.32416	8.05364	7.61431	7.72053	7.23521	6.72192	1
FBgn0263115	23.5601	8.20156	12.0205	8.72777	6.27041	20.5047	18.6245	11.5571	16.8975	22.8076	13.5082	14.9584	1
FBgn0032297	8.27989	34.0862	32.1472	12.7016	14.7722	24.1207	19.9039	15.8125	14.9353	35.6339	11.9972	35.0844	1
FBgn0028394	14.3241	10.627	25.9975	2.29244	8.11525	6.83108	13.6371	1.82084	5.31426	30.2556	1.98821	6.17814	1
FBgn0028396	63.3556	579.314	745.919	13.1135	1.3082	23.779	9.56709	4.12812	2.39996	14.2472	12.5294	7.8105	1
FBgn0030590	0.199725	0.0441429	0.69865	0.901503	0.661789	3.0566	0.8231	0.637904	1.53006	8.86735	0.743141	2.05369	1
FBgn0033247	12.7917	12.8138	15.2356	40.4542	48.5865	32.9681	40.8618	48.9288	35.7189	79.2407	42.8497	33.103	1
FBgn0014380	51.3747	45.6444	60.4211	18.5905	13.8016	16.2	18.2288	16.0441	22.6621	29.8543	14.4955	20.0064	1
FBgn0032449	9.47797	2.82002	4.30667	1.38301	1.18331	2.46514	1.46039	0.892185	1.38687	2.16893	0.893799	1.04917	1
FBgn0032197	3.16314	6.95152	10.6411	18.5222	22.0828	18.8941	24.2405	23.1639	17.5633	27.6933	21.9817	26.1136	1
FBgn0086662	39.1853	24.5664	11.673	19.807	30.2563	31.8295	22.8121	5.51066	26.5944	46.6452	40.9293	20.4486	1
FBgn0051323	2.4204	3.61513	5.80209	0.645722	1.9463	1.75046	1.08163	0.675146	0.760107	2.68511	0.28749	0.365101	1
FBgn0042213	15.5236	16.4893	16.5342	31.5382	35.6805	35.7731	38.7329	34.851	32.1352	46.0475	30.1918	33.5653	1
FBgn0025111	3.53669	10.003	15.4892	3.24588	2.34037	3.81457	3.29445	4.20445	4.91937	5.98114	3.16468	2.72633	1
FBgn0040660	730.05	711.271	788.401	562.089	618.041	528.215	794.25	685.53	525.669	759.865	483.062	714.742	1
FBgn0051523	63.1384	35.8851	92.7909	46.8962	43.7686	67.8189	60.4545	43.1786	40.7958	75.1648	42.9232	39.971	1
FBgn0039681	19.7732	11.8804	5.62583	2.14923	6.51693	7.30987	5.24003	2.02533	1.19171	22.533	3.05622	1.29852	1
FBgn0039683	0.603087	0.873384	2.02861	1.00003	0.680694	3.37986	1.2013	0.496044	0.290066	1.5757	0.369734	0.224953	1
FBgn0033907	157.588	98.1341	25.7717	104.576	129.521	207.727	164.776	124.349	159.145	345.022	159.252	117.24	1
FBgn0052537	2.7615	1.75605	2.74401	3.90146	3.88418	3.04071	3.30663	3.66472	4.56664	5.33597	4.39594	3.62486	1
FBgn0082978	13.3879	9.61589	40.6344	59.5187	3.19223e-153	47.0838	76.4504	48.4449	23.1132	119.907	41.4777	30.0841	1
FBgn0259212	5.4772	6.532	15.0952	23.5585	21.5841	24.5247	27.1269	25.2055	30.0353	29.5246	25.9534	23.9989	1
FBgn0015816	37.4708	19.5017	31.6002	31.3965	31.4415	31.2057	32.5389	27.0786	36.3776	42.4084	31.8685	29.8526	1
FBgn0263539	0	1.8624	0	3.38613	0	1.62347	0	0	13.0051	50.464	2.44816	2.82906	1
FBgn0027608	8.61963	12.3741	26.5384	2.80736	2.19589	4.73027	4.60592	2.18261	1.52746	14.8609	0.960503	1.26858	1
FBgn0031990	24.0664	17.1555	16.9589	11.0073	13.3721	13.4988	13.7265	13.2709	13.7874	20.3221	12.9824	12.3195	1
FBgn0030028	0.739702	4.5625	2.329	1.44045	2.23014	1.49384	0.891221	1.2009	1.47969	7.75688	1.33319	0.815211	1
FBgn0032172	16.7976	16.2285	31.6107	21.8691	26.5444	20.9477	20.7981	22.7418	29.7943	46.429	24.5699	25.432	1
FBgn0086134	135.904	132.257	310.077	303.847	300.501	256.823	315.024	286.54	263.497	321.293	281.212	276.127	1
FBgn0003742	30.5515	13.4841	26.9484	54.1541	38.5532	47.8282	52.6976	52.8902	53.7707	69.6682	60.9554	42.4434	1
FBgn0003210	11.509	9.83867	17.2721	32.8435	32.9142	24.9861	32.4502	33.1914	33.0907	42.0464	33.1706	36.9252	1
FBgn0035334	202.642	78.7431	137.334	142.037	93.5412	166.285	132.409	93.102	119.236	131.491	106.964	107.116	1
FBgn0263705	4.59397	2.80514	5.10988	15.3982	19.0773	12.2303	13.0247	14.168	19.1527	36.1167	14.725	16.1849	1
FBgn0250816	1.38361	2.31472	1.3365	1.02493	1.17757	0.717911	1.19125	1.18582	0.61304	11.0268	0.870174	1.05763	1
FBgn0260936	20.9205	16.9089	38.7513	33.5002	35.902	31.4384	38.6495	35.8037	39.6936	45.7295	40.9122	31.2729	1
FBgn0031362	7.07191	5.44752	13.4426	7.10988	5.39306	7.32034	5.76582	5.23219	3.67591	8.60027	3.47417	5.39618	1
FBgn0029990	392.872	622.601	1501.17	5.51611	0.00698333	92.2663	44.5915	1.75724	2.43626	43.1684	5.94199	6.78611	1
FBgn0038787	26.4799	18.6746	32.5223	55.5062	57.0941	47.2082	63.8693	61.8949	57.9084	66.7857	57.2517	64.4285	1
FBgn0036213	1557.95	1137.76	1093.26	1873.23	2107.86	1933.2	2482.93	2477.14	2212.11	2437.72	2054.84	2338.53	1
FBgn0261341	601.124	199.349	71.4401	196.117	227.017	310.941	206.985	165.388	215.097	401.167	178.98	164.547	1
FBgn0037603	13.7813	52.4772	22.8568	14.9467	17.6395	14.831	16.7687	18.0401	19.0385	24.9758	15.4655	19.1702	1
FBgn0038126	34.8333	19.8788	18.7659	43.2541	36.508	50.4832	38.1953	33.3521	33.7233	61.4757	25.6045	65.3647	1
FBgn0034364	28.4288	23.854	16.6831	4.92339	0.754736	25.2488	16.0552	0.422683	0.318624	20.3372	4.22831	0.262976	1
FBgn0034063	4.34694	8.51744	20.3158	17.3144	18.1144	13.2452	14.7164	18.338	21.2567	37.3853	20.2718	17.328	1
FBgn0033949	43.12	25.7867	30.7718	4.72697	10.8296	27.229	17.4103	4.257	17.8678	12.5844	8.26418	9.76146	1
FBgn0038194	186.413	165.698	159.735	0.883956	0.645265	4.23536	2.61691	0.0914573	0.201523	2.52387	4.61408	0.355274	1
FBgn0038221	0.442339	0.903263	1.74566	0.894551	0.807734	0.807704	0.748792	0.76829	1.63966	2.20587	1.14623	1.09929	1
FBgn0035890	4.25691	3.40758	6.47412	10.6101	8.3587	7.70947	12.8685	12.9033	6.2136	18.7087	7.24209	12.101	1
FBgn0003023	11.6949	40.2153	4.76313	4.39786	10.93	5.10673	5.14945	6.44668	4.39513	24.2561	4.12458	5.53983	1
FBgn0022787	6.65087	7.1667	13.0995	16.3751	15.4576	14.995	16.5081	18.9912	20.4772	22.4449	20.3319	16.0349	1
FBgn0031952	5.98921	7.93978	18.2523	12.6261	11.9613	14.8803	13.2259	11.17	13.412	16.4239	11.6016	14.8615	1
FBgn0033886	64.8996	79.9154	176.924	100.834	115.701	88.5117	109.303	113.157	108.81	134.104	105.652	85.1851	1
FBgn0051710	9.49274	12.5278	26.0861	24.9442	31.9795	20.7187	37.4759	28.7818	30.3561	77.8662	21.3706	43.7292	1
FBgn0037744	99.7086	46.8317	33.716	33.0109	18.5829	32.6617	29.5059	23.3362	26.9933	35.312	21.4982	21.8012	1
FBgn0083969	9.71087	9.00345	17.1501	10.8923	10.2071	10.9595	9.53247	11.1336	10.6881	12.0452	10.6626	9.75834	1
FBgn0069242	36.6939	25.4926	17.1661	17.3237	19.0136	17.1172	21.6684	20.1099	21.0984	38.2327	19.1774	27.8912	1
FBgn0041342	52.888	41.9165	38.0448	22.6167	21.1981	28.0584	28.7586	27.6083	24.9197	38.7257	25.475	28.9268	1
FBgn0033177	2.48258	5.7569	19.3554	8.93583	8.29099	7.09046	6.54564	7.87717	10.3544	17.6357	7.92065	6.33081	1
FBgn0058006	5.21187	3.89671	6.09764	1.94065	1.44956	9.16064	4.35993	0.366222	1.11338	3.71651	0.518822	3.35178	1
FBgn0011653	0.883957	2.27198	4.96922	25.0987	26.9786	15.2957	18.5385	29.1906	33.2278	73.303	36.7062	35.596	1
FBgn0000084	16.1142	23.4728	38.5376	24.0274	21.9385	27.0194	21.7608	23.2673	22.9098	33.3637	18.4038	27.0566	1
FBgn0004511	0.00675569	0.0689604	0.367167	0.349478	1.28311	0.766437	0.677333	0.696542	2.06694	13.6537	1.3684	3.91253	1
FBgn0027527	9.16598	0.109204	0.482203	0.336539	0.745498	88.6453	14.4149	0.954256	5.1458	23.9226	1.31561	6.87369	1
FBgn0085272	0.492011	1.0414	3.33091	0.3727	0.520792	1.13967	0.430355	0.296108	0.259978	1.21974	0	0.231093	1
FBgn0000451	2.1206	3.7978	6.01575	0.194799	1.29717	7.94747	4.01348	1.09308	5.0579	38.6513	2.12062	7.54845	1
FBgn0262237	1.64976	1.94572	1.60322	0	0.830841	0	1.82434	0	7.63017	35.8432	3.81682	3.55062	1
FBgn0028567	0.596811	8.98178	85.4787	0	0.744338	0.281133	0.118664	0.194114	0.187127	2.10942	0.175126	0.182537	1
FBgn0030449	0.110971	2.5153	2.74048	0.451267	0.535073	0.281046	0.259702	0.355761	0.414454	0.831356	0.144426	0.0853408	1
FBgn0037616	0.851462	7.17675	19.8567	0.399562	0.512479	0.0506074	0.109419	0.8741	0.105944	0.993286	0.0795889	0.0790389	1
FBgn0037414	1.0452	0.156409	0.275045	0.340341	1.25435	45.6786	11.1199	1.41211	5.90603	55.9123	2.90706	10.5475	1
FBgn0037396	0.0190574	3.83588	85.8941	0.0202715	0.618615	0.0220718	0	0	0.120839	6.61432	0.0182051	1.30845	1
FBgn0034692	0.868162	2.02723	0.167999	0.186503	0.707905	0.911555	1.01321	2.0329	0.362236	5.82986	1.00962	1.38534	1
FBgn0038435	0.0477308	0.0968115	0.247159	0.0239383	0.59608	0.261626	0.110205	0.301701	0.576735	3.96272	0.0107089	0.881282	1
FBgn0063083	0.893089	0.785841	1.49395	0	3.78133	21.5145	12.4987	0	0.943815	19.4837	0	3.34461	1
FBgn0035434	7.59082	5.75798	1.50513	0.139213	5.9107	1.81893	1.71713	0.157531	0.829858	120.697	0.750137	17.4268	1
FBgn0035430	0.110159	0.877547	3.92153	0.244045	1.16297	1.88013	0.341546	0.195065	0.931921	8.63917	0.0733465	0.827985	1
FBgn0086041	0	0	0	0	34.8123	69.7553	89.0356	0	0	110.761	23.6996	0	1
FBgn0259950	0	88.738	288.337	0.260432	0.741131	0	0	0	0.152793	91.0398	0.157394	5.02793	1
FBgn0026874	0.030198	0.82278	0.0423383	0.0530984	1.36465	0.267623	0.135759	0.135808	0.11005	5.6574	0.213877	0.0624702	1
FBgn0262867	1.72991	0.405606	2.33315	0.232361	0.65159	6.28023	2.1023	0.428304	1.5678	2.45859	0.523956	1.82339	1
FBgn0040682	0.123519	0.181143	0.129138	0.131387	1.68515	0.143056	0.10804	0	1.08779	13.0651	0.0786629	0.856622	1
FBgn0004589	0	0.470018	0.489252	0	0.506895	0	0.0628398	0	0	77.571	0	0.0747092	1
FBgn0030798	0.578144	4.16735	7.85618	0.245622	0.741346	1.34589	0.67739	0.175003	0.400986	0.909816	0.0865372	0.229899	1
FBgn0262111	1.24749	0.223411	0.396998	0.445069	1.31041	2.52217	0.80755	0.857213	1.31976	7.58058	1.1043	1.5684	1
FBgn0032665	73.5451	41.4279	62.3303	0.199493	0.635254	1.58902	0.918645	0.0451484	0.0792793	1.85978	0.752464	0.156079	1
FBgn0036481	0.753153	2.97727	14.9177	0.0552991	3.10311	0.0863161	4.18134	1.98494	3.48846	7.34236	0.697614	1.54239	1
FBgn0032856	0.209302	0.317161	0.849593	0.253055	0.920619	1.50058	1.52492	0.249403	0.628204	1.61605	0.179554	1.46895	1
FBgn0033756	0.29778	0.709423	1.68759	0.4236	0.848265	0.8329	0.645912	0.49148	0.743361	1.74489	0.726867	0.899034	1
FBgn0037013	0.254485	0.316647	1.15977	0.0983902	0.532415	0.145155	0.192398	0.146	0.257661	0.982355	0.0538487	0.102614	1
FBgn0033904	14.2125	7.44129	0.889001	0.475584	0.831535	1.29797	0.771745	1.01284	0.776702	2.7356	1.354	1.02929	1
FBgn0036351	6.56122	0.536249	0.772035	0.183091	1.77775	54.1652	26.3474	0.562349	1.61113	33.4057	0.140938	2.27659	1
FBgn0038762	4.3757	20.2939	82.2722	0.32037	0.90949	1.43096	0.702483	0.196916	0.254153	6.83294	0.0839336	0.812466	1
FBgn0037730	1.72796	17.9857	42.5541	0.315948	0.630084	0.257545	0.361596	0.319535	0.5005	1.22623	0.469919	0.577791	1
FBgn0034045	17.9566	4.26547	3.29905	0.320889	0.756353	1.39676	0.923931	0.0556808	0.219762	1.43961	2.24202e-13	0.325703	1
FBgn0051907	0.910894	5.18405	22.9104	0.145162	0.201653	0.78001	0.745493	0.40234	0.504721	0.967085	0.262405	0.479247	1
FBgn0029573	0.810002	0.509094	0.0568648	0.188012	0.398403	5.72369	0.680971	0.557125	0.0741516	0.76498	0.51585	0.373901	1
FBgn0004514	0.550871	0.169405	0.371327	0.289813	0.461594	2.34967	1.23081	0.111478	0.212949	1.18614	0.0516005	0.0678167	1
FBgn0259716	9.55739	27.7063	65.9157	0.0739301	0.206686	1.15536	0.584621	0.0528557	0.0479035	1.16549	0.157269	0.257491	1
FBgn0031520	3.85974	1.4209	2.17619	0.197303	2.67119e-146	0.397638	0.67434	0.43991	0.488241	1.0444	0.851601	0.376154	1
FBgn0263384	0.228443	0.251263	1.39321	0.283495	0.483612	2.2489	0.63275	0.137484	0.120709	0.755109	0.218226	0.871359	1
FBgn0025642	0.164751	0.696953	3.20647	0.269609	0.160974	0.484363	0.53208	0.244067	0.562503	0.502686	0.157382	0.276854	1
FBgn0085223	58.3341	37.1946	21.1472	0.179328	0	0.488136	0.663577	0.293347	0.178164	0.835892	0.724717	0.526134	1
FBgn0262481	9.16901	87.4026	86.2677	0	0	9.73435	4.01	0	0.807482	7.57694	2.18973	1.58971	1
FBgn0261262	2.61166	1.74618	3.45631	0.40527	0.0894009	4.0369	1.06777	0.772823	0.162932	1.25097	0.774787	0.232635	1
FBgn0260642	7.29095	6.84277	12.4133	0.229859	0.107518	1.34913	0.636713	0.47545	0.191397	1.05431	0.195253	0.136192	1
FBgn0050413	26.1922	6.55171	4.33746	0.115535	0.0766461	5.4721	0.675092	0.261473	0.172177	1.21	0.259394	0.495194	1
FBgn0051084	0.0725019	0.0631005	0.061942	0.0576846	0	0.0847443	0.529991	0.0774294	0	1.52677	0.0807211	0	1
FBgn0028896	0.191192	3.53287	14.472	0.325394	0.323801	0.265719	0.702376	0.414234	0.363692	1.51674	0.292225	0.358005	1
FBgn0037992	0.0361629	0.0396384	0.0448075	0.496853	0.102533	6.03396	0.913642	0.0517521	1.01691	20.7457	0.0544532	1.301	1
FBgn0051105	0.137135	0.456604	0.749436	0.0123409	0.0982438	1.12289	0.815166	0	0.43602	1.92071	0.163527	0.446064	1
FBgn0032651	0.426801	1.24455	4.31401	0.021496	0.0790605	1.9937	0.513062	0.21691	0.170394	2.87953	0.413314	0.648687	1
FBgn0038897	6.85699	3.80182	3.72127	0.268332	0.477587	1.06593	1.0437	0.445979	0.604711	0.8542	0.611273	0.870509	1
FBgn0036046	8.19194	10.0352	7.4012	0.0871927	0	24.0372	0.988309	0.0669849	0.179053	4.22396	0.727056	0.0990551	1
FBgn0036877	2.88434	2.81178	6.53369	0.246767	0.344644	3.30907	1.70877	0	0.154841	13.8029	0.0816468	0.101613	1
FBgn0036620	16.3197	3.15482	3.80019	0.157812	0.13959	3.1788	1.43549	0.0297626	0.601017	1.9616	0.0944834	0.720233	1
FBgn0024366	1.73575	0.765043	0.855797	0.328582	0.47884	3.56293	1.11823	0.48272	1.12082	4.9748	0.642756	1.93822	1
FBgn0050026	2.1799	1.36083	2.43306	0	0.0831503	1.09176	0.541099	0.106373	0.0933939	1.16847	0.0562813	0.0306445	1
FBgn0038818	0.900316	2.08159	8.28389	0.246858	0.319595	0.938208	0.501239	0.307653	0.210552	0.749796	0.761299	0.304157	1
FBgn0041780	0.891962	0.873693	1.08411	0.436193	0.386791	0.329707	0.625711	0.310007	0.342669	0.780455	0.328759	0.502647	1
FBgn0261584	5.11856	1.92795	1.84212	0.339441	0.486402	1.9662	0.893193	0.460924	0.701336	1.01262	0.951102	0.402786	1
FBgn0033058	0.260255	0.538611	0.888527	0.482189	0.464601	1.03253	1.16478	0.407929	0.41355	1.46527	0.226949	0.394095	1
FBgn0000355	1.01814	1.11984	0.295683	0.120333	0.478977	2.6204	0.544226	0.0680831	0.943102	1.12181	0.162101	0.117683	1
FBgn0032100	0.410724	1.04817	1.61282	0.477213	0.363784	1.3247	0.854108	0.404583	0.773878	2.62391	0.657652	0.979375	1
FBgn0039500	1.66996	0.539151	0.275939	0.177468	0.488339	1.56958	0.58871	0.242948	0.304722	0.530713	0.151125	0.101937	1
FBgn0000527	1.63974	0.263062	0.37028	0.0538186	0.0739541	12.363	2.35887	0.0261161	0.0647028	2.13459	0.0200755	0.0765176	1
FBgn0037547	6.28817	4.88966	4.98087	0.331845	0	0.39519	0.545753	0.504589	0.0103028	0.773406	0.0838177	0	1
FBgn0052814	0.0201186	0.0751547	0.0206264	0.22816	0.0106314	0.387731	0.500995	0.471083	0.260584	1.00027	0.433089	0.149029	1
FBgn0030425	14.9856	14.0047	7.28017	0.479974	0.247931	1.6049	1.14369	0.082632	0.4344	2.86012	0.320446	1.46722	1
FBgn0038102	0.542255	1.79428	3.22295	0.494344	0.492454	2.46798e-05	1.05239	0.605028	0.399219	3.04985	0.1433	0.869215	1
FBgn0015010	46.0615	35.3178	53.2189	0.337659	0.29222	6.42099	3.78291	0.103694	0.126952	14.8139	0.240486	0.358753	1
FBgn0052695	94.3099	123.237	105.596	0.0232123	0	3.28314	3.82366	0.0387557	5.74409e-313	4.1967	0.317106	0.316757	1
FBgn0261508	180.399	27.5299	619.719	0	0	3.37038	3.88261	0	0.925925	2.34735	0	1.03397	1
FBgn0035031	0.43782	0.248811	0.167861	0.216432	0.484203	0.342852	0.61709	0.239901	0.384493	0.506461	0.388462	0.425893	1
FBgn0031865	31.3373	21.4687	48.7277	0.429161	0.451875	0.935928	0.59533	0.210377	0.328756	0.73451	0.434436	0.202548	1
FBgn0032770	20.5134	9.69533	13.9009	0.203807	0.169585	0.922751	0.867967	0.0538132	0.203545	1.33002	0.113577	0.681137	1
FBgn0085488	3.65767	5.68053	13.9758	0.0659236	0.0874679	1.17238	0.885415	0.0830223	0.720452	1.02429	0.282845	0.801231	1
FBgn0053128	462.669	451.035	600.241	0.0969898	0	1.67206	0.983643	0.109751	0.27302	0.753489	0.304861	0.221325	1
FBgn0083228	3.1532	1.60457	1.94106	0.414644	0.41478	2.25363	1.08094	0.0693404	0.557149	1.2717	0.0354952	0.356202	1
FBgn0041194	7.63653	36.2084	76.6521	0.272778	0.104904	0.544593	0.572952	0.189634	0.0566782	1.55298	0.358372	0.217428	1
FBgn0051665	0.74255	0.437724	1.4316	0.0785248	0.100719	1.52013	0.51564	0.270567	0.00379277	0.870358	0.0221375	0.00400679	1
FBgn0260474	0	0.219226	0.573445	0.264386	0.0700589	0.310933	0.853615	1.7132	0.873197	3.19372	2.68421	0.816896	1
FBgn0029681	0.243646	0.207865	0.211979	0.103741	0.0633753	5.06954	0.961206	0.110565	0.169504	1.37159	0.151005	0.248869	1
FBgn0031012	18.5626	13.9318	11.1632	0.0248377	0.00766128	1.66754	0.710357	0.180212	0.00357543	0.668105	0.0305468	0.0232265	1
FBgn0030348	0.289007	0.28976	0.156134	0.0953292	0.0858142	0.559327	0.683738	0.162051	0.0678879	1.38323	0.116738	0.0794428	1
FBgn0037448	0.910745	0.134394	4.0754	0.0693866	0.355868	0.421364	0.761851	0.0295673	0.128822	0.736395	0.0210836	0.0186623	1
FBgn0028704	1.70235	1.18385	2.0984	0.492421	0.0846622	2.51749	0.941571	0.825308	0.253644	1.01181	0.579652	0.271001	1
FBgn0046876	4.25787	2.95505	70.5985	0.0748786	0.100303	0.790468	0.782669	0.158097	0.0600074	6.86372	0.117596	0.278688	1
FBgn0261089	1.07576	2.76732	1.85704	0.262455	0.176157	0.907209	0.586823	0.235371	0.164985	0.716665	0.254006	0.32565	1
FBgn0033787	497.582	156.121	91.8059	0.496559	0.0806499	8.66988	2.95071	0.299088	0.586877	3.39568	0.90897	0.434868	1
FBgn0034493	0.461904	0.652177	2.19227	0.231985	0.348213	0.790617	0.593592	0.278975	0.301243	0.737598	0.361984	0.348039	1
FBgn0032151	0.789847	0.888565	5.23164	0.273642	0.325774	1.68962	1.44289	1.80436	1.27767	6.32079	1.58922	0.500597	1
FBgn0030764	0.206992	2.68858	6.13841	0.0760921	0.432476	0.680823	0.610292	0.497897	0.316924	0.809908	0.628538	0.606518	1
FBgn0033359	0.177705	0.212513	0.260624	0.292952	0.227325	1.15758	0.533612	0.923794	1.18917	5.74665	1.30838	1.38446	1
FBgn0030575	12.7327	10.5215	9.58941	0.10472	0.463145	2.12838	0.875468	0.177748	0.364141	0.650836	0.282137	0.409655	1
FBgn0031568	0.868871	1.06748	4.75123	0.420871	0.464706	1.33246	0.518972	0.118682	0.301026	1.19505	0.0470956	0.11496	1
FBgn0038579	0.313598	0.116408	0.411687	0.496472	0.486401	0.428848	0.129067	1.07544	0.578163	1.17045	0.364181	0.236884	1
FBgn0262479	0.539003	6.81772	14.4638	0.191113	0.126785	0	0.235729	0.865037	0	0.890826	0.171632	0.654163	1
FBgn0032362	0.246585	0.177421	0.212709	0.497647	0.479513	1.60426	0.439925	0.645711	0.57255	1.68687	0.999626	0.585989	1
FBgn0261841	0.144562	0.00118353	0.0696008	0.0086231	4.00169e-10	0.0297415	0.429911	0.5397	4.22277e-09	1.70504	1.56593e-06	0.00554439	1
FBgn0085482	0.415164	1.00337	0.379922	0.23895	0.347727	0.253754	0.449031	1.10151	0.44004	1.04709	0.315184	0.409042	1
FBgn0053644	0.169273	0.026314	8.13959e-101	0.386696	0.00928474	0.541654	0.0641084	1.17527	0.12947	0.998944	0.0125015	0.0763679	1
FBgn0063298	0.00016799	0.421495	2.25099	6.80266e-22	0.432615	0.000488022	9.59827e-20	0.530345	1.56614	3.8386	0.0874177	0.260985	1
FBgn0053690	0.0569271	0.125227	0.238068	0.0605535	0.321371	0	0.29876	0.548168	0.0601604	0.56451	0.0543811	0.11844	1
FBgn0052450	0.265196	5.33369	18.9501	0.296112	0.0977969	0.0155683	0.159185	0.54582	0.158463	1.51294	0.0840829	0.210802	1
FBgn0034736	3.86932	3.54353	3.89489	0.347478	0.0671485	0.941476	0.455488	0.75021	0.490471	1.05777	0.578873	0.463803	1
FBgn0036352	0.0401915	0.132619	0.12606	0.0855036	0.0850851	0.581858	0.404281	0.677278	0.382269	0.996385	0.268758	0.313576	1
FBgn0262722	0.931573	12.4781	331.54	0	0	0	0	0	1.31265	9.23783	1.48318	0.918079	1
FBgn0032804	0.0533263	0	0.167257	0	0.376305	0.247044	0	0	1.01439	5.34809	0.203765	1.0667	1
FBgn0035428	0.171332	0.0213295	0.0746362	0.303745	0.209929	0.496081	0.217865	0.0465911	0.525975	4.43512	0.0339108	0.48042	1
FBgn0036786	0.600148	0.841624	1.78823	0.287271	0.169401	1.58129	0.393705	0.270891	0.570811	1.93417	0.816962	0.936477	1
FBgn0032448	0.00695717	0.969301	2.14063	0.0589789	0.0278038	0.117802	0.155747	0.217486	0.905133	4.7105	0.152736	0.0432463	1
FBgn0035439	13.7342	2.44179	4.64429	0.460675	0.432471	1.00057	0.469511	0.370657	0.923622	0.941204	0.523121	0.613191	1
FBgn0052152	0.258923	0.952858	1.82425	0.127924	0.0880386	0.119838	0.0972689	0.0737726	0.667636	0.492936	0.137749	0.0154644	1
FBgn0039228	0.299287	1.79027	9.92118	0.325434	0.334167	0.714958	0.344176	0.383819	0.528307	10.1668	0.334089	0.969635	1
FBgn0031581	65.7227	91.8545	78.0788	0.251383	0	2.49794	0.341529	0	0.537951	0.657538	0.283481	0.247219	1
FBgn0030181	0	0	0.902059	0.38763	0.212535	0	0.0545237	0.477723	0.764978	1.79857	0.485622	0.534084	1
FBgn0030186	16.1784	0.858839	15.3846	0.341789	0.0509319	4.20879	0.397074	8.94983e-83	0.553017	0.891439	0.342958	0.194644	1
FBgn0035262	0.52895	1.30744	2.5991	0.194517	0.139327	0.213034	0.3155	0.390882	0.739881	1.62375	0.0627716	1.82212e-07	1
FBgn0021742	0.138382	0.0525556	0.0820778	0.387224	0.192585	0.702356	0.291772	0.382506	0.645265	5.66024	0.355703	0.518146	1
FBgn0263232	0.293523	0.147674	0.728995	0.308339	0.0925245	1.27521	0.38859	0.237929	0.621066	1.90596	0.995054	0.674565	1
FBgn0261925	0	0	0.502331	0	0	0	0	0	0.507763	7.14682	0	0.749735	1
FBgn0262438	0	0	0	0	0	0	0	0	41.0471	309.914	37.1881	0	1
FBgn0263453	0.0339397	0.255437	0.507405	0.042145	0.199024	0.120423	0.0969047	0.13041	0.688234	1.50953	0.198377	0.118889	1
FBgn0029661	0.353965	1.69623	6.50295	0.423231	1.33206e-21	1.40379e-21	1.66709e-24	0.120522	0.600315	1.03558	0.352368	0.225748	1
FBgn0263354	3.00042	1.68482	0.911317	0.221522	0.271641	2.06673	0.443124	0.339114	0.536522	3.58522	0.333424	0.794576	1
FBgn0029647	0	0	0.131384	0.222487	0	1.4868	0.447304	1.23739e-49	0.691034	2.6612	0.274267	1.43145e-14	1
FBgn0035100	0.0757311	1.37592	4.80044	0.196563	1.16346e-20	0.135416	0.15838	0.285796	2.17621	7.41074	0.381631	0.131491	1
FBgn0000360	0.0136491	0.0514989	0	0.116358	0.061383	0.0767094	0.146331	0.105097	0.685716	0.358486	0.0308851	0.0982926	1
FBgn0015550	0.674024	1.15651	2.7154	0.172071	0.13952	1.478	0.267267	0.129808	0.066482	0.53471	0.291892	0.224374	1
FBgn0005619	0	0.0170866	0.0175471	0	0.22858	1.99943e-32	0	0.0252954	0.0945867	0.901115	1.76385e-131	0.224449	1
FBgn0035290	0.569241	3.20587	8.97447	0.0934987	0.153806	0.825946	0.463756	0.0916376	0.471932	0.831637	0.318306	0.579933	1
FBgn0263087	1.32874	26.2166	35.591	0.101524	0.036525	0.271123	0.156937	0.248097	0.0943672	0.601702	0.294745	0.337949	1
FBgn0031970	0.378674	0.445022	2.59131	0.0466146	0.363039	0.356966	0.0775883	0.210069	0.421833	1.57521	0.329984	0.400618	1
FBgn0037974	1.41673	8.68249	15.7793	0.103816	0.0275487	1.01732	0.495134	0.469902	0.0412567	1.54852	0.2797	0.203058	1
FBgn0262967	0.189991	5.67258	14.3252	0	0.209558	0.100031	0.179804	0.104602	0.118799	0.508286	0.0670025	0.0716758	1
FBgn0036179	0.218374	0.232398	0.755299	0.110697	0.0196554	0.339148	0.125173	0.112294	0.141045	0.656732	0.0812917	0.201791	1
FBgn0040735	0.177028	2.33654	40.7179	0.188305	0	1.02514	0.154844	0.213082	0	1.75547	0.507331	0.552472	1
FBgn0262377	0	0	0	0	0	48.8018	0	0	0	169.896	0	0	1
FBgn0053998	0.0270662	0.0761829	4.82835e-13	6.27061e-05	0	0	0.000221649	0	1.53426e-05	4.32775	0	0.0775114	1
FBgn0034435	3.94959	13.505	46.3015	0.164905	0.168726	0.0665025	0.460264	0.147063	0.174677	0.673251	0.11133	0.098874	1
FBgn0030536	0.444104	3.59949	15.4956	0.0408798	0.100594	0.0659609	0.0532182	0.256352	0.385848	1.15831	0.223031	0.262443	1
FBgn0030495	0.269189	0.15159	3.21293	0	0.0292242	0	0.018112	0	0.131298	6.32255	0.0593422	0.0430816	1
FBgn0262528	0	0	0.191886	0	0	0	0	0	0	1.82001	0	0	1
FBgn0259713	0.0610494	0	0	0	0	0.0707057	0	0	0.0645169	1.21078	0	0.127016	1
FBgn0036154	0	0.0454973	0.0648707	0.0660006	0.0875701	0.0239541	0.0723632	0.174264	0.306003	0.615291	0.118546	0.150609	1
FBgn0050366	0.185418	2.83735	9.87504	1.55292e-26	0.00598575	4.35981e-15	0.0154739	6.5992e-23	0.0238376	0.502546	0.0171878	0.0450879	1
FBgn0023524	0.257747	0.427466	1.1896	0.120478	0.0312217	0.482655	0.217071	0.0801806	0.104782	0.650062	0.0712488	0.210895	1
FBgn0086053	0	0	0	0	0	0	0	0	0	202.218	0	0	1
FBgn0053926	7.96389	22.9429	53.6719	0.456142	0.086459	0.283802	0.160751	0.25808	0.194221	0.607484	0.0277072	0.127456	1
FBgn0029552	0.0456297	1.20451	8.20536	0	0	0.0528471	0	0	0.0482214	1.35744	0	0	1
FBgn0034996	0.378326	0.383192	1.23623	0.0974356	0.0310572	0.0636936	0.0873231	0.0943289	0.0767021	0.514217	0.132802	0.0944572	1
FBgn0053117	0	0	7.56088e-86	0	0.207438	1.14701e-305	0.193487	0.302495	0.114889	0.754799	0.604691	0.38994	1
FBgn0040524	0.611289	3.91009	5.08305	0.139629	0.1895	0.00858257	0.405743	0.238495	0.370291	1.31002	0.304006	0.193595	1
FBgn0046698	0.157605	0.404481	1.45552	0.279409	0.0741444	0.395491	0.183807	0.0632346	0.333114	0.520958	0.125464	0.273255	1
FBgn0038132	0.539591	0.186341	0.669028	0	0	3.82919	0.443116	0.0641869	0	0.793206	0	0.166422	1
FBgn0260971	0.242751	0.222414	0.495449	0.149175	0.127129	0.387778	0.127287	0.198805	0.365126	0.983376	0.137413	0.428605	1
FBgn0043577	0	0.0620954	2.1288e-306	0	2.67247e-64	0	0	0	1.62155e-204	228.019	0	0.476558	1
FBgn0036410	0.921489	26.0177	54.333	0.145986	0.442732	0.261134	0.308686	0.0471984	0.082879	2.6247	0.206022	0.326332	1
FBgn0039217	0.284613	0.0970474	0.343152	0.0411364	0.36613	1.67565	0.296096	0.0282595	0.358888	0.765785	0.158981	0.298197	1
FBgn0030810	0.406499	0.293721	0.769536	0.300528	0.0993699	0.769355	0.42468	0.267273	0.47166	0.98408	0.461618	0.65867	1
FBgn0035139	0.0996533	0.96568	7.01345	0.0144396	0.108749	0.585522	0.0239903	0.0226169	0.373217	2.92667	0.538713	0.133233	1
FBgn0032768	0.0520206	2.899	12.1102	0	0.0244727	0.020083	0	0	0	0.515856	0.0163887	0	1
FBgn0030317	0.289595	0.177891	0.0586637	0.257581	0.202935	0.255086	0.0830758	0.448715	0.347006	1.98017	0.293207	0.261144	1
FBgn0036259	1.11326e-17	0.0825023	2.2487e-235	2.84532e-127	2.85843e-305	0.017873	0.0213387	7.43491e-175	0.102896	1.03496	0.0184647	0.773415	1
FBgn0002561	0.411432	0.259684	0.474255	0.150641	0.129399	0.728322	0.252705	0.0555241	0.278501	0.547574	0.186231	0.173137	1
FBgn0042098	0	0	0.124366	0.0843547	0.251825	0.0688847	0	0.167044	0.0838071	0.589797	0	0.0206242	1
FBgn0259794	0.427085	3.91777	24.2887	0.0608304	0.0180858	0.317784	0.176893	0.0275835	0.341819	2.1842	0.367611	0.0265003	1
FBgn0037519	0.694834	0.545608	0.575293	0.0939136	0.0904341	0.175541	0.231081	0.0316618	0.0637288	0.808229	0.00507579	0.00552743	1
FBgn0038697	0.495844	5.34323	23.161	0.0135791	0.0488164	0.11849	0.0195117	0.00859359	0.251758	0.52325	0.175069	0.200144	1
FBgn0037411	0	0	0.000510756	0.121629	0.114778	0.0120293	0.111747	0.344081	0.212655	0.716024	0.36495	0.297374	1
FBgn0034507	2.29896	1.51195	2.08142	0	0	0.301943	0	0	0.0250468	0.705072	0.0226406	0	1
FBgn0041231	0	7.16857e-264	3.83181e-17	0	0	0	0	0.0108814	0.198085	0.549938	0.0578445	0.263846	1
FBgn0014849	0	0	0	0	0	0	0	0	0	0.918635	0	0	1
FBgn0014848	0	0	0	0	0	0	0	0	0	0.696677	0	0	1
FBgn0261930	4.28583	1.94951	2.06972	0.284789	0.350591	0.162284	0.107743	0.228891	0.3049	1.55377	0.360463	0.283614	1
FBgn0261932	0.401309	19.8274	168.617	0.116823	0.100398	1.99024	0.341805	0	0.225845	2.40278	0.0567534	0.370819	1
FBgn0039523	0.0484202	0.0346246	0.183544	0.0669708	0.225843	0.00845087	0.0330421	0.136409	0.339129	0.624335	0.10441	0.048915	1
FBgn0036504	0.0493532	0.282907	1.92319	0.0653288	0.100328	0.084689	0.0655767	0.141476	0.171941	0.546418	0.0207557	0.0159517	1
FBgn0261336	0.0773106	0.170067	0.72745	0.328942	0	0.268617	0.202867	0	0.0817017	0.766641	0	0.241273	1
FBgn0262825	1.25559	1.35433	1.90845	0.399003	0.138621	0.482674	0.275821	0.480723	0.0278029	0.913867	0.377515	0.579039	1
FBgn0030429	0.032987	1.37349	6.07755	0.0348187	0.082355	0.0213383	0.0114155	0.138563	0.127689	0.589269	0.0192016	0.21649	1
FBgn0085357	2.22861	5.55368	10.4747	0.314964	0	2.60744e-292	7.56723e-21	0	5.32165e-38	0.682258	2.67131e-231	0	1
FBgn0029696	0	0	0	0	0	0	0	0.0641868	0	0.528803	0.152824	0	1
FBgn0039739	0	0	0.341061	0	0	0	0	0	0	6.39195	0	0	1
FBgn0034846	0.0355896	0.77757	9.93378	0.0246912	0.100074	0.107816	0.0272626	0.0274136	0.0512159	1.00662	0.0709768	0.0311033	1
FBgn0034095	0.114354	0.443249	1.14886	0.411924	0.386524	0.329335	0.292992	0.284528	0.307849	0.569609	0.257489	0.328221	1
FBgn0000036	0.761155	0.927681	1.87323	0.0988794	0.147876	0.87891	0.333975	0.277388	0.140307	0.715503	0.143978	0.325815	1
FBgn0024995	14.3538	9.64331	9.67303	0.29585	0.293171	2.26767	0.445724	0.270403	0.213883	0.691758	0.445222	0.296026	1
FBgn0030897	0.25346	0.153347	0.63239	0.261036	0.401978	0.640631	0.380952	0.0256062	0.253237	0.502652	0.0117829	0.334064	1
FBgn0029810	4.10668	2.15351	5.10884	0.414767	0.0702531	5.36159	0.493454	0.319551	0.113978	1.39858	0.919332	0.483305	1
FBgn0261379	0.425332	0.349599	0.491315	0.112035	0.104323	0.803893	0.289172	0.0213122	0.0552611	0.59799	0.0700246	0.0315307	1
FBgn0033957	0	0.01072	0.0439625	0	0	0.0194981	0	0	0.0367327	1.37059	0	0.00988154	1
FBgn0034565	2.62564	0	0.470586	0.0797971	0.211751	3.73601	0.393704	0.27089	0.0792791	0.743909	0.144085	0.858435	1
FBgn0050044	0.070264	0.112538	0.475492	0.443837	0.189491	0.373429	0.290178	0.32456	0.108673	0.637911	0.4129	0.372944	1
FBgn0039089	0.299816	0.281893	0.904735	0.0264133	0.190375	0.61714	0.197646	0.103969	0.101586	0.514938	0.0732034	0.249658	1
FBgn0031701	0.0537344	0.457599	0	0	0.0758298	0.124452	0.141084	0	0	0.532833	0	0	1
FBgn0030618	0.59863	0.488583	1.32886	0.319539	0.170855	0.748753	0.297903	0.130493	0.0896642	0.514162	0.094559	0.0672383	1
FBgn0030619	0.590174	0.081816	0.465884	0.175387	0.174529	0.942882	0.0979155	0.136444	0.0652081	0.510952	0.0299338	0.0128554	1
FBgn0051053	0.568676	0.124736	0.292997	0.205209	0.312281	0.00908298	0.175715	0.219101	0.18993	4.21767	0.365648	0.0871645	1
FBgn0051088	0.0749421	2.16973	8.88669	0	0.338486	5.38554e-157	0.00298732	0.0266228	3.25271e-33	1.02803	0.289004	0.0896477	1
FBgn0037415	0.0284179	0	0	0	0	0	0.124284	0	0	0.845407	0.0814408	0.0886872	1
FBgn0037413	0.0219793	0.0308931	0.0530957	0.0233795	0.18612	0.152736	0.0491726	0.0692886	0.464555	1.74365	0.251955	0.54355	1
FBgn0052762	0	0.0352769	0.0335322	0.0341162	0	0.0371462	0	0	0.0677896	60.1077	0.183832	0.0667296	1
FBgn0085449	0.137684	0.276416	1.40211	0	2.67788e-280	0.203139	0.0170294	2.2251e-125	8.19688e-306	0.932457	0	0.0652097	1
FBgn0031275	0.209337	0.117189	0.553249	0.0384492	0	0.335332	0.12247	0.0100794	0.226983	0.567728	0.0767825	0.247202	1
FBgn0029856	0.472018	0.589985	1.10312	0.000226687	0.000178512	0.759305	0.225207	0.0961859	0.0814867	0.725534	0.0742977	0.0782893	1
FBgn0030058	0.509	3.99194	9.88345	0.0941609	0.0624667	0.205047	0.0193572	0.0532239	0	0.877815	0.0845627	0.0230217	1
FBgn0004588	0	1.29953	11.388	0.174358	0	0	0	0	0.113327	105.677	0.0830419	0.341035	1
FBgn0032368	0.105415	1.19741	2.75948	0.0959482	0.0503259	0.0766519	0	0.0320174	0.0996707	0.599367	0.107683	0.293948	1
FBgn0262447	29.1591	0	0	0	0	42.7308	0	0	0	29.2156	0	0	1
FBgn0031927	0.868516	0.394969	0.401628	0.266493	0.235723	1.06392	0.423667	0.351817	0.229461	0.745315	0.247306	0.243249	1
FBgn0031515	8.28163	15.9464	27.018	0.121999	6.65024e-51	0.0643907	1.55826e-21	8.12515e-34	0.00164752	0.562337	1.45045e-11	0.108329	1
FBgn0004118	0.251091	0.156772	1.26072	0.101394	0.172447	0.501284	0.160492	0.100007	0.105926	0.621159	0.197607	0.222475	1
FBgn0035512	0.567103	1.68679e-92	0.12763	0.0213315	0.00195154	0.379549	0.119599	0.00295981	0.263536	1.18243	0.122341	0.295217	1
FBgn0029719	0.415229	2.20798e-203	0.12042	3.72544e-12	0.197498	0.144677	0.279826	0.386565	0.0699716	0.527559	0.245235	3.70503e-214	1
FBgn0259200	0.0493025	1.0781	6.49213e-05	2.2036e-09	0.0729329	2.03511e-06	0.297142	0.00102737	2.29134e-06	4.74078	3.0092e-08	0.000699865	1
FBgn0030706	0.453045	0.637851	1.09264	0.24117	0.0813146	1.03035	0.376281	0.351424	0.255857	0.623584	0.470468	0.396367	1
FBgn0261842	0.100749	0.000876706	0.0360309	0.00492505	3.39427e-10	0.0208145	0.21357	0.309594	2.02741e-09	1.42879	9.63703e-07	0.00328463	1
FBgn0030770	0.591377	2.72376	9.62199	0.275209	0.417313	0.256844	0.226305	0.489375	0.156241	0.733039	0.070616	0.192248	1
FBgn0036323	0.419476	1.42484	5.15952	0.0393704	0.208948	0.300069	0.0755402	0	0.338995	0.856405	0.0353572	0.243854	1
FBgn0037212	0.633411	1.27053	0.5769	0.129485	0.086754	1.20068	0.160151	0.243192	0.139848	3.26566	0.192136	0.30625	1
FBgn0262036	0.216283	7.04353	11.9199	0.295793	0.26164	0.286278	0.18918	0.409093	0.0979577	0.612785	0.501768	0.192852	1
FBgn0033090	0.281294	0.33082	1.2346	0.285669	0.187983	0.287588	0.203942	0.233729	0.455967	0.507004	0.252249	0.205015	1
FBgn0054051	0.717535	0.33685	0.0790205	0.163183	0.110622	0.361314	0.0266643	0.187754	0.164845	0.928082	0.0487742	0.528727	1
FBgn0052283	0.332974	1.7091	0	0	0	0	0	0	0	1.10063	0.106027	0	1
FBgn0031005	0.202515	0.198009	0.771964	0.0527525	0.0945698	0.435106	0.0785181	0.044241	0.248913	0.681231	0.191603	0.354786	1
FBgn0028878	0.328698	0.635798	1.90701	0.0361694	0.0479898	0	0.0693983	0.0136428	0.0239564	0.561982	0.021655	0.0117909	1
FBgn0261056	0	2.21832e-23	0	0	0	3.49233	0	0	0	25.825	0	0	1
FBgn0261055	0.312237	0.747326	1.27009	0	0	0	0.293529	0	0.0886608	0.822382	0	0	1
FBgn0261630	0.0837084	0.644491	6.51999	0	0	0.145423	0.109828	0	0.132694	16.6017	0	0	1
FBgn0031613	1.76806	6.33043	7.36794	1.91606e-58	0.119306	4.42854e-46	3.66432e-49	0.251268	1.1168e-33	0.805977	2.49373e-37	0.314695	1
FBgn0263597	0	0	1.11285	0	0	2.46559	0	0	0	10.5553	0	0	1
FBgn0040355	0.440417	2.07666	4.27878	1.90388e-128	1.64057e-14	1.14653e-90	3.14747e-169	0.189576	0.0589191	1.0583	5.47688e-51	8.24452e-12	1
FBgn0053642	0	0.115432	0.0643774	0.0245319	0.177031	1.71562e-86	0.416275	0.0920996	0.0654522	1.12614	0.223021	0.310819	1
FBgn0035478	0	0.107288	0	0.103758	0	0.225947	0.0426604	0	0.103085	1.45093	0.0931819	0.253683	1
FBgn0040096	1.04721	0.419744	0.474293	0.127824	0.0225185	0.656018	0.191629	0.391427	0.17647	1.18941	0.0973709	0.806476	1
FBgn0262005	0.338019	1.46504	8.41611	0.0589011	0	0.514223	0.194178	0	0	0.550353	0	0.0577346	1
FBgn0030224	0.121611	0.944054	5.07279	0.276449	0.111642	2.4221e-21	0.000814168	0.251231	0.494208	1.82605	0.745516	0.156612	1
FBgn0085197	3.71655	93.8709	196.542	0	0.190737	0	0.0591057	0	0.0714118	0.670086	0	0	1
FBgn0031636	3.90046	3.3262	6.47456	0.175092	0.0725929	0.821422	0.375242	0.189732	0.404969	0.918231	0.273851	0.482965	1
FBgn0052204	0.362351	0.297739	1.1971	0.157813	0.121972	0.831968	0.478195	0.136878	0.33474	1.03063	0.147179	0.578138	1
FBgn0262973	0.29196	0.436698	0.919793	0.0527818	0.0414868	0.400467	0.0162291	0.135067	0.206423	0.608126	0.16842	0.0290544	1
FBgn0051686	0.189884	1.24113	0.918481	0.0618303	0.388897	1.06337	0.301741	0.0414592	0.364006	0.683124	0.0987112	0.0716629	1
FBgn0034487	0.105245	0.563866	0.482574	0.170679	0.213852	0.102989	0.245367	0.347613	0.184322	0.805957	0.25423	0.450812	1
FBgn0031432	47.5416	32.5095	4.41594	0.186854	0.035417	0.760417	0.41705	0.211439	0.0403785	0.995396	0.515407	0.0522109	1
FBgn0038837	0.716564	0.898508	2.66474	0.20575	0.109977	1.31789	0.147138	0.231359	0.13995	1.27545	0.0953227	0.525411	1
FBgn0262098	0	1.51874	11.2865	0.26705	0.177162	0.290767	0.219595	0.151094	0.397974	2.48957	0	0	1
FBgn0029955	0.189928	0.567574	1.50767	0.0571019	0.0151527	0.491225	0.0744104	0.0855818	0.0482506	0.638801	0.0353174	0.176763	1
FBgn0040097	0	0	0	0	0.216522	0	0	0.0369325	0	0.608537	0	0	1
FBgn0085263	0.644815	1.27661	1.04438	0.276034	0.0931134	0.493107	0.432142	0.404594	0.128476	0.507891	0.215461	0.0508532	1
FBgn0038846	9.63629	0.695115	0.149769	0.0285729	0.0842664	0.16627	0.235489	0.0291531	0.105541	22.6292	0.0231684	0.940596	1
FBgn0033110	4.45801e-20	2.78235e-26	0.0064978	0.0824946	0.00580992	9.03926e-11	0.000521246	0.00236601	0.00098953	2.06064	0.0963337	0.00125472	1
FBgn0261698	0.271935	0.239402	0.475795	0.143089	0.265105	0.374977	0.0930653	0.184285	0.285505	1.13294	0.15369	0.179182	1
FBgn0050121	9.49197e-73	0	6.44579e-24	2.21862e-05	0	0	3.06192e-05	0	0.000211167	0.614107	0.00229668	0.0213117	1
FBgn0053775	0.0510211	0	0	0.217085	0.0720076	0	0.312392	0.0614122	0	0.505945	0.146218	0.159228	1
FBgn0039673	0.0695389	0.108584	0.455933	0.45492	0.0910671	0.0755282	0.126384	0.364873	0.361921	0.718314	0.128055	0.176814	1
FBgn0085285	2.51987	1.63433	0.892435	0.100887	0.089238	0.292924	0.304184	0.0380536	0.200463	0.62701	0.33221	0.20777	1
FBgn0035138	0.403902	1.6714	14.4941	0.280776	0.308904	0	0	0.0541478	0.134067	1.04876	0.224756	0.348967	1
FBgn0053752	0.135207	0.0696477	0.0763911	0.0269508	0.0587061	0.0253154	0.149238	0.111934	0.104832	1.51426	0.405163	0.65491	1
FBgn0001983	0.619522	0.978922	2.00698	0.222756	0.0738886	1.51587	0.427403	0.168044	0.239753	0.778742	0.350087	0.0816937	1
FBgn0038492	0.0106322	1.59479	11.4233	0.0032009	0.00454672	0.813388	0.128091	0.0995974	0.00303433	1.99795	0.00571608	0.0498156	1
FBgn0031531	0.456957	7.18895	31.2495	9.85207e-234	0	0	0.17733	0.199855	0.163886	1.20719	0.0162809	1.12388e-51	1
FBgn0262878	0.0997608	1.98923	10.6037	0.104647	0	0.250679	0.104711	0.206711	0.322449	0.664809	0.223341	0.222371	1
FBgn0261388	0.542961	0.379283	0.958519	0.202238	0.0830547	0.85436	0.289046	0.0495091	0.288985	0.532094	0.243101	0.203128	1
FBgn0032549	0	1.6524	8.65078	0	0.0326197	0.0535371	0.0606491	0	0.0732765	0.687583	0	0.0480872	1
FBgn0043043	0.476009	0.192227	0.0927452	0.0203638	0.172619	0.231293	0.169729	0.14722	0.128699	0.522653	0.0144025	0.0152172	1
FBgn0000146	0.686918	1.09283	2.07655	0.0960722	0.193838	0.639757	0.207084	0.339523	0.221983	1.24545	0.164337	0.398563	1
FBgn0036656	1.07101e-102	0	0	0	0	0.347988	0.00323427	0	0	3.2465	0	0	1
FBgn0036655	4.95081e-167	0	0	0	0	0	0	0	0	0.982534	0	0	1
FBgn0053124	1.53853	0.27374	0.189237	0.0361	0.0980447	0.0524082	0.0593703	0.0272333	0.165026	0.560904	0.0216135	0.258903	1
FBgn0037797	0.0976716	0.190762	0.141801	0.108528	0.0870725	0.0470907	0	0	0.264699	1.75773	0.201426	0.553052	1
FBgn0008636	0.18047	0.334397	1.60559	0.013716	0.0304417	0.203159	0	0.0855845	0.0350811	0.768088	0.0951331	0.092246	1
FBgn0054043	3.68619	4.05441	2.74219	0	0	0	0.0155012	0	0	0.527216	0.0186292	0.110615	1
FBgn0038163	0.361723	3.18973	15.4451	0.196658	0.19286	0.223434	0.471076	0.348314	0.400162	0.717398	0.289406	0.342844	1
FBgn0040904	0.173572	3.50002	15.6667	0	0	0.0670087	0.354248	0.0696406	0.305717	0.573734	0.165809	0.180562	1
FBgn0004429	2.25263e-94	2.13859	2.77655e-10	0.105516	1.4447e-29	5.25666e-84	0.155737	4.20797e-35	0.0526509	0.538648	3.27398e-14	0.00447158	1
FBgn0050281	0.0453796	0.000226136	0.362959	0.0945402	0.000204922	0.142145	0.177088	0.0722555	0.205288	4.1197	1.55606e-17	2.95827e-84	1
FBgn0032668	5.21407	2.61716	2.31429	0.0421246	0.0227716	0.493632	0.224652	0.0789261	0.0687293	0.650233	0.250556	0.0630999	1
FBgn0260470	0.0150471	0.0495923	2.04825	0.00207845	2.88237e-06	1.29293	0.224235	0.0414175	0.259575	2.31524	3.56426	0.220906	1
FBgn0086408	0.0849633	0.108829	0.245507	0.0593055	0.118621	0.321719	0.221922	0.0879835	0.127175	0.743273	0.0624462	0.236863	1
FBgn0259949	0	0	0.250809	0	0	0	0	0	0	1.9033	0	0	1
FBgn0041246	0.0615216	0.278131	0.886958	0.115338	0.115528	0.254712	0.162938	0.289603	0.206259	0.543987	0.201398	0.278204	1
FBgn0033708	1.28151	8.40347	8.03455	0.111947	0.0406266	0.0968562	0.0653077	0.175301	0.116521	0.638145	0.0667871	0.0197908	1
FBgn0262786	0.0534874	4.29461	4.47366	0	0	0.185843	0	0	0	0.530401	0	0.0556416	1
FBgn0044050	1.76545	1.92822	6.55465	0.0568585	0.0463424	0.665446	0.0565753	0.165214	0.319549	2.2386	0.0658377	0.0226412	1
FBgn0262148	1.61412	5.60639	19.4335	0.0180731	0.239795	0.275495	0.118892	0.0613533	0.161602	1.01092	0.340848	0.530251	1
FBgn0085438	0.271628	0.344087	0.461322	0.311385	0.0906201	0.928262	0.33624	0.2773	0.431153	0.847574	0.30903	0.275347	1
FBgn0031756	0.00840126	0.978566	2.1552	0.321709	0.249002	0.26272	0.0880919	0.313474	0.193932	1.41628	0.353003	0.279667	1
FBgn0031751	0.876994	19.2116	60.5357	0	0.103145	0.677146	0.223736	0.0879672	0	1.08709	0.104721	0.34212	1
FBgn0262418	0	0	0	0	0	0	0	0	0	317.532	0	0	1
FBgn0003270	0.018597	0.0204547	0.0972152	0	0.104986	0	0	0.0223845	0.0393066	6.82335	0	0.019346	1
FBgn0037427	0.0232951	0.106454	0.135053	0.00601442	0.0420882	0.270862	0.109351	0.00435704	0.384526	1.4567	0.0580317	0.761635	1
FBgn0000028	0.640439	0.319889	1.77011	0.29668	0.334565	0.996172	0.462077	0.373492	0.238789	0.967344	0.482788	0.584132	1
FBgn0001319	0.327329	0.682212	1.40194	0.225837	0.0697594	0.638843	0.0974278	0.218292	0.0115503	0.506779	0.37631	0.12469	1
FBgn0033499	3.63772e-44	0.83065	3.60651	0	0.200318	0.0134139	0	0.0796034	0.0571536	0.649606	0.117381	0.285557	1
FBgn0033494	17.8675	13.3961	15.6068	0.319785	0.428591	0.38094	0.499057	0.232491	0.124458	0.595932	0.0189503	0.190949	1
FBgn0052571	324.606	105.696	16.1092	0.0488548	0.0321006	0.297624	0.0456109	0.244786	0.169129	0.890027	0.0779601	0.25394	1
FBgn0000039	0.453103	0.35526	1.54335	0.074101	0	0.317144	0.191861	0.139655	0.17079	1.24827	0.121066	0.185643	1
FBgn0029828	24.2854	32.7636	8.35813	0.0624616	0	0.611972	0.45421	0.0206145	0	0.582299	0.243838	0.142306	1
FBgn0038054	0.0547251	2.66253	9.34744	0.0357365	0.184286	0.0684614	0.0824777	0.382549	0.113035	0.507259	0.0936977	0.0952931	1
FBgn0038602	0.0857353	0	0	0.227992	0	0	0.112487	0	0	0.850183	0	0	1
FBgn0053971	0.312528	0.137052	0.0750891	0.0361724	0.0357862	0.221044	8.34858e-13	0.0754855	0.134695	0.529808	0.034912	2.29707e-11	1
FBgn0039075	0.831854	1.12214	1.97585	0.423902	0.370922	0.760971	0.358757	0.351197	0.493088	0.710782	0.286386	0.464845	1
FBgn0031715	1.47161	2.18952	3.16341	0.383301	0.47742	0.414883	0.415396	0.397125	0.104358	1.10665	0.766969	0.200608	1
FBgn0033344	0.280537	1.54287	0.13793	0.472192	0.407338	0.801624	0.245813	0.148552	0.143557	2.59159	0.309808	0.360242	1
FBgn0034906	0.217231	0.179198	0.283892	0.0577673	0	0.188693	0.190009	0.130736	0.0573923	0.538536	0.103758	0.0564949	1
FBgn0013433	0.171427	0.179817	0.136136	0.0941706	0.0616119	0.239447	0.0708386	0.00324241	0.0721933	0.598016	0.0735023	0.0107358	1
FBgn0029770	0	0.0718556	0	0.0694914	0	0	0	0	0.0690403	103.329	0.0312039	0.0339804	1
FBgn0262362	0	10.2964	33.6808	0	0.465788	0	0.189776	0.193464	0.200454	1.54156	0.187748	0.786563	1
FBgn0038621	0.631996	0.142004	0.0685329	0.038431	0.0945769	0.094995	0.105017	0.0779383	0.44412	0.527191	0.268946	0.0627652	1
FBgn0263250	0.114633	0.378281	1.71148	0.258637	0.215712	0.240807	0.281373	0.320117	0.236408	0.505217	0.403325	0.254011	1
FBgn0033767	0.359703	0.845892	2.55427	0.142173	0	0.46812	0.330605	0.253062	0	0.639837	0.199126	0.217592	1
FBgn0037464	2.94191	8.35104	16.3735	0.365609	0.224126	0.463845	0.208966	0.292188	0.293718	20.5291	0.422857	0.183666	1
FBgn0004590	0	0.133681	0.0847129	0	0.114355	0	0	0	0.299701	46.2007	0	0.08429	1
FBgn0004591	0	0.189018	0.0898349	0.0913996	0	0.199034	0	0	0.272419	98.8404	0.410414	0.357546	1
FBgn0004593	0	0	0.0800239	0	0	0.089539	0	0	0.326807	42.1653	0	0	1
FBgn0004594	0	0.265526	5.93952	0	0	0	0	0	0.170082	39.8986	0	0.251133	1
FBgn0032318	1.09738	2.085	3.86088	0	4.20068e-194	2.15341e-61	0.235941	1.90501000211e-315	0.143843	0.504598	0	2.65062e-203	1
FBgn0050486	0.167816	0.170613	0.467892	0.119003	0.197407	0.48589	0.284758	0.168326	0.118229	0.832245	0.398825	0.210866	1
FBgn0037841	0.849769	0.639252	0.0215142	0.192883	0.032914	0.0809528	0.110419	0.246982	0.0701883	1.09882	0.0498122	0.094941	1
FBgn0051058	0.127253	6.17661e-05	0.00189485	7.82502e-06	3.38065e-06	0.325621	0.0191327	0.0211054	0.150578	0.585242	0.0536773	0.144495	1
FBgn0041156	7.57035	6.03584	5.57404	0.467558	0.252739	1.65923	0.365207	0.235146	0.413593	1.21078	0.239892	0.110081	1
FBgn0038558	0	0.000659594	0.0335235	0	0	0.0260874	0	0	0.0730856	12.2472	0	3.79992e-05	1
FBgn0029995	0.243959	0.313973	0.278185	0.300719	0.185338	0.226741	0.129055	0.236787	0.382675	1.16895	0.308724	0.340182	1
FBgn0031866	0.551178	0.654873	1.54802	0.339247	0.0694426	0.882358	0.46815	0.390228	0.232649	0.595011	0.34286	0.399044	1
FBgn0053983	22.5712	19.7187	13.8888	0.343364	0.140178	0.51765	0	0.149439	0	1.23116	0.332083	0.100015	1
FBgn0263353	0.786355	0.626768	0.977875	0.321061	0.160092	1.41117	0.400323	0.26965	0.273377	0.513728	0.280563	0.281861	1
FBgn0053632	0.0519189	0	0.108562	0.0552262	0	0.300655	0.227063	0.0624927	0.219471	0.514847	0.0495968	0.216039	1
FBgn0051361	1.0736	3.55275	13.7303	0.287146	0.411906	0.355191	0.188627	0.292097	0.378335	0.931348	0.0159551	0.258214	1
FBgn0034478	0.53447	6.17252	21.3735	0	0	0	0	0	0.0706034	0.662501	0	0.0694994	1
FBgn0033887	0.202335	3.65349	9.04708	0.150657	0.171337	1.06796	0.283168	0.0905414	0.0641483	0.60193	0.193286	0.147339	1
FBgn0034218	0.0291565	0.167811	1.28834	4.53831e-14	0.114961	1.5649e-07	2.23262e-07	4.24136e-08	0.0570745	1.81592	0.0974576	0.431388	1
FBgn0040341	0.0151999	0.0129002	0.0501895	6.44401e-37	0.0960589	0.116535	0	0.114493	0.0700345	0.685105	4.50243e-35	2.80703e-22	1
FBgn0263376	0.0121014	0.0106137	0.0142456	0	0	0.0231265	0	0	0.00354906	1.09527	0	0.0101032	1
FBgn0053512	0.466334	0.408358	1.45874	0.157373	0.0536194	1.22347	0.258482	0.131862	0.0798774	0.823621	0.0915904	0.176291	1
FBgn0053517	0.79067	0.0108135	0.882628	0.035236	0.00959206	0.48584	0.206788	0.0215071	0.00145086	0.785881	0.277271	0.44468	1
FBgn0039592	0	0.278753	0.132483	0	0.153292	0	0	0	0.0382616	1.4361	0.034586	0	1
FBgn0085218	0.5131	0.000406359	2.04221	1.32907	0.000393974	0.795268	0.000253369	0.00951703	6.16923	0.00311411	4.9752	8.2585	2
FBgn0085216	1.33989	3.93072	7.78053	0.741894	0.53401	14.9739	1.00411	0.681588	7.10562	5.45567	0.982077	4.94482	2
FBgn0040752	4.36005	5.98916	17.5602	23.3962	28.4181	20.0436	21.3648	29.6152	37.6731	38.4499	34.1076	37.261	2
FBgn0262624	8.42941	3.65517	8.60809	10.5165	15.8311	19.3085	13.7308	25.7052	31.9907	28.32	23.6197	44.3008	2
FBgn0015558	2.90875	2.11779	5.57954	1.62259	0.00364686	2.83473	1.35742	7.2704	12.6122	12.3259	12.0274	14.3688	2
FBgn0025549	4.44153	7.89822	24.018	50.8404	41.7849	38.1517	55.7078	64.0426	63.4282	77.6361	71.2564	105.239	2
FBgn0032221	0.57432	1.01847	2.62828	1.24928	1.05047	1.65252	1.14826	5.24151	10.6046	12.3391	9.02671	25.0624	2
FBgn0034180	10.8621	15.6447	27.9957	19.0818	20.115	19.7956	21.0822	25.2926	25.2814	29.3641	22.5156	26.0642	2
FBgn0030514	9.41161	8.58149	16.2266	20.8624	21.6512	16.5895	20.7715	20.9811	26.032	27.2333	25.9864	24.8594	2
FBgn0033438	0.211936	4.45503	16.9153	14.7575	21.6631	53.519	65.9213	117.394	124.907	121.208	209.764	134.176	2
FBgn0000346	0.883348	1.63161	3.57606	3.35059	2.32941	4.215	2.66079	3.59235	4.50764	4.40567	5.05695	5.63331	2
FBgn0036585	0	0.558547	0	1.08034	3.58351	0.588143	0	6.72368	8.04995	10.0715	15.0384	14.2634	2
FBgn0032801	22.4459	3.88177	1.50047	2.16547	2.75257	3.35717	4.88013	3.30627	4.62017	3.65043	4.09366	6.44392	2
FBgn0028418	1.53922	2.57902	3.84955	0.635571	1.47358	5.3289	2.46188	1.33344	1.36857	1.90144	1.44881	2.42376	2
FBgn0259214	83.1408	60.648	76.8248	137.577	120.807	152.978	132.625	136.633	129.173	136.748	134.049	139.491	2
FBgn0041706	0.441584	1.03618	1.72056	3.33884	1.87911	2.3878	2.30216	5.50175	5.8524	5.4997	7.69487	7.7656	2
FBgn0041707	7.2575	4.56412	10.8538	3.09056	1.34156	10.2658	4.8926	2.83841	5.80807	9.24512	3.9623	8.86241	2
FBgn0052100	2.46782	4.37429	10.5366	5.5953	7.83153	6.05135	6.01099	6.87852	8.63987	10.2334	8.26923	8.95802	2
FBgn0003187	1.12683	2.11655	5.63409	1.18432	2.2118	2.05421	2.02829	12.7638	15.5802	16.5983	18.7855	26.566	2
FBgn0000578	7.57254	9.65841	22.9864	38.8208	55.1094	37.9749	40.0231	55.7507	70.0033	81.2403	64.3292	66.0253	2
FBgn0259738	0.903022	0.000465914	1.37159	0.759087	0.000228736	1.78842	0.000399046	0.00743024	2.49438	7.91251e-06	2.88897	5.26801	2
FBgn0259739	0.711902	4.52726	22.1407	0.737836	0.490731	0.438267	0.777965	0.76656	1.80901	1.69727	0.810614	3.39947	2
FBgn0051030	4.284	2.58387	8.10276	2.697	1.59047	7.88475	3.87649	5.73169	9.68571	7.8836	9.14404	12.2843	2
FBgn0038540	1.33393	1.90448	3.17732	1.48567	1.97759	2.34986	1.137	6.36086	8.45596	12.175	6.79807	17.48	2
FBgn0005636	2.37156	3.93684	5.78725	5.72436	5.03094	5.09838	3.64594	5.23361	8.52566	10.5422	6.03281	11.5815	2
FBgn0259927	1.35459	0.726064	1.92524	0.727457	0.0123535	1.92228	0.212713	0.359565	0.956468	2.04986	0.241977	1.60548	2
FBgn0259923	4.12734	2.50172	4.56667	0.808756	0.0696206	3.08779	0.525715	3.72389	7.16216	5.35712	6.11924	12.3535	2
FBgn0053333	0	156.708	482.694	1.34803	0.267237	0	0	1.02256	1.39149	1.40826	0.203622	3.12719	2
FBgn0035153	9.3636	3.73349	9.33836	2.75111	1.44644	4.22941	3.79808	2.81591	5.88278	5.37495	5.57208	6.57609	2
FBgn0261556	5.48893	6.01269	10.249	8.01313	7.10324	5.87823	6.36964	10.9593	14.3302	13.5624	11.48	11.9287	2
FBgn0085391	1.16099	1.11602	3.66286	0.553119	0.0686068	0.767859	0.279811	0.522902	1.6202	0.570071	0.58721	2.9665	2
FBgn0031627	0.988747	0.727325	1.90168	2.32173	3.23123	2.95152	2.36248	11.1496	15.7779	17.1404	18.5502	26.4361	2
FBgn0040388	1.93526	3.58821	8.11702	27.4002	31.0187	22.8193	34.104	39.2078	37.8155	44.1572	41.071	43.762	2
FBgn0026592	0.704152	0.835665	1.79492	0.553165	0.363969	1.41335	0.650145	0.921607	2.93677	3.28772	1.35537	4.91049	2
FBgn0030396	27.7175	28.2237	28.2479	5.39984	11.3615	6.94472	6.72302	24.6239	23.1702	20.0557	37.3646	34.9885	2
FBgn0030391	3.7502	4.93453	9.50977	16.1997	14.2108	14.7139	15.9275	14.8617	16.5824	16.9687	15.6396	16.8289	2
FBgn0000320	1.67409	2.83703	6.85035	13.38	11.6184	72.3658	87.8311	93.9734	99.2795	80.1159	190.998	121.318	2
FBgn0020620	11.4875	9.41133	18.6723	22.5322	19.6937	23.7773	25.9883	25.3275	26.5847	28.7729	28.3845	24.8004	2
FBgn0032821	5.14479	6.53569	13.09	16.9685	15.7511	15.1455	17.6603	22.6186	22.4066	21.9438	23.4209	21.8742	2
FBgn0013725	0.774157	2.07657	3.45246	5.21723	9.53985	4.32728	4.33021	28.1843	24.7141	25.2427	43.0344	39.687	2
FBgn0032533	0.265831	0.998972	5.67533	0.662689	0.874899	0.0908445	0.752939	0.635674	1.39204	1.58165	1.27814	1.67186	2
FBgn0029746	1.03088	0.884632	2.49473	1.34516	1.21977	1.82585	0.983358	1.25665	2.34318	1.97734	1.56932	2.14306	2
FBgn0010504	20.9726	19.1584	36.912	14.5577	18.4976	12.9656	15.7375	17.1281	19.5315	24.984	19.55	20.5231	2
FBgn0052590	5.20716	5.66367	11.3115	37.9413	36.4283	29.3833	37.7275	41.8192	39.9573	38.1534	48.238	50.1499	2
FBgn0026438	0.906538	1.40734	2.94504	0.693911	0.203456	1.47378	0.863233	0.995609	1.15998	2.41433	1.02844	2.0986	2
FBgn0021800	3.57615	4.0235	9.1775	7.22498	8.79058	6.62548	6.62755	9.33496	11.202	13.4492	7.59803	17.4864	2
FBgn0023520	2.64558	1.71819	3.68791	9.56797	8.99663	6.70196	10.0275	9.86652	10.8727	11.3267	9.38694	11.2007	2
FBgn0023526	9.781	16.0849	37.3115	31.057	31.8932	25.6684	23.8361	43.5087	58.3698	52.1187	50.6835	58.7722	2
FBgn0261570	6.85668	6.86631	14.5992	15.4998	14.026	12.4858	12.6995	18.3394	21.9249	28.4544	23.487	18.51	2
FBgn0033159	4.53071	5.58153	11.8873	9.742	7.34236	7.93349	6.29902	10.74	13.7847	15.8615	11.4949	13.3973	2
FBgn0035833	4.96268	3.33343	5.04055	2.21787	1.43411	2.81745	2.56113	2.47604	2.78274	3.28363	3.50271	2.50448	2
FBgn0043530	0.159094	0.11871	0.107486	0.735609	0.109513	0	0.114933	1.9552	0.615011	2.03337	0.191732	1.1956	2
FBgn0260486	2.25126	2.7311	4.94473	6.39714	7.06733	7.71027	7.10624	8.52841	10.3663	10.7343	10.247	10.0959	2
FBgn0019968	8.99167	9.77678	20.8148	17.7611	17.0577	14.4629	16.0837	21.5646	25.377	25.9643	24.3069	21.9313	2
FBgn0038749	0.214166	0.366425	0.447817	1.13904	0.537348	1.48824	1.29048	5.69987	9.95851	8.96693	14.503	15.9914	2
FBgn0262886	11.888	16.4488	23.3848	58.791	59.1144	43.0196	70.2346	80.3612	71.6321	69.5298	77.9795	116.781	2
FBgn0262081	9.54762	8.72602	18.5778	25.5638	23.6245	24.9361	22.2261	24.5423	38.3863	34.8212	30.3497	41.2986	2
FBgn0034051	36.2053	33.4095	70.7608	84.2858	83.6166	85.3551	86.1454	99.5738	116.485	102.649	123.618	109.126	2
FBgn0050421	5.87056	5.15598	5.63221	8.79857	7.84804	8.53976	8.39027	8.51731	9.7625	10.1191	9.78343	9.41483	2
FBgn0050420	6.24199	5.79955	13.3603	20.6879	11.2858	14.9637	16.331	17.8727	20.7805	20.8896	18.5444	20.1722	2
FBgn0033392	2.28515	1.21197	2.35151	2.52512	2.57799	2.77507	3.11138	3.24312	3.83733	3.52006	3.2497	2.97725	2
FBgn0033132	3.02466	10.5316	25.7113	3.59671	5.62629	8.1077	5.72644	7.63135	10.6208	13.4842	8.54261	15.5497	2
FBgn0033137	0.80171	159.013	276.442	1.38222	0.0064893	0.587199	1.00339	2.56383	1.23135	5.44804	2.11188	2.77731	2
FBgn0250785	18.4103	18.2219	37.9259	89.0859	91.8038	82.0615	90.9384	102.428	132.44	134.956	126.568	112.894	2
FBgn0262509	27.8293	15.0805	5.64852	9.00003	3.66606	22.1271	12.6701	18.079	19.1435	17.8941	19.4881	27.4868	2
FBgn0039277	0.4644	0.471498	1.32268	1.10196	0.621246	1.17501	0.864019	0.759514	1.14966	1.20443	0.51383	1.70201	2
FBgn0032516	9.89832	14.2945	39.8089	54.2518	42.8206	40.077	56.2562	54.103	60.2943	54.9961	66.9589	78.0187	2
FBgn0037930	155.021	148.672	87.2937	147.206	169.82	145.918	204.031	262.105	176.13	228.013	250.53	348.575	2
FBgn0039640	2.82417	2.80565	3.03933	2.85412	3.62444	2.19869	2.41476	31.8829	38.8791	26.9567	58.9425	56.8741	2
FBgn0031097	504.928	173.371	73.7568	112.733	185.124	158.024	72.7617	166.897	255.354	288.739	178.025	356.328	2
FBgn0034602	4.24453	3.49569	6.95223	0.829862	0.303257	1.77042	1.58118	1.68902	2.1063	2.52162	2.23264	2.81287	2
FBgn0034356	25.5924	39.5151	65.2653	1.48655	0.868127	1.61071	2.3294	1.61781	1.85607	2.34015	2.37652	3.83547	2
FBgn0037556	3.5993	5.94714	17.3931	25.5383	28.9401	20.2795	21.4782	28.7417	32.4405	32.9539	31.4581	40.5209	2
FBgn0037551	47.0735	50.4827	97.2675	97.1851	85.591	79.9695	110.888	91.9186	106.34	110.35	101.968	109.116	2
FBgn0010014	2.32952	3.10336	5.76334	1.46847	1.04672	7.16168	1.9026	3.46894	6.5632	6.00474	4.97169	11.1377	2
FBgn0023179	2.34217	1.78434	3.77538	1.27361	0.36585	4.15153	2.26491	2.17301	3.43223	3.66327	2.46492	5.35507	2
FBgn0085279	140.57	178.293	120.42	180.546	88.748	245.278	439.111	346.37	166.971	392.983	192.865	501.656	2
FBgn0085273	0.128292	0.493876	0.804771	0.887021	8.4194	0	0	10.1145	16.744	85.2369	11.3363	43.9747	2
FBgn0042132	9.56755	5.99132	9.13631	16.7511	12.4163	11.3224	17.9764	19.3402	21.6568	20.7596	16.5572	24.2874	2
FBgn0033429	13.7172	22.4382	15.9585	30.919	34.0267	24.6187	39.9018	49.2412	30.0108	45.2832	31.5874	112.95	2
FBgn0052423	39.872	44.4664	96.9422	44.0973	47.2858	44.3329	43.313	51.0214	66.9352	79.8734	53.8143	88.6128	2
FBgn0036986	0.991342	0.895759	3.27031	0.675958	0.286997	1.88785	0.626542	0.581323	3.22353	4.78923	1.55406	6.14794	2
FBgn0028953	26.2298	24.5552	57.977	60.0397	84.08	48.6335	57.4578	90.026	93.7647	119.453	107.845	105.191	2
FBgn0033802	3.37544	3.92951	10.3956	13.8448	13.6503	14.871	12.0008	27.0833	36.0227	20.0057	41.8461	40.2572	2
FBgn0014010	111.127	78.7169	233.767	127.225	110.941	129.631	118.819	105.781	153.842	145.48	144.796	134.204	2
FBgn0027280	14.2635	25.2563	34.1036	33.5135	30.9638	29.0011	30.841	38.8462	32.1898	42.276	38.3514	39.6804	2
FBgn0038320	12.4099	10.4727	20.4039	30.6408	29.6458	26.8103	29.579	32.8973	40.0546	40.2611	38.3022	35.6386	2
FBgn0002774	6.82115	7.46259	18.6505	34.1062	27.8578	24.2733	34.5518	34.2647	35.9667	33.362	35.0861	40.4614	2
FBgn0015721	0.569604	0.872125	2.0506	0.633656	0.946707	1.22261	0.713265	2.15384	1.71268	1.91057	3.42366	2.8446	2
FBgn0025625	0.69068	0.00294045	3.05843	0.660821	0.436613	0.015941	0.00306173	1.41162	3.69097	0.0336684	2.14945	4.53134	2
FBgn0029708	1.61088	2.27081	6.0522	1.88972	1.28727	4.49745	3.1624	8.7708	11.3216	14.067	12.0864	19.9362	2
FBgn0020224	13.0491	12.6272	30.3164	35.3104	32.8201	27.0237	29.8317	37.1441	46.3148	41.1713	47.6489	42.6419	2
FBgn0026239	3.91332	5.02288	13.771	19.4456	20.5451	15.9465	14.1131	31.1137	42.9357	36.372	44.3702	43.5436	2
FBgn0051632	3.57279	1.66851	2.67217	0.707891	0.338164	0.570246	0.542007	0.513454	1.32625	1.42904	0.561944	1.46604	2
FBgn0005561	0.10055	0.0880988	0.383225	0.613747	1.46557	0.847518	0.867244	1.73375	6.32732	7.29413	2.58611	12.5551	2
FBgn0001229	5.02886	10.3047	41.8211	20.3466	46.4732	13.0315	11.2678	62.5482	115.73	203.799	92.0867	215.968	2
FBgn0005694	14.213	8.80669	12.1353	19.1738	18.0577	18.0346	18.4016	18.3719	23.221	27.3256	23.8269	23.9847	2
FBgn0035211	6.16291	7.84503	13.9282	16.5636	16.0602	10.2838	14.0711	21.3772	17.9404	19.8113	19.7353	23.3845	2
FBgn0015229	4.53883	12.4614	30.8917	33.7624	77.6722	30.641	39.3508	88.8298	90.5937	101.27	125.815	154.457	2
FBgn0000615	9.03142	22.1276	64.2029	1.25097	0.981186	1.31394	1.42251	1.50093	2.30562	1.4489	2.1135	2.12534	2
FBgn0261397	5.9497	8.43404	14.7239	9.78623	11.5893	6.94617	8.7538	14.7429	17.5809	20.9049	17.1532	18.9826	2
FBgn0034656	2.47013	1.70162	2.23817	0.939016	1.0224	1.47433	0.796318	0.875116	1.32828	2.00287	0.925565	1.91574	2
FBgn0000635	27.0231	21.0708	35.4536	75.3539	111.496	52.9977	62.2336	143.786	190.328	219.175	188.664	223.858	2
FBgn0263391	99.94	56.8203	60.0578	167.102	145.499	143.177	206.444	242.318	190.458	228.847	208.746	293.954	2
FBgn0034301	0.815899	2.27859	26.7828	1.00418	1.01651	12.764	4.50718	3.26692	3.20296	7.98731	6.04715	4.32583	2
FBgn0038303	4.34982	5.05591	9.90721	8.80929	9.54135	7.53456	9.12597	11.1697	10.3351	12.983	10.9119	10.6317	2
FBgn0004575	1.14819	1.11707	2.12422	0.514743	0.144762	2.37946	0.379259	0.807126	1.4717	2.1838	0.795674	2.55138	2
FBgn0026197	1.95316	15.5944	124.26	25.5123	37.8712	13.5152	7.90873	42.8271	139.467	212.463	52.4285	322.738	2
FBgn0032088	180.964	96.2528	31.0014	2.83584	0.0845746	4.39884	0.832663	3.22153	3.0517	3.02714	0.865792	2.18874	2
FBgn0032225	0.531036	0.815367	1.72578	1.40295	1.13758	1.55479	1.43662	3.02733	3.77317	7.52279	3.53607	5.88657	2
FBgn0003366	2.91561	2.78211	9.39486	3.60101	2.03249	2.39352	2.52632	13.4266	23.8083	26.0088	21.7086	37.2741	2
FBgn0035021	4.07052	3.68338	7.55076	14.0357	13.4382	11.8013	14.0321	13.0916	15.3788	16.9053	16.7279	15.7992	2
FBgn0038547	0.925655	1.01341	3.34852	1.69128	1.37607	2.0436	1.47663	2.56362	4.16262	4.36852	3.35659	4.91285	2
FBgn0261259	10.3711	9.24955	13.7768	7.59118	8.85355	9.29959	9.60062	14.8187	17.4714	19.7702	20.1315	22.4336	2
FBgn0029986	0.507507	1.37022	2.8344	0.706002	0.644376	0.663848	0.795029	0.537874	0.790558	0.770674	0.798131	1.14209	2
FBgn0034315	26.4165	25.8227	56.1502	61.1407	66.281	52.7028	61.7387	66.8854	67.5363	79.1873	75.6241	72.6979	2
FBgn0026320	2.87782	11.0912	30.2078	148.38	231.573	136.84	142.251	225.654	301.135	298.389	307.769	366.839	2
FBgn0263117	0.00832625	0.427469	4.22139	2.8993	4.77756	0.263141	0.444615	38.5535	77.3213	75.8244	61.9651	131.385	2
FBgn0027583	12.7359	8.93548	12.4206	15.2117	14.2737	11.826	14.0604	14.9229	18.2754	18.1549	17.037	16.5302	2
FBgn0053978	17.4206	14.5923	17.6123	36.4111	43.592	37.5363	29.4997	42.467	61.6033	45.8137	41.0942	61.0549	2
FBgn0032943	4.71462	6.45495	12.0917	29.6283	43.0422	24.9317	28.6375	44.3048	40.3868	46.3461	45.9524	58.3601	2
FBgn0032940	27.4778	27.0921	20.8661	18.6599	21.1248	19.5593	22.0967	24.0607	22.7366	23.0077	22.0787	21.7725	2
FBgn0032946	7.5371	6.22143	10.9724	4.3398	0.149762	21.9529	9.51197	10.083	10.7883	19.4736	11.0016	30.4886	2
FBgn0086032	2.44802	19.4474	65.5551	323.982	189.212	71.0307	244.969	298.282	290.614	531.225	270.083	486.376	2
FBgn0020440	7.39792	7.8223	11.8554	13.3109	14.975	12.7187	13.5778	16.7338	15.7631	16.8828	17.972	16.9265	2
FBgn0004635	6.43072	9.40564	26.0151	12.5069	11.5109	5.97575	5.4399	22.2225	26.3044	25.3301	24.1699	39.506	2
FBgn0065070	29.4017	89.1208	35.7001	3.6181	14.6693	40.8267	0	63.4764	60.8097	146.516	7.27927	162.674	2
FBgn0035235	4.00892	8.42283	6.30131	13.1587	15.2358	10.8971	13.7391	16.5567	15.0285	14.1662	16.6456	17.8681	2
FBgn0035237	10.0237	7.35758	13.8284	20.1713	19.4023	16.5932	19.3309	28.1502	28.3855	27.1223	33.0138	26.0097	2
FBgn0035236	36.3946	38.2174	76.7472	60.5068	57.6567	55.2087	62.2047	65.0806	61.7582	72.2927	73.5787	74.9603	2
FBgn0263029	4.66625	7.77403	16.2857	3.94161	3.6802	13.1929	2.1608	4.21244	8.91983	13.6095	4.98198	12.6352	2
FBgn0262739	20.6822	20.7505	54.675	65.2643	72.505	45.5742	58.1879	84.7367	104.197	110.034	82.9581	91.2445	2
FBgn0039149	16.835	19.0823	23.933	57.1351	59.1079	35.0717	43.5783	66.073	65.574	58.4535	51.4077	90.5206	2
FBgn0039492	10.5657	12.0963	34.5623	12.3173	13.0974	14.7819	12.69	15.7325	17.6421	19.86	17.608	14.5775	2
FBgn0034789	1.80993	1.33869	3.31456	1.63064	1.34631	3.04531	1.75856	2.0827	4.03801	5.2662	3.56368	6.76868	2
FBgn0037780	7.48157	11.8629	20.8394	20.929	23.8179	18.2601	19.6039	23.9024	22.2938	23.973	26.9832	28.2185	2
FBgn0033153	13.2748	18.6734	87.5164	24.317	23.6899	44.7101	24.3981	19.7089	41.6807	43.2448	26.5151	31.2996	2
FBgn0010315	8.68705	7.74073	13.4545	33.2492	32.9663	27.2962	31.5781	38.7864	43.2086	36.8785	49.2407	42.6052	2
FBgn0010235	28.1658	31.8715	40.9335	54.8324	63.3627	54.6604	55.6708	62.9045	61.8138	75.845	63.6523	76.4146	2
FBgn0032202	18.7963	41.5136	160.186	90.6475	68.2092	70.9007	62.2095	84.1145	84.4322	66.1342	80.9632	107.422	2
FBgn0002567	11.8692	17.964	52.9813	0.79959	3.54524	2.68664	0.0393479	7.17349	15.3232	16.7708	12.8688	18.0728	2
FBgn0259822	5.03563	2.10992	2.71111	1.40978	0.724799	5.6124	3.11911	2.64361	5.7398	5.20042	3.37097	9.75771	2
FBgn0020269	5.61097	3.16322	6.17565	1.7639	0.71591	6.4744	3.41378	2.38169	6.821	8.78594	4.09306	11.2101	2
FBgn0051038	10.6689	10.2771	17.4358	14.9907	13.8575	15.2564	13.3785	24.4251	37.1073	43.2783	30.5228	49.9207	2
FBgn0051676	9.65112	9.69638	18.32	7.90682	5.96173	15.2059	9.20596	45.5021	111.167	108.7	76.6421	171.093	2
FBgn0037313	111.948	90.8746	145.23	181.749	175.687	151.603	183.865	183.064	195.576	238.911	170.9	254.832	2
FBgn0004435	15.9285	17.1176	29.2317	36.4702	35.1122	37.749	34.1636	39.6885	48.6724	39.8101	38.9017	45.4071	2
FBgn0004381	3.03007	2.97135	5.47907	3.81656	3.24669	5.79174	3.85799	4.41026	4.91317	5.82873	4.76764	5.97276	2
FBgn0035229	4.02617	5.82487	11.5218	5.64987	4.99644	5.45488	5.59512	6.45354	8.34635	8.989	7.67382	7.57733	2
FBgn0035253	12.8931	12.8968	24.4458	47.3891	43.8163	33.0051	40.8268	62.0751	66.6132	56.0792	63.3481	68.4518	2
FBgn0250876	3.64512	4.37865	7.52784	23.7771	26.6299	27.4921	31.1324	36.4443	41.7084	39.4394	43.5525	45.026	2
FBgn0260400	6.89193	7.32399	18.8715	16.8378	15.8285	18.2503	14.6527	45.0076	59.5693	55.7671	52.4083	81.4295	2
FBgn0260660	7.05811	4.95259	11.4994	14.8136	11.0343	10.5953	4.32286	11.559	34.9882	40.8343	14.658	49.6517	2
FBgn0039167	0.552172	0.503578	0.589062	1.67645	1.31189	3.33364	2.46874	1.97297	3.24024	5.60563	3.05401	3.92607	2
FBgn0000382	8.75149	9.08189	18.2645	22.819	20.9344	15.8982	16.9786	21.8356	27.0681	24.3416	23.0895	27.1179	2
FBgn0037412	0	0.163015	0.0109774	0.51595	0.456719	0.0540684	0.600221	6.34112	5.36437	4.34754	6.61964	12.1521	2
FBgn0052227	0.333969	0.848447	2.49009	0.832061	0.873953	0.811151	0.433357	8.57527	14.8756	18.5846	13.3788	22.128	2
FBgn0005586	3.02202	2.47128	4.75144	1.66209	0.62764	6.99276	2.8319	2.56735	3.43544	4.72246	3.35856	6.63919	2
FBgn0086779	8.56658	12.8342	23.694	33.6449	32.4089	26.3949	32.009	37.3619	38.3031	37.5127	34.8627	37.2102	2
FBgn0031100	0.0348091	0.0486526	0.316372	0.589504	0.707594	0.0758871	0.0606969	0.888147	2.39014	3.42494	0.840963	3.11376	2
FBgn0051658	1.42378	1.49791	4.10969	9.15732	7.42124	7.24116	7.83531	8.27068	12.4624	13.1979	10.4234	10.2479	2
FBgn0037336	6.8323	8.14343	16.707	28.6031	24.4366	24.2623	24.7742	28.644	33.2007	31.8313	32.6415	31.558	2
FBgn0037238	0.469288	0.758418	0.822775	0.538526	0.0165252	0.827706	0.816155	0.801683	4.1998	7.46361	1.3092	8.74836	2
FBgn0243486	0.44093	1.17686	4.90445	6.77053	17.9321	10.774	14.2118	36.0493	56.2148	78.9357	48.6733	103.26	2
FBgn0002734	0.414775	4.20191	7.8056	35.737	71.3861	18.482	28.1455	135.822	115.835	117.114	173.651	207.701	2
FBgn0002735	2.72183	4.47684	9.63344	49.0593	47.6473	48.0371	68.8012	191.76	188.841	177.544	311.009	325.226	2
FBgn0003285	1.82714	2.57349	7.27849	16.4796	22.1524	13.472	15.1892	57.3566	64.743	54.923	89.9337	94.0642	2
FBgn0031597	3.03065	4.54255	9.12567	10.2461	10.49	9.00614	10.7524	24.9542	21.6401	31.4033	22.9607	25.0433	2
FBgn0030351	43.4686	15.3434	49.1593	71.3351	46.6808	73.9206	61.0391	40.1325	86.3423	73.4358	57.8119	77.7706	2
FBgn0030421	0.479133	1.64054	3.19949	0.771311	0.322814	2.10315	0.182453	2.57485	6.62801	4.65666	4.32644	7.79443	2
FBgn0036813	37.1665	46.4272	60.0362	44.6063	51.6601	32.7276	43.5401	61.8832	50.5618	68.9474	50.7037	64.6856	2
FBgn0036814	5.69208	7.74092	21.3763	15.1575	17.3478	11.9382	15.5156	20.1059	20.9585	32.4529	25.112	21.5901	2
FBgn0010350	25.8755	26.2416	31.4745	15.8733	14.654	17.0729	12.6031	13.4921	17.4481	18.4842	15.7828	17.7006	2
FBgn0085423	9.20323	6.85677	13.2597	8.55987	8.49186	8.24881	8.04806	9.31705	12.479	12.897	9.95114	9.84689	2
FBgn0004880	1.6539	2.00574	5.47917	3.25224	4.31702	3.37532	2.31974	38.8798	49.0008	44.6113	66.9928	85.7634	2
FBgn0032451	29.9744	28.5358	68.8941	45.9932	41.1701	38.7773	48.956	60.433	79.3924	93.9123	73.7781	90.3707	2
FBgn0032249	0.640752	0.67196	2.08079	1.22146	0.882652	1.39182	0.85104	1.42781	1.79098	2.94329	1.90637	3.54437	2
FBgn0039294	0.00800669	0.0236574	0.5179	0.96823	3.38477	0.562051	1.50867	2.99271	4.28243	3.28934	3.50564	5.89404	2
FBgn0035593	26.5822	19.3927	40.3891	49.6943	48.5895	45.7759	58.279	49.3603	49.4907	54.8362	54.2322	61.0141	2
FBgn0086704	0.417005	0.633906	1.22751	2.83613	1.12854	1.45116	2.26984	2.2258	3.20751	3.32856	3.06279	4.35546	2
FBgn0029123	4.38925	4.01717	11.8888	1.81267	3.38659	4.19269	1.87328	3.61451	12.0174	20.324	6.55999	17.5454	2
FBgn0031745	0.889666	1.50554	4.33773	1.72093	2.87861	4.43971	4.42723	12.0126	15.4946	13.6468	22.3089	21.23	2
FBgn0052039	10.6582	22.6064	25.185	17.3981	25.0273	16.0267	16.8652	30.3423	24.1401	34.3054	33.4253	59.7771	2
FBgn0010905	6.44218	8.59162	18.9731	5.92757	9.49828	8.02452	5.89284	11.4787	19.1425	24.743	15.9476	23.8851	2
FBgn0051108	3.97609	5.38249	14.5868	11.8673	10.6999	10.8525	11.4753	12.2065	12.8936	13.7236	12.6985	12.8961	2
FBgn0040281	0.996013	1.12502	4.52558	1.37381	1.01194	3.29265	1.81581	14.3878	15.854	17.134	22.8888	30.3531	2
FBgn0034959	4.67094	4.46081	7.48268	13.4497	12.706	11.4303	11.2024	14.4939	16.693	16.9337	15.4132	15.387	2
FBgn0036008	6.25912	12.0374	18.8176	37.3399	48.8128	25.4582	34.6871	68.6309	52.214	56.9563	72.3803	86.0618	2
FBgn0034172	8.57056	10.6723	19.0651	18.4102	15.6027	15.3116	14.429	18.5107	17.6625	20.3955	17.3329	19.2517	2
FBgn0003510	2.72782e-198	0.36887	0.687273	1.80214	2.81334	1.50156	2.39497	2.82296	2.53434	3.03439	2.55263	3.18129	2
FBgn0052486	10.7189	8.34678	27.8688	20.0476	19.3949	15.0257	13.7439	18.2241	36.3265	19.277	32.7323	37.0089	2
FBgn0260441	3034.21	1723.84	1964.59	3787.76	3667.77	3434.67	5683.04	5504.75	4274.37	5235.97	4263.77	5669.58	2
FBgn0003267	0.967545	4.13592	2.11862	1.49147	4.26462	3.56985	8.09053	17.8754	18.2529	14.2511	34.5765	25.8602	2
FBgn0039129	3.88679	4.40657	24.2489	1.58288	1.93862	4.77264	2.8702	0.964463	4.55651	2.64858	2.40566	2.89756	2
FBgn0263445	0.968649	0.970981	2.47031	1.56113	0.93402	1.06553	0.801178	4.443	14.4351	8.1638	13.1231	20.7468	2
FBgn0034093	14.6291	9.88055	11.9173	8.84038	9.06884	6.69599	8.29188	9.07195	13.8753	9.04734	14.4495	16.4706	2
FBgn0034725	0.98512	1.39657	3.31354	10.5137	18.9037	14.7391	16.9663	15.8441	20.3367	24.556	20.256	24.0218	2
FBgn0038385	1.82255	2.80708	5.36858	13.2584	18.5426	10.5166	11.448	19.6797	22.4192	27.228	21.4778	22.8345	2
FBgn0260943	2.25778	2.28873	10.4578	10.6484	3.35878	9.43335	10.101	13.3808	33.5157	54.4278	10.6486	54.1606	2
FBgn0085403	8.23593	6.93662	20.4979	18.7531	22.6767	16.8221	15.4962	34.2604	48.5676	52.2283	45.7609	50.6347	2
FBgn0037015	1.50019	0.782639	3.88987	1.25596	0.377606	1.59199	0.470376	1.09499	1.46275	6.39203	0.637201	5.49715	2
FBgn0028509	3.93787	7.34147	15.8426	5.55653	7.647	6.88013	6.13743	7.97266	15.2959	11.5808	11.5026	15.9007	2
FBgn0035719	1.07265	0.812803	3.23034	0.814371	0.609423	1.41905	0.701794	1.19237	3.63422	2.09766	2.25048	3.89664	2
FBgn0039329	1.51883	1.93336	2.64789	4.2346	4.83032	3.44147	3.7384	5.18186	6.30366	5.02239	6.15292	6.55469	2
FBgn0039328	3.12346	4.39245	8.74384	10.3593	13.9688	7.25718	8.1401	11.518	22.7112	22.5397	14.1167	30.0102	2
FBgn0034396	1.30508	1.52155	4.55043	1.23447	1.39953	2.64549	5.42081	4.18087	10.1878	13.9582	5.21987	18.2913	2
FBgn0037166	12.3564	7.79843	12.2343	2.10992	0.914667	3.06804	2.02313	2.70503	4.07227	3.45267	4.16568	4.20585	2
FBgn0030893	1.25421	0.975127	2.72592	1.23257	1.0135	0.879835	0.994234	1.20199	2.27439	1.47148	1.99791	2.52715	2
FBgn0029814	1.91341	1.65003	3.42878	2.26152	1.36331	3.52477	2.03288	17.5358	18.8819	13.4487	32.6227	25.3157	2
FBgn0010583	9.03062	7.70924	20.714	22.3492	18.9867	21.8669	18.8975	22.7913	29.6665	25.8856	29.5911	27.5734	2
FBgn0083972	19.4871	73.867	44.3503	2.1067	1.90923	12.5416	9.19796	5.15159	7.20632	9.55601	4.28325	13.023	2
FBgn0038042	1.6212	1.24478	3.46764	1.0562	0.762729	2.58376	1.07696	0.996707	3.34613	5.41837	1.27867	5.18561	2
FBgn0034155	3.42507	3.45345	7.45502	4.63578	3.3544	6.6249	4.33962	13.569	18.4874	17.3038	17.9811	24.1358	2
FBgn0032633	2.79922	4.45581	8.83357	8.29102	8.44158	8.04496	8.3051	12.1825	16.4249	15.8056	16.5186	17.101	2
FBgn0035943	0.0140288	1.06468	7.55352	1.4624	2.45511	0.601168	1.34979	18.4901	37.9981	49.8031	37.8723	74.3263	2
FBgn0035942	3.32022	2.24153	6.12311	4.05394	3.50407	3.71104	4.05942	4.84813	5.25108	4.35182	5.74019	5.89106	2
FBgn0028996	0.764628	1.06719	3.38011	0.507394	0.660861	1.68927	0.499159	2.99938	5.9072	7.04753	4.84343	11.4346	2
FBgn0028991	1.65535	2.23698	6.79965	5.97718	6.11995	7.49835	4.30701	18.517	28.0293	11.9237	32.2629	31.573	2
FBgn0028999	1.6284	3.05918	13.5639	0.973534	1.67752	3.19375	1.15402	7.88308	14.8411	20.5678	14.1875	27.9321	2
FBgn0034708	27.7624	24.5657	34.7016	54.7773	59.7647	42.4293	55.5035	63.134	57.7911	65.5952	60.7841	60.8694	2
FBgn0261788	7.06795	5.17312	8.96239	3.00991	1.39265	8.44186	4.47519	15.9757	27.2543	30.4668	29.1915	40.7443	2
FBgn0000017	3.26558	5.28709	11.5406	12.0628	14.5755	7.66066	8.28672	20.791	32.7892	33.3941	23.934	35.2993	2
FBgn0032022	4.17238	5.66164	27.6068	12.4855	10.0313	13.3851	8.98387	9.1063	14.9269	10.6216	6.96289	22.1444	2
FBgn0036882	0.73796	2.97663	8.94088	0.52213	0.483934	0.939767	0.782757	1.09324	1.31626	1.42384	1.37661	1.55273	2
FBgn0033484	2.9681	2.78882	6.52102	1.45089	1.0026	7.01708	2.08405	2.3554	13.3372	29.4783	1.88486	27.1625	2
FBgn0067102	6.30767	6.5406	8.75941	6.39142	6.60101	6.16187	5.86267	10.0235	10.5296	11.9728	11.1241	11.8439	2
FBgn0003651	8.0096	9.77958	11.8251	2.02112	1.4573	3.87843	3.45123	11.6378	12.1141	13.5524	18.4424	20.8172	2
FBgn0019662	22.8445	19.8164	36.067	28.3413	22.3609	29.365	30.0661	28.1295	28.9189	33.4787	34.0655	30.0936	2
FBgn0031257	0.776543	0.951528	2.74198	0.50687	0.444897	1.71509	0.698942	2.54835	4.52407	6.25194	5.38407	7.07574	2
FBgn0035445	0.155369	0.407382	1.01972	0.564703	0.557583	0.529061	0.42116	2.61546	4.20125	6.61116	5.21293	7.05682	2
FBgn0259173	10.2056	14.3776	24.769	11.3398	7.19025	9.68389	11.4599	14.3019	14.4052	15.0229	17.5938	15.414	2
FBgn0011701	1.48314	1.33189	2.64462	2.41759	1.08955	4.81106	3.21145	5.13364	6.60142	7.87239	9.81092	9.37705	2
FBgn0029835	1.82376	0.518645	5.17768	0.718343	1.74595	0.238	0.551853	1.18487	2.48389	6.125	2.38499	2.99725	2
FBgn0029838	14.3833	32.0331	40.4175	1.66038	1.91313	11.3704	3.00014	4.02963	6.56257	13.0348	4.39491	10.5003	2
FBgn0033250	1.51354	1.42633	3.09796	0.811422	0.678744	2.41627	1.0006	0.946923	1.93189	3.29723	1.06972	3.59679	2
FBgn0033032	16.2421	18.3665	39.7963	139.872	139.049	103.662	142.707	144.851	141.889	158.307	148.916	188.82	2
FBgn0040465	0.90246	1.28275	3.5977	0.972682	0.731993	2.30584	1.11862	2.39591	5.84445	6.70102	5.7982	7.12411	2
FBgn0015663	4.81706	3.52304	3.94308	4.3506	4.0788	3.78189	4.44221	7.27988	10.6782	9.3479	10.5987	14.6816	2
FBgn0023388	8.59787	10.3078	21.172	14.9796	16.2886	13.0978	12.2832	17.8043	21.6561	23.4699	19.5666	20.884	2
FBgn0262423	11.3621	78.7372	4.83373	7.99476	0	65.5385	74.7721	129.63	83.5955	158.425	52.335	152.426	2
FBgn0086679	8.85613	10.0925	17.8505	11.8906	11.7483	12.1524	11.3689	13.117	14.9733	15.4107	16.143	16.6226	2
FBgn0035347	11.2322	13.3353	25.1115	11.35	10.7474	11.8482	9.69717	13.3322	20.2873	24.1359	15.3593	23.2377	2
FBgn0031065	1.18248	1.5903	2.66191	0.969464	1.13576	2.32442	1.19689	8.16182	9.92759	9.41264	14.4888	15.9371	2
FBgn0063127	11.8527	150.077	378.84	2505.66	2885.69	768.687	1063.68	7970.19	8913.07	7143.11	9573.49	14341.4	2
FBgn0026718	30.1988	29.5302	16.061	7.36176	5.92941	8.25361	10.2775	10.3268	8.5775	9.47767	11.8647	13.6788	2
FBgn0085442	24.437	18.9689	39.3834	47.3954	57.2661	40.0735	43.7495	55.7497	69.0679	84.5953	66.7814	69.1022	2
FBgn0004795	1.33255	0.928521	2.63644	4.98187	6.00524	5.3197	4.32065	9.79824	27.2447	30.5288	15.8703	41.8169	2
FBgn0037050	1.39184	2.20239	7.60516	1.9964	3.05334	2.94477	1.91921	5.36023	6.96739	3.99433	6.31001	8.40884	2
FBgn0038853	3.75817	2.98925	7.89352	7.71446	6.82465	6.63562	6.21311	9.45151	12.6666	10.9043	12.3551	10.18	2
FBgn0004108	2.69137	6.39137	20.9666	26.1261	39.9416	20.4911	18.0258	92.5109	126.562	136.252	136.813	186.686	2
FBgn0263109	0.442996	0.341277	1.21644	5.74173	9.76177	4.94329	5.26894	9.3672	19.4738	59.9469	12.7026	27.8431	2
FBgn0038588	1.67556	2.18863	4.42248	6.51001	6.42284	5.55634	5.52311	7.43768	8.70826	9.34743	8.41065	7.82123	2
FBgn0032409	5.80741	5.20572	13.9083	13.4118	11.8545	11.8448	12.4858	14.2867	16.8719	19.5904	17.8871	19.496	2
FBgn0001987	8.81868	9.13713	19.8026	40.6628	59.0352	34.3248	38.1166	52.9947	81.3133	84.4149	68.3188	89.6872	2
FBgn0259993	327.124	74.4464	128.541	559.918	520.689	428.759	612.489	553.894	621.229	600.028	586.033	609.435	2
FBgn0259994	4.43941	3.83117	10.3668	1.02677	0.0454384	8.22781	3.2582	4.30446	8.44925	10.8588	4.70321	13.6096	2
FBgn0261545	2.18662	2.76449	9.23172	4.84887	7.18603	6.32888	5.11273	9.73427	12.3186	10.3102	12.3652	13.3168	2
FBgn0031270	3.3022	6.20327	9.28101	22.8201	26.755	21.4067	21.3951	28.2838	28.9614	22.0477	27.6614	35.6497	2
FBgn0030581	7.49803	4.02935	7.59424	5.08667	3.16638	6.82767	6.17112	6.74672	6.85687	9.15214	7.67031	7.81549	2
FBgn0000242	1.86845	2.89576	7.00284	11.2079	8.34681	5.82381	5.03381	14.4176	19.234	14.0694	18.8452	21.6127	2
FBgn0031187	38.3814	18.3787	27.9284	20.422	17.6964	27.1854	23.4691	21.7519	28.0288	24.327	22.6159	22.9108	2
FBgn0040995	0.855382	5.20237	5.28738	0.993989	2.72584	1.39202	3.37355	6.43233	9.23402	13.3732	5.56221	17.9303	2
FBgn0034939	11.0819	7.8835	12.9041	36.9086	29.9541	30.2328	37.1282	48.8384	40.8035	45.7619	56.2565	51.3783	2
FBgn0040336	54.6831	15.6636	9.52589	3.13721	3.31224	4.2045	3.76169	3.37597	4.14607	4.40437	4.58443	4.09567	2
FBgn0004369	3.35665	3.08441	9.72548	16.1223	16.9741	13.4248	16.2559	18.8957	23.1994	22.5342	20.4465	21.6587	2
FBgn0004366	0.887616	1.27606	1.71446	0.694413	0.421448	0.726337	0.597483	0.410248	2.02489	3.11862	0.633262	3.25961	2
FBgn0022981	0.467291	1.51097	3.85526	1.15664	1.77793	1.07763	0.905733	1.51606	2.77001	2.1154	2.20107	2.97858	2
FBgn0037636	28.2435	58.6309	139.601	167.299	197.708	123.88	164.907	225.536	207.473	225.732	211.147	282.73	2
FBgn0034408	4.41793	4.56124	10.5995	34.1471	35.5398	39.5497	35.8755	45.0475	56.5655	51.1368	62.8907	50.22	2
FBgn0042205	1.43466	1.78398	3.35091	6.14673	5.75124	6.32817	6.21051	11.027	9.74756	8.02141	10.8619	12.0941	2
FBgn0039622	1.00626	0.293577	5.73207	0.751777	1.20345	0.51515	0.94419	0.711195	1.28905	3.29878	1.84794	2.68489	2
FBgn0024836	0.937258	1.81911	5.22234	12.4738	16.3349	7.94602	10.1349	21.3288	28.9728	38.7164	26.3566	31.8571	2
FBgn0002921	137.898	102.743	172.543	149.88	126.894	151.34	148.09	170.124	202.235	191.489	188.964	179.484	2
FBgn0036893	8.4673	10.1127	16.006	18.4455	18.1666	18.8207	19.7125	25.1963	17.3089	22.6875	21.6309	26.069	2
FBgn0026262	9.81712	16.6423	28.2199	51.2161	64.7316	38.4225	54.5087	67.1286	57.7912	66.4779	55.5189	77.038	2
FBgn0033915	6.37181	5.69883	9.86477	15.1005	18.7182	18.0095	21.1748	22.1154	20.5284	23.7826	22.0331	23.8069	2
FBgn0026616	1.3944	1.32407	3.11169	5.81418	5.56831	5.07498	4.46566	5.39115	7.53192	6.60327	6.16031	7.09815	2
FBgn0032629	0.959616	1.51033	4.50682	8.10626	8.79274	7.56601	7.23931	28.9941	26.2425	21.8787	35.5159	41.1706	2
FBgn0034403	1.9501	5.07725	11.2909	44.6299	49.7313	29.3025	47.519	58.6839	46.6757	54.3855	56.6925	56.7687	2
FBgn0262382	0	0	0	85.2471	0	648.019	89.1951	61.3711	1372.74	182.853	24.3533	467.125	2
FBgn0052529	8.23837	6.52192	11.3151	13.0575	10.9459	9.66049	8.90015	13.9765	18.2973	21.7542	15.4808	16.2504	2
FBgn0032421	15.6153	18.0156	28.0748	84.6353	98.2137	83.8005	82.097	89.2736	100.428	107.709	96.9244	109.017	2
FBgn0034269	7.65634	7.13322	10.4607	8.84514	8.18367	8.92427	9.76361	8.76177	10.3407	9.42932	9.40413	11.8949	2
FBgn0010473	2.67248	3.34982	11.2232	23.9367	19.9264	26.9028	29.8698	44.1713	60.2865	64.7119	63.9813	56.4116	2
FBgn0032305	11.4972	10.1348	23.8113	32.1387	34.3492	26.0328	31.1086	37.8263	46.6751	41.0407	41.1986	41.2778	2
FBgn0001087	9.52791	8.69792	17.1847	29.7313	30.7258	22.438	26.2928	34.4207	38.2998	40.6084	33.2217	36.7627	2
FBgn0001083	6.66914	6.13633	9.63673	9.04809	6.97253	7.49727	6.43729	11.4883	14.1189	16.9211	17.2375	16.3918	2
FBgn0039908	5.58798	5.2967	7.54641	14.6413	14.9281	12.3496	11.3366	16.3908	19.0464	14.0625	17.7727	23.9121	2
FBgn0054038	4.32307	1.3119	2.42053	9.49824	16.2965	29.7886	18.8761	18.2217	17.7193	12.767	20.3929	32.5341	2
FBgn0025186	4.00877	6.78919	16.3463	15.3566	23.0099	11.4159	11.4871	25.8858	41.0039	36.535	36.6213	49.6916	2
FBgn0051510	3.56058	4.35172	10.6074	17.3231	16.6812	13.5026	16.5498	18.6756	19.2315	17.7134	17.3805	19.4225	2
FBgn0036896	8.65916	7.21923	16.6684	25.3019	23.6794	23.5554	26.2465	31.6978	33.5747	28.4627	36.4473	35.0265	2
FBgn0031195	13.5822	10.9719	15.4289	23.0192	20.626	23.362	24.5321	24.9025	30.91	29.7405	29.0596	31.4669	2
FBgn0034013	1.20059	1.95931	5.05326	12.7624	13.2375	10.2476	11.6553	16.1023	22.01	16.0623	20.1493	23.1497	2
FBgn0034644	9.28303	14.6993	29.349	25.0619	30.216	20.3088	22.9681	32.7341	35.2583	36.0253	32.1784	40.489	2
FBgn0030592	0.845971	0.218349	0.692454	1.06028	0.904901	6.34132	1.83513	1.16591	1.95834	2.00862	1.6972	2.03375	2
FBgn0261287	0.307556	7.83876	19.4636	2.0654	1.28317	0.603237	1.87091	1.2621	2.11121	1.36057	1.40562	2.41219	2
FBgn0261284	39.3614	35.5539	52.6099	155.25	175.137	124.067	176.88	154.901	212.144	263.009	174.888	238.473	2
FBgn0037092	5.3416	10.3066	16.8337	45.4925	51.0411	37.3617	38.7306	46.8938	59.1857	74.2925	53.5015	71.9596	2
FBgn0037099	0.237962	0.532189	0.505868	0.666551	1.57846	1.44231	0.548106	1.81641	2.14874	5.3487	2.12397	3.67421	2
FBgn0027550	1.08083	1.11348	2.99407	1.14224	1.38949	1.9121	1.01189	6.2359	13.3716	17.1883	11.4631	28.9134	2
FBgn0038583	2.56629	3.40806	6.58632	6.0649	6.07372	5.15253	5.92086	7.85691	7.19811	7.24109	7.76748	7.52816	2
FBgn0000108	4.74185	5.09929	13.6591	5.38218	4.7692	8.43697	4.06642	33.5464	73.144	74.1711	55.7369	113.48	2
FBgn0259221	12.9958	9.59645	14.9088	8.39582	8.38789	10.9461	9.05255	10.7849	12.7532	12.475	10.9065	14.3445	2
FBgn0259224	8.69258	8.42325	16.4458	0.69432	0.656398	1.12525	0.185407	2.18549	7.49639	8.58087	5.37199	7.94256	2
FBgn0039026	22.7008	20.8469	37.8662	18.5417	13.1972	19.1726	15.3418	18.0851	24.8239	24.974	23.9961	22.1375	2
FBgn0029894	7.89038	5.46901	14.905	29.4798	17.4364	20.1684	20.3175	23.3022	30.4621	27.281	27.2723	31.4055	2
FBgn0033654	2.01113	1.52721	4.02691	2.40097	8.06867	1.51838	1.72132	4.96119	11.7174	9.50844	7.7602	13.4207	2
FBgn0030017	1.57783	1.57985	3.3106	2.40815	3.07019	1.72658	1.93628	3.18276	5.28101	6.04274	3.52714	3.93308	2
FBgn0030011	2.3676	2.17008	3.19039	1.32917	0.594037	3.27527	1.73726	3.16643	5.28215	5.86949	4.77471	5.22693	2
FBgn0036911	9.19396	6.70295	11.4815	13.2737	9.77006	15.0913	12.5121	12.395	16.1705	15.6878	13.9028	13.2637	2
FBgn0036202	1.20464	1.73357	5.11519	0.826758	1.48996	2.89547	1.30276	7.17478	13.9896	17.679	10.8872	23.3798	2
FBgn0027491	2.179	2.29845	5.74393	1.43786	1.6929	4.59315	1.48878	5.47211	12.0107	16.5016	7.22656	23.9318	2
FBgn0032147	11.0334	20.2526	29.5597	14.589	16.7069	14.4357	14.2205	16.4974	19.6841	23.4573	17.2047	22.8246	2
FBgn0033095	12.6169	12.2557	33.0326	7.33204	6.56615	8.22819	7.04164	9.67756	10.2978	12.9549	9.0433	9.9268	2
FBgn0032401	0.499821	0.678649	2.73806	2.73592	2.5672	2.07069	2.26724	3.51113	3.45917	3.34283	3.33545	3.669	2
FBgn0261444	9.85136	10.941	21.328	24.7428	25.4128	17.6771	19.2185	36.2083	48.4745	46.6908	42.3818	43.0391	2
FBgn0043070	15.1037	26.7532	55.3599	27.5699	28.883	26.4881	25.1732	30.572	33.1352	37.9542	29.3217	39.1697	2
FBgn0037525	3.23862	2.84062	6.62851	6.5431	7.56536	8.68889	8.00826	22.1735	40.4506	38.978	30.7004	49.9571	2
FBgn0000097	6.92454	6.16516	15.1674	42.2515	43.3687	37.1519	41.8112	95.1078	109.878	101.368	138.576	126.044	2
FBgn0011666	4.1912	5.2749	16.7391	45.0782	43.3158	32.2812	32.6226	57.1108	69.5948	49.2128	67.4121	74.7257	2
FBgn0027575	1.28114	0.8531	3.28963	1.31707	0.798842	3.03491	1.96628	2.94676	5.68209	3.44994	4.0771	7.56351	2
FBgn0262733	1.68231	5.23552	12.7731	21.703	27.6168	14.5558	16.8771	31.2905	48.2902	53.5848	36.1221	61.8692	2
FBgn0262730	3.13618	3.70409	9.68858	12.1848	12.2843	9.89671	10.7084	17.271	23.7659	24.3851	18.7947	20.2638	2
FBgn0052702	5.60849	4.70325	4.92084	1.34931	1.64711	2.52261	1.82464	3.0591	2.61221	3.37027	3.85113	2.19594	2
FBgn0262699	7.3245	7.44204	19.8795	14.9955	11.6496	12.4352	11.9768	14.8033	13.8507	14.9172	16.4707	17.5205	2
FBgn0261575	48.9775	61.1758	16.7566	0.934267	0.448044	1.13748	0.664045	0.718346	1.06012	0.754392	0.680178	0.977351	2
FBgn0259244	2.91408	4.79784	12.0171	32.6283	45.1839	40.6603	53.962	72.4051	60.4987	72.1018	89.7958	72.956	2
FBgn0259246	1.86845	1.50289	3.60949	0.592996	0.350438	1.59878	0.507611	3.3311	14.3954	22.8409	4.33041	17.3511	2
FBgn0039000	2.92637	4.06869	8.71839	19.5369	22.3496	15.6626	17.6793	27.3771	37.2715	32.79	32.4567	32.8829	2
FBgn0263569	8.27741	0	9.37554	3.39268	0	12.505	1.16269	9.69466	6.95118	12.6471	14.7162	19.5772	2
FBgn0038916	5.84195	8.28596	7.5147	5.81456	2.58025	7.27155	7.44155	5.36941	9.37894	4.92853	7.26398	13.3812	2
FBgn0031610	1.65321	2.2812	5.01241	7.78546	8.10264	6.70145	7.58512	17.9634	15.5241	14.7544	23.3524	22.9514	2
FBgn0037339	8.92343	18.2953	38.792	12.1992	11.3608	11.5118	11.7395	13.4726	14.8183	13.2544	15.047	14.3627	2
FBgn0000370	413.211	391.098	627.253	1179.47	1137.78	951.171	1328.07	1400.2	1099.08	1579.76	1221.66	2223.43	2
FBgn0032123	10.1369	8.00804	16.3536	7.41323	13.7057	8.23747	6.41377	10.7652	20.6105	29.7557	15.1834	24.8451	2
FBgn0032876	5.06308	8.34242	11.6479	16.276	18.7552	14.7114	15.8167	20.091	21.6997	21.6895	22.2741	23.5138	2
FBgn0031397	2.28681	3.96181	4.46447	0.860781	0.896336	1.1973	0.632109	1.07178	1.05094	1.5875	0.843622	1.53928	2
FBgn0261801	1.18052	2.03116	5.23963	32.407	38.9983	16.4626	19.6101	34.1329	46.1443	57.2577	35.6614	75.404	2
FBgn0261803	13.3032	4.95899	10.5783	14.0043	33.381	28.1656	11.8204	17.2541	39.9858	27.5495	26.3753	63.1236	2
FBgn0005649	35.929	37.373	64.5675	106.347	112.264	85.6056	112.146	132.433	119.089	129.476	122.137	125.612	2
FBgn0002932	2.81288	3.84696	5.82456	7.86978	9.54572	7.71797	7.52971	16.9142	20.8794	45.8198	24.4642	29.2517	2
FBgn0002023	4.1255	3.36115	5.42515	0.526493	0.449211	0.608691	0.296353	3.14339	5.40613	3.58308	4.81931	7.27252	2
FBgn0000568	17.4523	15.3171	73.1856	29.965	45.0908	25.1142	18.2219	38.0283	73.9008	77.0676	44.8894	71.8822	2
FBgn0027515	11.615	10.569	21.7411	17.2667	16.922	16.4652	15.4334	18.8254	20.3915	23.2241	19.1188	18.602	2
FBgn0015520	3.4366	6.90556	21.2506	18.012	18.696	13.0461	15.171	18.0751	24.0024	24.1026	23.2889	22.8785	2
FBgn0004244	2.10312	1.62344	3.03676	0.658601	0.162805	4.158	1.19904	0.522181	0.912099	0.915598	0.813914	1.2635	2
FBgn0260720	0.0848949	0.256543	0.695623	1.73123	1.32717	1.18628	1.37173	1.91961	2.16652	2.05394	2.54874	2.23757	2
FBgn0032485	5.10441	6.33174	12.2342	10.38	9.91846	9.91794	10.0265	11.8574	14.7645	14.8408	13.9723	15.6765	2
FBgn0003053	8.88426	6.62216	11.8845	2.45498	5.39722	2.82978	3.60652	24.2266	40.6122	39.7836	47.9652	58.7606	2
FBgn0035285	37.1241	33.5268	68.3421	69.8021	60.2609	64.3418	69.3066	72.3921	89.9629	136.336	91.2858	128.166	2
FBgn0263097	11.1958	7.9949	27.6866	5.94139	6.07519	15.6135	10.6588	12.7627	11.8463	16.9416	15.1881	14.591	2
FBgn0039916	0.0499212	0.2639	0.754251	0.541401	1.21408	0.348064	0.465974	7.44648	17.0441	24.2963	9.86724	43.8913	2
FBgn0003888	12.8337	20.3644	93.5706	59.3515	144.091	73.0441	66.1971	209.907	354.962	372.743	403.025	484.646	2
FBgn0033677	10.4446	11.4033	16.0144	28.5844	28.6475	32.9328	24.3446	27.4147	28.3134	32.8431	29.293	38.8135	2
FBgn0028400	1.87867	2.81692	7.74451	1.98009	2.09424	5.15449	2.27311	11.3299	21.3112	25	18.303	41.1115	2
FBgn0035636	4.06289	0.691701	2.06116	3.35249	8.75606	26.1615	4.99253	28.8314	33.3785	18.9472	52.6918	53.5072	2
FBgn0002592	2.2277	5.67421	21.3291	55.9977	127.846	34.6814	43.9754	109.288	162.194	201.142	149.682	224.131	2
FBgn0004102	2.30309	1.73246	5.27233	29.3938	21.5849	26.194	24.0595	26.3692	46.8754	32.1443	27.2118	50.0306	2
FBgn0040271	2.6203	2.55957	7.69495	12.2942	17.7066	13.599	12.8687	16.8888	21.8227	32.737	19.9912	21.1345	2
FBgn0025641	3.8118	3.99938	8.93862	4.84509	14.4256	7.01181	5.77692	9.03293	22.7105	24.2901	12.648	24.5213	2
FBgn0034008	2.32625	3.51566	7.14771	9.72776	9.67388	7.8975	10.6086	13.1879	9.85227	11.4459	11.8065	13.8915	2
FBgn0052137	25.4404	28.5741	35.4437	14.9262	15.8508	21.9273	16.379	20.6781	22.2925	20.757	25.324	27.253	2
FBgn0052132	2.43703	3.1535	5.77025	1.14365	0.809284	2.65648	1.41064	9.18834	13.3696	10.6617	13.8998	15.7331	2
FBgn0025692	93.1097	53.5774	23.5993	3.05403	2.23891	2.81152	3.75735	8.00198	8.96853	7.77924	8.38922	22.9859	2
FBgn0037949	2.28994	3.94974	7.71559	5.55812	5.48849	4.81813	4.50949	6.41945	7.25231	7.47806	7.06399	7.21476	2
FBgn0259707	2.07806	2.34947	4.03846	1.21962	0.401641	3.82601	2.17946	1.94651	2.91895	3.89228	3.05485	9.90298	2
FBgn0050379	0.240642	0.318102	0.8902	0.631399	0.039761	0.767046	0.428905	0.438203	0.511613	0.767768	0.41272	0.893475	2
FBgn0037309	1.43028	5.41079	7.14716	8.22605	7.21105	8.18377	8.57937	14.2462	12.8716	13.265	13.7667	10.2672	2
FBgn0030869	8.68024	10.1354	21.0091	18.4773	18.3199	12.6575	14.7832	21.005	25.1658	23.8707	21.8261	25.764	2
FBgn0023531	1.47865	1.46095	4.41948	4.23776	3.87224	3.47375	3.82498	6.07691	9.2261	7.14886	6.99433	9.06995	2
FBgn0039381	9.10211	12.1179	27.7465	48.3067	48.3805	35.908	42.6932	47.8846	66.2663	61.0879	60.8647	72.3185	2
FBgn0046704	8.19278	7.04672	11.3451	14.1701	11.8312	12.0516	12.3039	15.3245	19.6323	16.6364	14.5502	15.2483	2
FBgn0087007	24.0078	23.0364	28.4735	36.3559	48.0094	43.0678	47.5512	55.2237	67.8371	101.683	58.7178	77.9262	2
FBgn0034158	4.16893	5.09042	11.3234	19.22	14.0709	15.421	16.7988	23.2728	24.7723	21.6041	21.5559	26.8063	2
FBgn0031381	86.7699	108.392	285.05	25.8496	18.1482	41.8295	18.9089	30.9108	64.2045	54.3321	60.1018	49.1647	2
FBgn0017590	0.844723	0.768317	2.83618	0.545056	0.840489	1.66281	0.46864	4.7519	8.29084	7.15398	7.04383	13.4636	2
FBgn0031775	1.02381	1.20847	2.55847	4.3561	2.91802	5.92872	5.31455	34.4748	59.6659	57.2003	78.79	76.2504	2
FBgn0033876	2.42767	1.73483	2.97195	1.13831	0.568667	4.81697	2.09388	1.81443	2.13731	3.76805	2.33464	4.37873	2
FBgn0033872	2.89835	5.15325	4.36781	2.41465	0.20632	4.28599	4.0804	2.88789	8.46649	2.55809	3.36088	22.1089	2
FBgn0040397	6.95602	5.68326	8.11978	20.0085	26.5827	23.502	22.5979	31.1579	34.1757	34.4732	40.4822	35.1902	2
FBgn0040395	8.1357	11.4617	20.0209	16.0069	15.5843	17.3776	16.4345	20.6507	24.3238	34.7205	23.6674	31.6982	2
FBgn0028421	4.04313	5.071	10.9266	7.14799	8.09959	6.5481	6.52018	8.01255	12.3119	11.6717	7.42362	11.2631	2
FBgn0032838	1.31317	3.17205	5.76987	3.12455	4.35488	6.12494	7.26426	14.2509	18.0001	25.3656	23.8629	19.4405	2
FBgn0033243	0.61289	7.77275	20.0679	1.0628	0.504375	0.98309	1.52119	1.84702	2.63822	2.22918	1.84237	1.99706	2
FBgn0037923	3.90077	5.32115	5.96448	13.5633	7.23449	8.99015	11.9528	13.4208	16.9789	22.2389	15.6261	17.1305	2
FBgn0036144	3.31554	2.88776	6.78227	0.911693	2.28031	3.38741	1.34342	1.16602	3.92796	1.45807	1.37269	3.03998	2
FBgn0058178	2.1404	2.46641	4.49204	8.16546	6.15687	8.81678	8.32197	9.05716	7.60313	8.62541	8.2335	11.3757	2
FBgn0030847	9.59462	16.092	32.1083	23.8791	22.7542	19.8234	22.2858	25.9354	25.5844	34.7326	27.8822	31.0063	2
FBgn0029761	3.14994	1.75729	3.92642	4.94679	5.25633	6.46265	6.99141	11.7025	15.2843	16.5783	17.9726	17.5555	2
FBgn0052815	1.42904	1.38355	2.99874	0.861343	0.913927	2.21954	0.880847	1.63191	5.00193	6.27872	3.07664	8.11214	2
FBgn0261984	11.9045	11.7374	23.0469	13.2166	13.0113	11.6421	12.7905	14.8172	18.3409	18.0281	14.9662	14.4939	2
FBgn0028369	1.33961	1.59478	3.62704	4.67615	6.58898	3.49693	3.27289	13.5079	22.1366	23.3126	20.0305	27.9514	2
FBgn0020391	1.50617	1.96117	4.16594	0.891267	1.04534	2.31207	1.28489	2.8756	5.30452	6.80428	4.97199	6.10961	2
FBgn0052369	9.14399	10.9407	25.6207	12.7096	10.5764	12.1311	11.9292	11.3807	14.2856	12.306	10.4304	12.6392	2
FBgn0031675	1.00181	3.06643	4.92989	1.12427	1.20476	1.46373	1.64129	1.75245	2.38387	3.00089	1.94252	3.54507	2
FBgn0041605	18.6507	13.7723	13.8703	1.38944	0.333056	22.2755	7.24577	1.59634	3.62941	5.82916	2.90689	16.0902	2
FBgn0036285	0.854604	1.61149	2.97421	2.26742	19.1399	8.0734	11.4187	12.9525	20.5531	21.4863	17.8215	20.4043	2
FBgn0038330	0.846683	1.30138	5.33391	0.692784	0.643434	1.26976	0.569678	1.00605	1.8469	3.01396	1.628	2.45542	2
FBgn0039883	0.892333	1.03947	2.22839	0.952864	0.468311	1.82007	1.03268	5.2931	5.56938	4.79248	5.79324	7.95811	2
FBgn0002609	2.14908	3.5376	14.2301	50.2295	42.401	30.5793	28.3628	36.3204	85.114	64.5133	54.1592	68.5291	2
FBgn0052177	11.2892	11.5593	20.2025	19.5662	17.0474	19.5069	24.5335	25.3195	23.0204	25.0186	27.403	30.522	2
FBgn0052179	5.32123	6.31352	14.8852	19.7726	21.857	13.3752	18.1452	22.8516	23.9204	29.2492	25.5758	40.3083	2
FBgn0003137	36.9554	19.255	13.2667	13.2365	20.6136	30.1659	20.5209	19.2014	32.6307	43.2592	33.9738	36.3372	2
FBgn0037902	1.22964	1.38008	4.44707	2.85619	2.07189	2.76109	2.42548	4.51574	6.2494	6.22123	5.88523	7.80553	2
FBgn0053774	1056.45	787.664	490.435	1146.34	1103.94	856.773	1952.33	1420.58	1027.91	2179.9	1166.66	3148.22	2
FBgn0259740	60.2643	45.8722	47.3246	157.943	241.866	131.686	141.342	209.301	216.005	156.898	192.152	327.086	2
FBgn0259745	2.14021	2.87327	6.88649	11.2254	12.9116	11.7512	15.5274	25.5716	24.4872	22.3867	28.446	24.7444	2
FBgn0003353	0.498581	0.917721	2.31107	4.6772	5.12334	3.72776	4.95951	8.3656	8.88113	8.20977	8.58454	9.99245	2
FBgn0263648	0.00673536	3.39859	1.4469	0.569499	0.962534	0.130269	0.612083	2.70382	1.27959	3.63868	1.46119	2.34896	2
FBgn0016672	6.44353	5.82074	9.5898	19.2801	17.9216	16.6636	17.128	30.7851	40.6395	27.3165	42.3109	39.7478	2
FBgn0027865	9.12399	6.99379	12.3492	22.1901	20.7541	26.6844	26.1805	28.9575	28.4978	28.6516	29.4228	37.1923	2
FBgn0040079	6.42107	8.47137	14.1791	21.5639	16.3438	21.4085	22.679	20.9127	22.1849	22.3642	21.5306	24.2674	2
FBgn0029944	5.98262	8.05233	19.3859	40.3751	36.9263	26.015	34.1656	40.1141	41.0607	41.73	39.8658	45.2651	2
FBgn0036614	4.14111	3.90781	5.64438	8.30355	9.64192	7.92706	8.17737	10.109	8.88848	9.79829	10.0078	10.3207	2
FBgn0015380	1.86106	5.94418	16.9772	36.8239	68.1473	48.8394	66.6315	88.8627	90.3234	91.0946	120.912	114.581	2
FBgn0066365	1.64679	0.198678	0.249757	0.639257	0.673456	13.07	4.80673	1.96027	3.74922	3.54108	3.69398	6.01842	2
FBgn0263077	20.7457	18.0528	23.4628	3.12554	3.6164	5.60323	4.48581	5.58952	7.57288	8.83844	11.9831	11.8678	2
FBgn0250823	30.9188	28.9507	64.9655	89.3914	99.7883	75.8039	84.2041	101.628	120.514	132.191	112.183	116.952	2
FBgn0000313	0.091025	0.00100914	0.959591	2.40849	3.21701	1.19479	1.53929	4.69317	23.2197	33.2472	7.84571	39.7554	2
FBgn0039923	10.8167	12.057	23.9472	37.3038	41.2945	34.1355	40.6286	49.1891	45.525	42.7867	40.7478	50.0061	2
FBgn0033347	0.477485	0.264439	0.937601	0.915691	0.673464	1.45688	1.10646	1.21952	1.24496	1.31927	1.08556	1.6136	2
FBgn0004567	0.744676	0.938093	2.29772	10.7381	13.5813	7.91337	9.2005	12.5362	18.5675	14.6879	13.8978	21.2414	2
FBgn0004569	1.04485	1.47845	4.05235	8.71295	7.10456	15.1871	13.3966	27.6767	38.4731	30.3096	50.8479	52.8964	2
FBgn0031814	6.86438	6.98257	13.9235	7.52207	8.42864	7.81521	7.1647	8.63307	10.4838	14.6525	9.80687	12.4479	2
FBgn0003117	1.0027	2.12418	3.65247	5.88101	10.4108	4.91018	5.07347	9.67513	12.0448	14.222	10.329	15.1041	2
FBgn0003371	41.1584	44.644	79.7129	74.7412	77.2251	69.0379	75.9369	91.6911	88.4647	92.3217	83.2352	86.1176	2
FBgn0010497	54.7974	38.9547	24.2543	15.0726	8.79035	14.3052	10.7035	12.0986	12.2318	13.3705	7.44625	20.9703	2
FBgn0083987	12.6825	9.05705	45.6803	62.0912	26.4201	59.9462	44.2237	63.1007	68.6024	138.318	60.5996	117.455	2
FBgn0051997	100.137	205.417	211.439	98.3322	195.177	202.506	156.702	211.2	176.362	212.995	239.137	421.052	2
FBgn0037679	4.21117	4.87331	7.5182	10.7534	6.44646	8.2572	8.08682	9.90261	12.3109	10.3029	13.5098	12.8347	2
FBgn0030805	1.11748	3.19326	7.14734	25.6476	32.7536	17.1814	24.2843	31.2051	36.8908	60.9492	38.2657	41.3044	2
FBgn0082582	72.4339	61.4664	102.862	108.922	95.3646	109.731	92.6726	112.217	159.737	199.029	158.439	184.501	2
FBgn0014343	4.66999	4.97034	10.2225	20.9364	17.8796	19.8891	25.1776	28.8374	32.4234	28.847	35.057	35.157	2
FBgn0027335	27.2882	34.9491	65.8106	59.9377	56.6251	52.2077	63.7483	67.1433	66.3672	79.1469	75.7897	85.0228	2
FBgn0038524	9.34437	11.046	13.8485	19.2177	19.0307	19.6981	19.597	21.9459	20.2442	20.6675	20.0299	20.5241	2
FBgn0013342	11.5999	8.5832	21.4402	5.23329	0.574802	19.397	7.35985	14.6068	25.0934	39.3113	15.6734	52.2565	2
FBgn0086910	8.17046	13.3041	48.8489	112.198	116.794	69.7152	84.9641	162.647	186.176	203.419	163.221	173.783	2
FBgn0262871	13.2003	10.8631	18.0641	18.1803	19.4975	24.5453	19.8524	21.5159	21.788	22.0516	22.7461	21.9648	2
FBgn0000464	3.47616	3.76032	7.19398	11.6835	13.0853	9.76154	10.5868	14.1544	18.192	20.144	15.718	17.7303	2
FBgn0027101	8.1387	12.908	25.5437	36.3311	44.747	30.2456	36.7681	42.2868	43.6509	40.9029	42.4143	51.1354	2
FBgn0250789	76.9135	42.5341	49.2837	74.3071	67.6137	72.7304	74.3981	98.3937	105.557	95.025	108.127	94.263	2
FBgn0032895	2.82709	3.43422	3.79966	8.73095	8.58725	14.9745	13.0043	130.129	73.9177	51.6968	194.551	138.864	2
FBgn0013759	11.177	10.8388	20.2071	19.7485	17.1338	20.1004	16.6221	21.2206	26.9274	30.8612	23.7397	24.1409	2
FBgn0013753	6.43946	11.0724	25.5379	79.0456	78.6235	62.8873	85.419	115.002	96.8555	102.797	122.441	146.612	2
FBgn0032233	0.492045	0.424344	1.57051	0.862484	0.960897	1.14866	0.17847	1.99839	2.62599	2.63062	2.0379	3.22813	2
FBgn0032234	3.55764	3.80854	4.03857	3.8375	3.64967	2.99752	3.91153	3.35785	3.20992	4.35642	3.63582	5.02762	2
FBgn0010407	0.632499	1.5438	3.87744	1.74834	2.80886	3.32108	2.7111	7.10231	10.0294	10.3092	12.2913	16.8305	2
FBgn0259834	9.50313	6.64439	7.45176	2.01218	2.86803	4.23281	1.85007	1.98639	5.36347	7.20807	3.50953	6.20909	2
FBgn0016754	3.03484	4.15605	13.1104	9.0253	9.73439	7.01577	6.17471	15.3883	22.4362	24.8	24.2703	22.8396	2
FBgn0020278	5.88679	15.7865	37.1594	13.67	16.3263	13.9614	14.7821	28.9747	33.473	34.5197	42.7417	45.4302	2
FBgn0261261	3.15219	6.76715	11.1662	5.80588	3.05045	5.27816	5.17714	8.73287	10.4194	10.3666	9.94823	11.6705	2
FBgn0016059	11.8342	14.4836	26.7325	76.3146	91.3637	49.7481	70.9937	109.357	101.947	103.192	114.279	123.923	2
FBgn0034650	9.17258	8.95288	16.6361	23.7254	24.3914	19.1415	23.7399	29.0945	28.8313	30.6377	30.0993	28.717	2
FBgn0038143	1.13469	0.908156	1.83897	0.938543	0.175807	3.24033	1.49748	0.848412	1.2404	0.560599	1.25223	3.54487	2
FBgn0050021	6.80585	4.48475	5.02566	4.81964	2.45293	6.85766	3.66501	3.81623	4.77485	5.10515	3.78441	5.91437	2
FBgn0038917	1.71975	1.34868	3.24203	10.9134	12.4839	7.58644	9.56449	13.3893	14.2219	14.6452	14.4906	15.9861	2
FBgn0032935	5.73921	13.4108	35.2055	5.57682	5.32025	12.0102	7.46868	5.93125	6.83651	6.9747	7.5683	7.43836	2
FBgn0033558	0.279615	0.255384	0.82741	0.855414	0.455277	0.846588	0.764608	0.908242	0.971818	0.72867	0.684004	0.986872	2
FBgn0038814	0.110354	0.100599	0.400906	0.523288	0.863212	0.331158	0.102487	1.01787	1.69238	1.24831	1.77113	2.77305	2
FBgn0052476	6.70403	6.76916	13.2888	2.05179	1.1427	2.67675	1.01936	1.5393	2.14073	2.14215	3.15581	2.9034	2
FBgn0039734	0.415233	0.928158	2.50372	0.689657	0.911428	1.16834	0.692425	2.46202	5.34065	5.55289	4.56628	8.67456	2
FBgn0262742	17.0788	20.2399	39.5013	81.4274	93.3697	76.247	89.3044	121.485	145.488	182.968	167.266	163.109	2
FBgn0039152	11.7309	14.2118	7.5772	1.51685	1.35241	2.34767	1.86165	2.18029	2.64036	2.31574	2.51151	2.69595	2
FBgn0039157	2.80108	3.13943	4.47731	5.81266	6.93375	4.94926	5.63206	8.37512	10.158	14.5076	8.606	9.72348	2
FBgn0016930	3.73238	4.30268	12.5829	23.1052	43.6057	39.9967	39.5037	54.964	55.8361	91.8857	62.7919	73.1439	2
FBgn0039480	6.74095	9.4847	1.27619	14.4458	20.1683	36.5136	18.0561	15.3297	20.9168	16.8855	17.7789	35.9461	2
FBgn0039487	14.3853	11.9516	15.4543	9.66995	10.4983	12.2042	11.2738	13.2669	12.657	11.6508	11.7357	13.3076	2
FBgn0038682	35.4175	24.321	31.5979	9.30235	29.9165	16.3503	14.1945	31.9086	35.3651	49.9226	49.3031	43.2253	2
FBgn0034518	3.77126	5.12608	7.11666	6.74011	7.18626	6.15922	6.67066	9.43079	9.67255	10.1806	10.269	10.3495	2
FBgn0010309	2.03021	2.15637	4.44773	5.32013	4.58913	4.76445	4.96724	6.55817	7.47067	6.41258	7.2796	6.61657	2
FBgn0010300	8.41488	14.7467	48.1638	83.6685	83.5365	65.3954	79.296	106.211	133.159	113.251	107.036	113.123	2
FBgn0036980	7.45818	15.1808	29.0503	29.1474	29.1811	20.4354	25.2593	38.0274	36.9824	39.6733	35.8907	40.6874	2
FBgn0002576	0.379132	0.746999	1.24336	2.41397	6.75596	1.30722	1.7564	21.129	37.2951	34.6184	36.3088	56.0428	2
FBgn0263197	17.5629	16.9489	27.984	31.1816	33.9979	31.5513	33.8466	37.2316	39.5981	41.8034	39.5484	35.1702	2
FBgn0263219	1.69953	1.4237	3.49791	4.89055	3.60179	3.23518	4.19388	6.43212	7.9937	9.43955	6.25997	5.87012	2
FBgn0043806	10.5366	9.25036	20.7597	11.029	5.06059	18.8718	17.097	27.0313	54.9746	50.9112	47.5233	81.2732	2
FBgn0016032	2.21346	3.01	9.03823	4.38971	3.36264	5.13387	4.69811	14.3523	12.1345	11.6824	17.5192	23.1096	2
FBgn0040900	0.0707747	0.423836	1.77641	0.681944	0.696006	0.114232	0.474493	0.454698	2.19886	1.30412	0.815188	3.35098	2
FBgn0259109	0.864285	0.817755	2.28079	0.668196	0.267515	0.917739	0.258045	0.767134	1.66512	2.42334	1.10671	2.15232	2
FBgn0259108	1.24991	0.848729	1.53034	2.14874	1.36083	2.23852	1.36076	9.63084	13.6855	11.7744	16.2294	16.7542	2
FBgn0259100	2.29904	1.95572	4.88239	2.86823	3.93366	4.11869	3.34507	6.13519	8.69469	11.0001	7.94948	11.1736	2
FBgn0039749	0.0229868	0.216237	0.220454	3.82317	1.22446	1.11088	0.677474	4.13658	7.06139	9.69096	3.99018	12.3154	2
FBgn0040796	0.744805	0.273068	5.71038	3.43309	7.00777	2.58784	2.17157	17.0334	92.8788	27.0811	46.7214	101.615	2
FBgn0035246	4.54603	9.18576	22.1539	3.74665	6.17247	10.2663	4.49008	22.523	33.8864	22.4352	34.635	56.0343	2
FBgn0035243	108.728	33.9082	124.629	177.595	130.383	181.957	178.288	148.985	169.953	175.563	171.037	197.746	2
FBgn0013305	37.6379	54.0676	104.318	72.4676	89.0188	63.4362	71.4382	84.3776	79.2999	85.1915	80.1777	102.986	2
FBgn0052676	10.6802	8.85396	24.6748	19.6057	22.6736	12.6043	18.1262	29.2116	34.0596	24.955	34.5347	43.0231	2
FBgn0052677	1.1102	0.864835	2.76511	1.25865	1.28306	1.68873	1.07844	10.0483	22.9721	19.3972	17.7268	26.7373	2
FBgn0052675	25.4303	15.7545	25.8396	12.2338	9.96745	12.8436	10.4915	10.7845	16.5722	14.7054	15.2236	13.8629	2
FBgn0025790	12.1658	8.09999	25.9865	49.8883	46.5044	38.7441	46.1244	47.786	57.4776	51.4349	61.8169	60.8421	2
FBgn0259481	17.4184	20.3191	42.3701	11.5529	12.8233	18.6758	10.9288	19.257	18.8406	22.0419	22.2489	24.9285	2
FBgn0039170	0.172438	0.434868	1.10999	1.74623	1.72428	1.42819	1.66218	2.14945	2.25419	2.10544	2.3436	2.60991	2
FBgn0085367	0	0	0.139792	0.568907	0.75483	0	0	4.34539	3.10868	3.97773	2.55458	9.59749	2
FBgn0085369	0.250763	0.492987	1.10189	0.783874	0.423603	1.42951	0.985034	1.99421	2.03519	2.96749	2.74883	2.9414	2
FBgn0015791	32.8176	36.289	85.0545	53.8963	41.4767	54.6207	52.2872	54.9736	66.2104	67.1191	65.1374	61.2124	2
FBgn0015793	12.123	12.925	26.858	20.2337	17.8981	17.7562	22.5228	23.6781	25.6222	27.1274	27.1499	29.142	2
FBgn0035720	62.3545	66.9683	145.7	144.078	175.144	117.537	121.346	189.843	223.035	239.695	181.852	234.547	2
FBgn0050115	5.25482	6.47868	14.5111	7.38287	8.78601	8.74114	8.73021	13.5939	17.5172	21.2439	18.8475	17.6301	2
FBgn0083952	0.0657183	0.449688	0.863987	1.08849	0.219236	0.33345	0.41467	2.73465	2.05853	2.68031	1.32329	4.06935	2
FBgn0026375	5.55138	6.5316	14.5013	24.6364	24.6492	19.3339	24.0031	29.3948	34.1102	36.0932	28.8274	28.3504	2
FBgn0051076	11.0273	38.8042	155.8	4.60544	2.54101	9.48279	3.03715	11.3119	14.3716	10.6273	22.5637	20.6672	2
FBgn0025936	11.5809	16.0537	28.1679	67.2236	73.3379	53.7822	68.1337	80.5615	67.1566	80.2446	80.2914	87.1941	2
FBgn0039723	0	9.37167e-103	0.396964	0.66299	0.258062	0.748429	0.990052	2.09629	12.9893	19.6248	4.68077	22.4366	2
FBgn0037619	2.24612	2.10399	3.62836	7.19445	5.20725	4.23635	5.15858	7.14852	7.84351	8.81813	8.07838	8.21095	2
FBgn0040928	0.68978	0.551769	1.46417	4.93594	3.09752	4.45438	4.24167	3.92487	3.77733	4.3528	4.76266	6.37107	2
FBgn0259685	6.92293	7.24955	14.8813	38.2715	42.0424	33.9467	42.1452	45.9403	54.8362	55.9329	52.0533	44.4943	2
FBgn0035260	0.502488	0.719979	2.36402	1.98028	3.21472	1.17028	0.819825	5.85339	13.7141	15.5569	9.21541	18.9837	2
FBgn0260451	0.671159	1.66161	3.16715	0.666429	1.17583	0.0745793	0.653618	4.74308	6.94078	6.02731	2.79133	12.6744	2
FBgn0260458	5.57407	5.88684	7.41562	2.39551	3.29325	4.64546	3.48072	5.58902	5.60933	5.44308	6.39453	6.815	2
FBgn0003295	0.151022	0.906175	2.35487	2.50794	5.00285	2.53896	2.29075	37.6325	53.4955	68.2423	56.4484	105.201	2
FBgn0030766	2.50535	3.16083	5.93907	7.71986	10.7772	8.27396	7.37505	11.0157	12.6397	12.0776	13.4391	13.8053	2
FBgn0011259	1.35563	1.73737	6.42113	7.77234	8.158	5.83362	5.83115	10.0353	16.047	16.4018	9.46141	14.3975	2
FBgn0036821	20.96	45.0753	53.816	7.05652	4.89182	14.7378	9.64515	13.6236	19.5599	23.1777	20.105	24.4438	2
FBgn0002917	0.648741	0.585847	1.52016	0.543245	0.360021	1.1533	0.617572	2.27075	4.37604	5.77404	3.28056	6.69728	2
FBgn0051363	24.4691	56.6563	219.844	282.408	487.434	217.705	247.914	399.335	622.148	819.218	563.636	791.617	2
FBgn0004875	11.0077	11.4929	19.7259	31.7824	31.2246	25.973	33.5658	36.1715	36.5396	36.581	35.9674	37.4065	2
FBgn0039286	0.428025	1.18941	2.57682	10.3962	22.3843	12.2478	16.417	49.6043	45.0207	36.0685	79.5133	52.2218	2
FBgn0010415	49.5739	91.5723	183.865	135.133	133.007	105.202	103.56	133.514	184.677	151.928	151.655	196.472	2
FBgn0053200	1.48455	3.38715	6.90716	6.60192	10.1308	5.62571	4.17876	16.3263	22.3876	124.986	24.9025	47.2896	2
FBgn0024187	8.45859	6.62224	12.7821	8.54389	8.1729	8.67761	7.7342	10.3912	12.2724	14.8469	11.7694	11.3792	2
FBgn0035574	2.44467	6.13192	15.4054	4.1505	5.46772	7.00725	4.72623	12.6556	12.976	21.2201	18.3686	15.2875	2
FBgn0033358	0.922713	0.723095	2.30569	1.37974	0.20857	2.61395	2.19198	2.75471	4.58163	6.38598	2.28088	6.03088	2
FBgn0000216	4.42608	15.6733	24.0965	151.518	114.878	214.549	272.464	329.526	306.66	254.245	458.958	522.256	2
FBgn0035995	17.266	18.348	46.0244	14.1031	13.3835	11.4618	12.2603	14.5579	18.0356	13.1061	16.611	18.6952	2
FBgn0041723	0.491425	0.614371	1.9363	0.518807	0.251407	0.777057	0.436886	1.18108	2.55928	3.09721	1.97695	3.68501	2
FBgn0011758	0.439948	1.03803	2.81171	9.60857	10.1248	5.0707	7.08186	30.2933	29.9173	38.7717	36.8771	73.6381	2
FBgn0051118	1.46393	2.81778	5.66772	3.55589	4.20972	2.41508	3.60133	5.36598	7.62466	7.75899	6.14621	9.80817	2
FBgn0021764	3.15175	4.47053	10.9625	27.9727	33.4897	21.2645	23.0997	39.2595	46.0742	52.4469	49.1471	49.796	2
FBgn0039709	16.8857	7.85459	12.2392	26.3922	29.1554	21.0701	22.3729	36.2838	41.9473	44.1102	43.9163	41.1557	2
FBgn0052638	34.8708	20.4994	42.8315	29.9265	18.996	24.0806	21.2479	30.624	66.1486	59.9043	54.1945	66.9161	2
FBgn0035936	12.8596	16.4772	27.3105	24.0756	29.5259	27.7221	20.7	44.3475	51.1676	68.0739	54.3895	72.9996	2
FBgn0260993	1.21861	0.729639	1.29844	0.568559	0.624207	1.65556	0.864635	2.35351	2.79126	6.24425	3.10314	3.00808	2
FBgn0024841	133.166	113.663	169.91	107.587	88.2823	114.684	89.0044	86.1751	126.354	115.898	94.4306	106.999	2
FBgn0052699	14.544	5.69426	13.3837	12.6544	11.6559	15.3384	14.0039	11.8591	16.6778	19.8791	17.1307	19.9367	2
FBgn0038665	0.137291	0.627363	0.254424	1.88146	1.24251	2.46196	0.415138	4.03921	13.7264	15.801	4.24037	24.7191	2
FBgn0036847	17.7044	10.8602	21.9671	45.4295	43.5891	35.1561	49.2678	53.6788	69.5482	87.5495	63.2544	90.805	2
FBgn0033031	1.73158	3.11065	11.2657	1.04055	0.995845	6.00148	1.54852	1.5056	3.88451	4.29366	2.85721	5.62521	2
FBgn0000024	4.25816	4.82318	7.22786	1.6168	0.831531	3.76061	2.62021	4.54617	9.46847	15.0981	7.24527	13.7159	2
FBgn0085414	0.362376	0.92893	2.81652	0.747038	1.83335	1.41901	0.730721	1.13197	8.5352	13.2909	3.0571	12.8182	2
FBgn0032017	4.1	4.63638	7.99305	11.6615	11.0488	10.7568	12.2326	14.283	13.8593	12.5504	13.7354	15.9322	2
FBgn0032013	3.06809	1.73332	2.1419	1.09457	0.757694	5.64347	1.94903	0.966605	1.48988	3.47796	1.10332	3.49676	2
FBgn0004854	0.666793	0.82867	3.10618	9.21135	8.0468	6.69482	6.88185	24.6734	38.4159	24.0155	43.3726	45.9491	2
FBgn0001316	18.5372	17.9263	29.504	66.8732	67.5381	54.2043	60.2911	88.9488	95.1491	88.6449	100.233	96.7558	2
FBgn0033652	0.821389	1.09833	3.36064	1.34859	4.49516	1.86179	1.7594	5.79104	14.9231	14.781	10.4067	13.715	2
FBgn0032614	21.9496	7.20848	10.6004	0.65502	3.45707	8.16573	1.50009	1.15826	9.11245	8.88739	2.3237	18.3361	2
FBgn0243513	2.14358	1.48448	4.04077	7.85378	5.45299	8.03024	7.47667	4.79039	10.7953	11.8092	8.97451	9.19492	2
FBgn0030065	13.4295	16.5444	18.7505	13.851	10.7037	26.0768	18.9075	16.2777	18.8225	18.0704	19.9191	18.9859	2
FBgn0259166	9.39508	7.90802	11.8083	10.2596	7.64459	11.0123	8.93988	10.829	12.4043	12.2735	12.12	11.1632	2
FBgn0030607	8.80492	16.2195	7.81952	0.727375	0.695696	2.00468	1.14219	0.565868	1.27593	1.48333	1.01392	1.33753	2
FBgn0085405	16.8329	15.8854	21.5167	11.7107	12.0642	9.99983	11.7866	13.1463	15.433	15.7873	15.2994	15.2235	2
FBgn0011771	8.88928	10.1744	16.2407	31.4396	34.656	27.2193	31.4229	34.0342	36.62	40.0278	36.5024	36.876	2
FBgn0051176	10.5554	9.14336	6.45403	2.71503	1.84409	11.1106	3.65232	13.4849	14.7459	15.0855	22.723	25.0974	2
FBgn0033268	459.544	465.693	1544.53	71.3079	60.4653	649.5	103.919	138.956	225.779	834.141	290.355	422.106	2
FBgn0036529	1.98069	3.34036	4.81189	1.74096	2.75116	3.95212	3.21253	4.93599	4.96625	6.29771	6.89955	7.17757	2
FBgn0250867	0.000829277	0.425264	7.64073	19.912	23.4855	8.8504	14.4863	29.8687	34.128	40.7731	22.3037	49.3449	2
FBgn0036544	0.450606	0.592955	1.6559	0.747302	1.0633	1.34692	0.58279	5.67676	8.59298	8.45364	9.18217	13.9605	2
FBgn0013334	8.75403	7.98678	17.4758	15.372	12.6388	18.1379	15.1417	16.7266	21.6426	22.5047	17.5543	22.2563	2
FBgn0035953	4.7344	5.18815	8.92597	9.95691	9.28117	8.18216	9.52413	11.1498	11.178	11.6645	11.3163	10.3304	2
FBgn0003430	0.902133	1.05426	4.03796	12.8347	19.6551	8.21167	10.9732	16.2879	24.4749	24.8807	17.8955	36.6881	2
FBgn0001105	108.887	102.106	158.276	201.607	264.1	214.976	247.544	295.769	284.808	311.966	275.58	290.839	2
FBgn0037554	2.50999	3.76141	6.62181	8.43251	8.75169	7.49453	10.5197	13.1564	11.3826	15.5004	11.9902	12.2154	2
FBgn0030479	44.2874	23.4145	118.383	261.844	193.8	249.462	352.211	260.515	355.975	416.142	334.35	414.538	2
FBgn0030474	3.32972	3.53494	5.52505	9.01151	11.0613	8.01624	9.35435	12.0784	10.5707	12.9502	11.1993	13.899	2
FBgn0040649	0.28159	18.8208	15.9671	2.19966	3.51541	1.06486	1.57948	1.61649	3.93143	1.56431	2.64276	6.0196	2
FBgn0037409	0.633601	0.59077	0.838473	3.18339	3.49918	7.32833	8.17372	8.34781	7.94954	14.6769	15.9592	8.42577	2
FBgn0085384	3.35718	0.627605	5.58982	4.8938	3.08958	16.4903	3.97166	2.78871	18.5089	13.3965	8.70463	16.5768	2
FBgn0037028	1.89121	3.12287	6.63789	11.1926	9.05416	8.7462	9.51602	13.8558	12.875	14.873	11.9189	17.7442	2
FBgn0004167	33.2378	18.7235	16.8761	30.8429	26.5805	23.187	22.4059	34.4982	43.7304	47.9787	34.6177	39.0629	2
FBgn0263111	1.43531	1.66688	2.50652	1.65941	0.689631	1.49731	0.844907	1.94515	2.74585	5.79534	2.70763	4.20931	2
FBgn0038596	2.14598	1.508	7.7903	1.26816	0.75717	6.62777	2.1514	1.79377	5.79566	5.9112	3.24583	6.44917	2
FBgn0002643	8.01559	9.28353	34.4799	35.3917	43.7037	23.0804	19.6519	40.2945	88.6935	96.1223	44.9531	80.3119	2
FBgn0035104	2.84397	0.706378	0.675961	2.564	2.66179	2.33703	2.2821	4.84151	7.45129	9.28305	6.73632	9.58236	2
FBgn0029157	11.5689	13.2373	34.081	23.8978	22.9557	17.6739	20.2874	25.4513	30.1162	31.0359	28.8219	28.173	2
FBgn0259985	1.8462	3.12064	5.59372	9.90774	13.4366	10.7709	13.5046	13.6643	13.6295	14.4891	16.2925	17.8687	2
FBgn0030596	8.9514e-47	0.0996915	0.435442	0.669129	0.396772	0.0995833	0.46388	0.893602	0.797847	1.13953	0.78782	0.751898	2
FBgn0030594	30.7742	20.7574	15.8616	0.894331	0.808585	0.460195	0.9471	1.40548	1.48426	2.00444	1.3556	1.57224	2
FBgn0029846	0.947416	0.66501	1.37442	1.10769	0.143726	2.31062	0.877527	0.600745	1.91407	1.86293	0.199717	1.69657	2
FBgn0040987	1.20423	0.984274	0.668576	5.79588	0	0	3.24863	14.2216	9.72589	22.2018	7.46926	8.4978	2
FBgn0026393	2.5958	3.12312	2.85988	8.54487	11.0319	6.17075	8.90578	8.89664	9.37007	10.4678	10.7275	13.0476	2
FBgn0028984	43.7485	38.7983	69.4719	148.449	151.244	186.79	146.109	144.01	172.886	195.654	165.273	212.831	2
FBgn0014388	14.4409	10.7102	41.0519	58.8027	40.3719	33.9318	35.7629	50.6798	71.6509	53.3545	62.5047	67.8148	2
FBgn0041582	9.16385	5.88115	9.35255	7.76592	8.41095	7.90158	7.54107	8.90417	10.6348	11.9561	9.54772	9.60326	2
FBgn0034070	0.784927	1.03692	3.08201	1.511	1.54015	1.97051	1.03663	13.5862	33.5948	25.9034	21.8102	43.3456	2
FBgn0035976	12.0586	18.3017	28.8772	8.64327	9.19522	13.3175	5.06576	6.38189	17.4281	27.4889	9.19929	25.9015	2
FBgn0010408	1970.6	1307.12	1175.04	2220.48	2022.18	2102.76	2669.55	2596.73	2399.91	2452.5	2310.72	2674.66	2
FBgn0037824	2.99475	3.30547	9.68713	4.0813	4.95959	4.45665	6.8541	6.86612	6.49067	7.11557	7.07681	5.78824	2
FBgn0034022	3.64431	0.860408	1.20062	2.14791	2.49209	11.8646	2.45119	2.25824	5.07766	9.63654	3.01792	6.19533	2
FBgn0004618	0.170637	0.857028	2.81356	5.16558	5.03256	7.86253	10.2294	68.6647	90.5843	80.3146	122.779	125.985	2
FBgn0037469	19.3367	21.8207	30.8065	19.0861	20.5918	26.6029	20.6476	25.1863	23.127	30.1321	25.8668	31.2678	2
FBgn0046874	37.6537	35.7827	61.901	26.6513	26.5356	23.5958	19.0726	27.3571	33.0014	38.6455	31.661	34.4421	2
FBgn0035500	35.5126	30.8407	58.0411	52.9495	47.3438	46.3028	47.0582	56.1439	65.7906	68.7017	59.0203	63.9595	2
FBgn0034410	3.6699	5.60717	10.3159	11.2945	11.67	8.78823	11.6421	14.3763	13.1545	14.8872	15.0185	14.3012	2
FBgn0037375	5.56384	5.143	10.8243	0.525517	0.504545	1.65059	0.922731	1.69272	4.68926	6.18422	3.19336	8.16395	2
FBgn0037623	2.95735	4.34583	13.0463	12.049	8.55654	6.29601	6.32485	14.1261	15.6173	25.169	12.7203	20.9596	2
FBgn0025742	16.7745	13.7188	26.0119	34.2776	33.3642	28.6196	35.9936	41.4557	37.2015	41.6322	43.9367	39.6585	2
FBgn0039054	3.52599	2.63909	5.92603	1.63343	1.59164	4.54576	1.6377	4.87875	27.3189	32.3564	9.25618	39.831	2
FBgn0031268	14.4273	16.3983	28.012	84.8743	113.42	71.2812	92.1619	93.7507	102.841	101.662	109.218	126.198	2
FBgn0000273	59.8615	54.9143	55.2841	43.3421	36.9951	48.6531	43.7116	46.8589	45.6487	45.8807	45.2304	54.9224	2
FBgn0028671	22.3358	31.6421	46.0167	26.474	31.8612	25.8312	26.202	36.1714	37.8819	42.3102	39.9898	43.5018	2
FBgn0033229	4.4004	5.1339	5.52229	8.40617	7.71069	6.84921	8.6108	11.0787	10.662	10.945	9.84863	13.2815	2
FBgn0027932	34.3556	76.3669	258.605	499.683	606.888	371.33	493.877	607.08	676.346	663.681	719.777	756.638	2
FBgn0031554	1.48957	5.89374	12.3246	0.723225	1.41223	0.806883	1.23798	2.5992	2.06157	3.74087	1.10534	2.83298	2
FBgn0037697	39.6403	34.285	22.6863	7.45569	18.4542	16.9223	9.85857	43.6256	42.3815	68.9719	51.9584	118.198	2
FBgn0037696	10.8734	8.18263	6.41997	16.5023	16.7015	17.5487	16.7542	16.1457	16.353	18.2467	15.7249	24.0682	2
FBgn0040305	12.4494	11.8278	16.0393	9.86162	8.7627	8.4884	9.81422	13.7512	13.9637	12.954	15.6671	17.0956	2
FBgn0004592	0	859.906	1599.55	3.33895	0.236571	0.0159694	0	0.344732	1.40894	3.55052	3.57262	3.3177	2
FBgn0004595	2.1038	4.47328	21.2131	0.593285	1.49801	2.54225	0.7332	1.56595	5.81706	26.5505	2.78812	7.86908	2
FBgn0052354	1.14283	1.03867	3.3315	1.63985	2.95437	2.25199	1.8386	3.44385	5.61765	12.7517	3.97955	8.01553	2
FBgn0037848	9.76042	12.9181	25.5513	32.7021	38.5751	30.0778	32.5329	37.1759	37.0434	44.4019	38.4453	43.3975	2
FBgn0015589	4.45536	3.99594	8.89902	7.34433	7.26778	7.11752	7.48822	9.23831	10.3017	10.2548	10.5961	9.47383	2
FBgn0261873	11.984	10.9584	17.689	26.5108	28.6944	25.2029	27.0523	29.6844	33.5523	38.2026	31.749	33.205	2
FBgn0036341	15.6132	21.276	27.2332	20.3311	18.0435	19.8311	19.295	27.9476	29.9099	29.37	29.6522	31.0926	2
FBgn0030892	10.3208	12.5847	23.2712	29.3531	31.7273	22.009	26.8391	35.4287	39.3101	36.7706	38.5659	40.3658	2
FBgn0010105	1.32885	4.76117	7.50695	15.7338	33.6467	14.8419	17.6677	54.0863	47.5481	43.2604	82.7782	71.8655	2
FBgn0035132	10.1322	13.8578	17.4738	8.37506	8.71581	13.1589	10.038	12.9675	16.3946	14.4617	13.2172	20.8772	2
FBgn0051051	2.11551	2.24727	0.458455	0.958737	0.86975	2.92106	1.36999	1.38027	3.85321	6.65641	1.63361	9.05433	2
FBgn0051057	6.0888	6.86112	10.9353	2.52092	0.000584933	5.6183	2.90022	6.21158	15.2635	18.0887	8.87897	26.2693	2
FBgn0260935	2.81631	3.36896	6.89341	5.35539	4.40797	4.59222	4.60939	5.34853	5.8086	6.08088	6.18075	5.52005	2
FBgn0033960	0.961487	2.4066	5.23618	2.52732	1.76617	2.53238	2.83497	5.40884	6.09388	6.17427	7.29392	8.91074	2
FBgn0037060	0.949129	1.77198	4.59003	1.08938	3.23166	1.97165	1.44138	6.54874	5.82797	9.40624	4.30853	11.092	2
FBgn0053653	1.48917	1.97517	7.00265	2.71473	1.46656	5.76057	2.75389	4.77835	6.13276	7.79173	7.94421	13.7772	2
FBgn0050011	30.6182	32.7956	54.2514	41.1081	37.4841	34.699	35.5769	48.2058	48.2063	47.6535	49.2716	47.7806	2
FBgn0034266	5.41045	1.12259	1.30262	4.29504	4.1621	12.8132	6.67107	3.85926	13.4085	10.8174	15.9863	15.5357	2
FBgn0035521	1.97834	4.66239	8.60752	1.26533	0.915099	7.30982	2.19725	5.24946	13.7109	15.8677	5.13936	25.8097	2
FBgn0035520	16.629	10.4804	27.3731	38.6449	21.9186	31.8625	40.0304	37.6994	43.3941	47.1282	40.1293	39.1755	2
FBgn0036338	0.963559	4.19685	8.72585	1.24817	1.98779	1.48878	1.93965	2.00947	2.42399	1.99208	1.80853	2.03489	2
FBgn0036330	0.0466605	0.262619	1.01773	1.3883	2.19233	1.0806	1.40252	2.91756	3.40834	4.59024	4.08007	4.29526	2
FBgn0262718	11.144	13.1559	25.1073	20.9869	17.7913	20.3234	21.1595	30.8055	36.4721	31.1054	37.9804	33.9943	2
FBgn0040554	0.223969	0.681287	1.11288	1.16634	0.13383	3.22285	0.417107	1.95317	0.40031	2.12513	0.844363	2.35717	2
FBgn0031320	18.8901	13.8152	16.6016	36.791	32.3915	20.3265	30.799	46.9929	39.0167	39.7565	41.653	45.6305	2
FBgn0259239	0.153515	0.0603656	0.442678	0.55851	0.2142	0.523133	0.390206	0.626584	2.05155	0.619593	0.916235	3.10586	2
FBgn0029082	1.52762	2.00904	6.34038	9.18998	12.884	7.16931	6.86883	30.6296	44.9275	44.4221	49.963	54.1137	2
FBgn0016126	20.8962	48.6082	66.5298	43.4026	47.9878	41.2167	41.5406	48.2522	50.7063	49.6624	53.1345	61.05	2
FBgn0032264	6.18406	14.599	30.4487	1.37503	1.47056	2.93877	1.51153	2.51244	5.7662	7.49655	4.33783	8.10695	2
FBgn0036926	5.80437	3.58032	9.96516	10.4759	10.1001	18.2587	15.6745	13.8964	17.1275	27.2201	15.1692	38.75	2
FBgn0040367	1.25119	0.880752	3.30952	2.15605	6.03918	11.1146	4.7278	17.4246	18.3	14.2684	29.7493	22.6085	2
FBgn0004359	2.17554	4.58888	5.77715	11.9597	14.0006	8.36405	7.61618	18.3001	20.1228	22.7357	20.4265	26.7515	2
FBgn0003460	2.32774	2.28118	5.03184	6.62866	5.61693	23.4171	28.8612	38.5399	41.7162	39.7819	67.0729	53.6776	2
FBgn0263352	15.5927	17.024	32.3604	43.5111	44.5548	36.6758	38.2878	49.7924	61.1542	59.0324	55.2206	56.9889	2
FBgn0015609	1.46832	2.84685	8.23881	7.09139	7.36055	4.6239	3.80029	11.1764	23.2191	33.8541	12.2356	27.2656	2
FBgn0037265	2.45262	4.46478	7.69032	3.3775	3.38775	2.87068	3.22573	4.80753	4.4565	4.58837	4.08784	4.74132	2
FBgn0050380	4.55681	6.08012	10.8559	2.78112	5.69315	15.8327	7.18745	4.31595	10.7365	27.4085	6.99335	26.6546	2
FBgn0038220	19.6327	29.1402	46.7012	22.3448	30.0543	27.7335	25.2767	31.9888	33.5255	33.5134	35.798	32.2593	2
FBgn0005672	13.4674	20.3144	51.6471	121.179	145.992	120.361	157.15	161.533	185.802	185.954	187.553	236.447	2
FBgn0027594	10.4855	14.3884	27.7749	17.3895	20.8652	15.5977	15.5971	20.2806	25.9601	23.7637	25.6696	28.149	2
FBgn0038432	8.63548	6.78464	9.21057	10.4531	9.8799	14.6203	10.6469	11.9218	13.3917	11.9263	16.2195	15.6308	2
FBgn0031957	9.60441	0.666519	7.03634	3.36669	23.0231	52.4562	12.798	14.2097	35.16	67.7202	20.131	67.9723	2
FBgn0031488	1.92217	2.43629	5.87002	13.3891	13.7049	15.0802	13.5095	19.4753	25.4929	30.2315	24.5541	26.8958	2
FBgn0030571	8.30401	9.42819	13.7547	29.4105	28.8387	27.1573	26.5071	34.0136	30.0517	30.1489	29.799	33.029	2
FBgn0033884	3.57202	3.4835	7.49917	8.74832	8.53036	8.02603	7.9855	9.57137	10.7898	9.65163	10.6924	10.1554	2
FBgn0033885	0.0301886	0.98643	3.19001	0.635983	0.0469569	0.304475	0.503404	0.444356	1.25912	1.64693	0.939898	1.30503	2
FBgn0030680	3.11008	3.70856	8.54565	13.4295	14.7152	11.2286	13.9552	15.147	16.5098	14.4013	16.4872	16.0057	2
FBgn0040348	0.546189	0.601837	1.50221	1.59588	1.08873	1.2854	1.07765	2.90755	3.54478	3.95714	3.59123	4.06952	2
FBgn0051713	36.058	17.1556	30.6039	56.0927	40.7924	50.2565	44.4533	59.7166	81.7219	63.3815	87.7493	90.6696	2
FBgn0000363	5.37029	3.34192	7.24962	8.019	8.87706	11.1863	10.8985	27.3593	37.7131	53.5736	39.7315	69.42	2
FBgn0037742	2.51647	6.14789	19.983	8.13864	7.6568	7.65046	6.12731	8.2694	10.5838	13.2841	10.6768	10.2783	2
FBgn0037665	7.77983	2.59638	5.47746	2.23653	26.3666	3.47683	2.22552	19.4843	57.3861	110.769	35.5294	107.507	2
FBgn0038926	0.661387	0.474228	1.91426	0.517786	0.224386	1.20128	0.531576	1.64721	3.04168	3.79301	2.38128	4.10738	2
FBgn0030742	1.8443	1.79751	4.80132	1.43449	0.736661	3.93985	1.359	2.81559	7.4855	9.45927	3.91747	12.722	2
FBgn0031611	3.08641	2.79519	4.79582	5.48174	4.65565	4.57482	4.09899	7.27661	9.06695	7.23031	9.95413	8.81472	2
FBgn0034224	1.58955	1.68805	3.20912	2.82774	5.10563	4.88811	2.25334	9.76436	8.48608	8.69662	12.9069	11.8601	2
FBgn0016794	2.70996	3.5422	8.55956	11.9079	13.9703	13.1834	12.2403	16.0984	19.4024	21.2556	18.9503	18.7572	2
FBgn0262907	23.6212	26.5944	57.6392	64.0922	50.8766	59.6151	56.6511	88.359	89.9361	69.8612	99.9013	102.869	2
FBgn0000557	5.16165	14.2172	38.5802	3.63201	4.69824	10.5432	3.16931	8.92897	36.0676	66.7741	13.6538	72.2685	2
FBgn0037539	8.47451	10.9791	26.1165	18.6627	18.7942	17.7887	18.4861	21.3767	21.1163	22.249	23.2163	20.7611	2
FBgn0011300	9.76827	8.74146	16.9199	27.4438	27.4431	22.4107	26.0258	30.4742	35.5259	37.2396	26.5893	36.7335	2
FBgn0011305	18.4146	21.2719	55.9435	165.034	143.056	119.444	139.757	156.92	200.23	199.142	195.013	186.919	2
FBgn0050178	0.0140312	0.683382	2.5833	0.105552	0.623063	0.722828	1.25901	0.146051	0.407264	0.678499	0.89948	1.76984	2
FBgn0261815	0.115866	0.101952	0.726824	0.246494	1.14468	0.348902	0.0405386	1.11571	2.35099	3.44692	2.14727	5.1829	2
FBgn0035608	3.22199	11.2709	17.798	0.176662	0.644481	0.300782	0.0871617	1.43933	3.01886	5.27018	2.24297	7.77868	2
FBgn0051697	1.49514	3.35966	13.0537	0.0556923	0.773073	0.333751	0.433244	0.632195	1.47485	1.58036	0.803049	0.917882	2
FBgn0051690	0.192302	0.390976	1.67093	0.393758	0.52435	0.838798	0.369939	1.21249	4.57763	7.37978	2.05817	10.1593	2
FBgn0034135	0.506825	0.581735	1.33727	0.304985	0.708057	0.832622	0.484824	1.52162	2.86147	0.171461	2.43476	4.31201	2
FBgn0031429	0.646079	0.473745	1.80126	0.343618	0.91183	0.872983	0.753488	0.38883	1.25175	2.13559	1.33723	1.68025	2
FBgn0039479	1.90492	0.268401	0.804014	0.246284	3.79351	10.9302	1.73637	1.40917	5.96141	11.4484	2.4811	14.9627	2
FBgn0053481	0.556788	1.98929	3.07178	0.367693	0.510268	3.36282	1.03558	0.235561	3.78083	4.49557	1.85975	9.03391	2
FBgn0051619	0.970067	1.02217	2.59677	0.418651	0.785053	1.64822	0.610613	2.3341	9.68051	13.9872	3.34337	14.9702	2
FBgn0043550	0.0909916	0.171567	0.394114	0.26271	1.32088	0.150548	0.0341096	0.907477	4.17608	4.64043	2.79392	7.71246	2
FBgn0030174	0.661897	0.552883	1.4468	0.426462	0.85961	0.608898	0.67874	1.37271	3.45791	2.67614	2.57593	2.72952	2
FBgn0035258	0.0511194	0.317291	0.0754828	0.329948	0.575939	0	0.0672519	0.0951954	1.08496	1.08212	0.780884	1.07898	2
FBgn0085429	1.76568	1.19397	1.68751	0.307853	1.35732	1.11721	1.10148	3.38264	4.26536	4.60854	4.86149	4.77399	2
FBgn0032638	2.67277	34.839	144.727	0.164766	0.745631	0.0528015	0.370728	0.385773	0.123848	1.02833	0.865881	1.60413	2
FBgn0038828	1.87742	1.05965	2.29255	0.425767	0.668323	1.94658	1.34043	1.40047	3.52474	6.69744	2.25177	7.09792	2
FBgn0050009	0.870475	0.932993	3.56715	0.3146	1.27179	3.68233	0.373374	0.655781	4.65735	7.71234	2.20829	12.8427	2
FBgn0032428	0.299273	2.28685	4.74272	0.368601	0.755825	0.200669	0.320028	0.473978	0.416146	0.538463	0.932898	1.16338	2
FBgn0039900	0.152519	1.36517	2.7152	0.198372	0.707357	1.13248	0.427105	1.6919	1.18104	1.03669	0.897882	4.01906	2
FBgn0085481	4.98545	3.03528	1.51419	0.493641	0.721919	1.56837	0.965591	2.20956	1.53877	2.22854	2.41581	2.34297	2
FBgn0033799	0.398722	0.403767	0.647116	0.348787	0.593827	6.4366	1.04075	0.69849	1.2389	0.471825	0.479396	1.58238	2
FBgn0039808	0.333526	1.0136	5.35676	0.46515	0.500732	2.25048	0.43717	2.52649	7.54897	11.1547	5.50024	11.4984	2
FBgn0035677	3.02335e-204	1.87795e-304	1.84177	0.476904	0.77493	0.485319	0.462112	2.88538	5.30507	6.86538	3.77294	6.18674	2
FBgn0037754	0.581286	0.812893	1.59514	0.497945	0.574187	1.62847	0.816773	1.13061	2.43092	3.07308	1.71988	5.45726	2
FBgn0036591	0.0769747	0	0.0804765	0	0.760456	0.8915	0.538629	0.0926515	0.406734	0	1.54417	2.08194	2
FBgn0030249	0.590232	0.440756	1.61503	0.0224541	0.681727	0.382834	0.30405	2.82661	5.69989	7.18629	4.43503	6.46627	2
FBgn0035179	0.79379	1.5279	3.03804	0.331712	0.760398	1.28052	0.508339	2.34217	5.24713	6.0442	2.91382	9.37588	2
FBgn0036618	0.0391689	0	0.245705	0	0.773923	0	0.0342604	0.518607	4.80166	1.16524	0.523839	9.81988	2
FBgn0038522	0.367864	0.193347	0.624003	0.23703	0.548597	0.284492	1.65778e-29	5.67829	9.14281	14.6232	4.77296	12.168	2
FBgn0031476	0.130002	2.30958	8.64937	0.253788	0.621923	0.970627	0.767858	0.228253	0.507871	0.433837	0.779326	0.779551	2
FBgn0050101	23.3555	0.0436285	0.49061	0.196901	2.51809	25.7934	7.66636	3.23806	20.8254	48.1432	4.70258	42.6264	2
FBgn0263626	0.109062	0.199927	0.456093	0.270688	0.615687	0.252624	0.222587	0.437578	1.19098	1.0815	1.21548	1.28581	2
FBgn0051291	0.305982	0.236883	0.366483	0.275426	0.720271	0.40328	0.226173	1.76569	5.38971	12.3317	2.91565	6.28461	2
FBgn0064227	5.89782	2.00325	4.12261	0.433381	1.24787	5.88404	1.52058	1.74375	6.4476	3.51141	2.18737	10.1413	2
FBgn0085281	0.0289919	0.0744051	0.572742	0.256989	0.531922	0.111267	0.169058	0.288784	0.614951	0.339921	0.394783	1.20617	2
FBgn0263218	0.42161	0.946419	4.42098	0.320495	0.815455	0.860375	0.200833	2.38826	8.97326	11.2518	3.34945	13.0241	2
FBgn0004784	0.00841462	0.0832965	0.242106	0.322224	0.700672	0.33135	0.206084	5.39074	11.7677	13.4342	8.08824	20.3515	2
FBgn0032741	0.613562	1.33014	3.65429	0.406722	0.69024	0.597324	0.026265	1.54537	6.01424	8.56581	2.78035	12.3984	2
FBgn0262456	0	0	6.15851	0	9.54079	0	0	25.0896	40.6803	73.9956	6.99593	82.1662	2
FBgn0052187	1.52787	2.22294	4.89315	0.402111	0.689134	2.07966	0.509762	1.72528	3.09613	3.74868	3.06954	5.21061	2
FBgn0085250	0	0.189181	0.841569	0.403178	4.01286	1.3933	1.22412	2.4981	3.49933	6.16163	3.00358	7.71704	2
FBgn0262394	54.8679	30.7077	27.4509	2.25423e-09	9.49475	67.8779	9.10503	74.7732	57.0739	99.5663	22.6399	44.7013	2
FBgn0035815	1.76554	0.407915	2.3349	0.385886	1.09599	4.69591	1.29073	1.14297	1.15277	1.17686	1.26402	2.01609	2
FBgn0085335	0.379759	0.259011	0.694185	0.403437	0.63622	0.331107	0.421164	0.658285	0.96684	1.21771	0.722656	1.34016	2
FBgn0038282	0.557573	0.45521	1.3041	0.287374	0.00159996	1.43799	0.638536	1.4668	3.98133	5.7571	1.79009	6.37474	2
FBgn0024913	0.450465	0.389563	1.18139	0.225585	0.4183	1.33004	0.585584	2.2948	5.12644	4.70243	3.27229	10.7029	2
FBgn0038975	1.8959	0.983684	2.09094	0.445884	0.0885823	2.2348	0.847838	1.01863	2.69722	1.41062	2.07758	5.29867	2
FBgn0036780	6.56871	2.19781	0.792819	0.234093	0.0693405	28.77	4.55628	2.35905	1.44887	5.4619	2.73182	3.89899	2
FBgn0038343	0.710202	1.00433	0.795548	0.0539603	0.214785	1.17505	0.53246	0.488482	0.48249	0.503045	0.484599	1.05544	2
FBgn0262194	0	0	0	0	0	14.5225	22.0627	0	3.81483e-261	0	24.5275	709.322	2
FBgn0262636	0.704297	0.913997	2.24556	0.09971	0.0515431	1.61746	0.595665	0.188565	0.831104	0.176109	0.443035	0.818131	2
FBgn0034978	0.238973	1.19908	2.63535	0.494337	0.0566369	2.30283	0.948821	1.20168	3.76626	5.20312	1.09646	5.6369	2
FBgn0038676	0	0	8.43681e-206	0.161917	0.279253	1.80693	0.764038	2.86685	2.5007	3.80418	4.84311	3.0367	2
FBgn0037736	0.538897	0.509223	1.8835	0.359672	0.290793	1.17493	0.500569	1.66986	2.63126	3.71978	1.97371	4.24891	2
FBgn0030613	0.685417	0.591094	1.12426	0.186991	0.0677391	1.084	0.763768	0.428328	0.802457	1.21159	0.616245	1.23657	2
FBgn0035570	0	0.195515	1.40162	0.280555	0.402394	0.0645657	1.31672	0.539418	0.843332	0.664904	1.13875	1.9193	2
FBgn0036890	1.20841	1.00426	4.95616	0.380308	0.0373812	1.92242	0.515636	0.563718	2.42466	2.02679	1.81464	5.29914	2
FBgn0039530	0.321896	0.425392	0.990928	0.132038	0.14538	1.09292	0.897669	1.19485	0.721991	1.51161	0.66226	1.29015	2
FBgn0036935	0.378079	0.783091	1.35782	0.159098	0.105908	1.15295	0.67678	1.09805	1.07789	1.34121	1.51159	1.63828	2
FBgn0031811	1.41672	2.0822	0.678813	0.312531	0.392061	1.03006	0.920429	0.243381	0.886191	0.640587	0.245376	1.20577	2
FBgn0040351	0.999417	0.685347	1.93235	0.145824	0.238037	1.05302	0.782146	1.29962	2.56055	1.74916	2.05637	4.10113	2
FBgn0004242	6.37372	21.5425	31.6035	0.339822	0.100818	4.58069	1.36895	1.70642	6.55833	3.78854	3.24825	10.8453	2
FBgn0032810	9.22802	2.93158	1.50788	0.119696	0.185282	1.00363	0.710886	0.927365	1.18919	1.6738	0.695544	2.41468	2
FBgn0262974	0.000142769	0.000525907	0.00562566	0.00277994	0.00345795	0.00434298	0.634469	0.00441714	0.0453963	0.000511832	0.00578909	2.14783	2
FBgn0085421	3.18662	2.30955	2.74448	0.388888	0.302438	1.78389	0.749707	0.122788	1.97414	0.757271	0.553273	3.67587	2
FBgn0086062	0	0	0	0	0	24.3408	4.74358	0	15.952	5.63468e-124	0	20.7529	2
FBgn0052698	6.64589	22.4519	34.055	0.403792	0.275416	0.781274	0.62492	0.703069	1.17554	1.51664	0.638479	1.54687	2
FBgn0037130	2.46106	1.91289	4.08358	0.382988	0.337518	2.80837	1.418	0.604596	1.33893	1.64685	1.16632	1.87402	2
FBgn0033168	0.613446	4.57471	17.5368	0.377035	0.204859	0.183803	0.784546	2.25118	0.876833	2.36312	1.55173	2.31148	2
FBgn0034328	0	0.740412	0.241967	0.14321	0.380025	0.623716	0.529929	1.2154	0.711403	1.33508	0.835979	0.980391	2
FBgn0085323	0.599301	0.851423	1.46206	0.398424	0.000331536	0.665173	0.633408	0.60113	2.63892	3.21907	1.3189	3.99983	2
FBgn0033798	1.52697	5.94775	11.0356	0.420827	0.344093	0.555587	0.516183	1.18695	2.16763e-61	1.12066	0.736642	3.33507	2
FBgn0037798	1.03182	2.70074	8.39956	0.339895	0.111152	1.94504	0.515702	1.0051	1.60817	1.36736	0.486091	5.57481	2
FBgn0024941	0.855155	0.841775	1.72239	0.443575	0.256333	1.2387	0.546807	0.890082	1.55475	2.77503	1.00895	3.33665	2
FBgn0033983	0.652477	3.99642	5.0574	0.372356	0.338333	2.17984	0.905289	0.760413	2.30409	2.45501	2.09494	3.63107	2
FBgn0033793	1.37209	2.02031	6.54783	0.258942	0.2811	1.15339	0.600072	0.665939	2.47907	3.51126	1.45871	3.84463	2
FBgn0016975	1.33801	0.917913	2.19117	0.389839	0.331032	2.24316	0.572977	0.743867	2.51745	4.24001	1.52827	4.23545	2
FBgn0034720	0.840231	0.922681	2.37936	0.467336	0.117012	2.17207	1.00234	1.94719	2.11849	2.96904	2.56604	2.65368	2
FBgn0052639	0.27586	0.559093	4.37052	0.0301238	0.279601	0.307892	0.696909	0.277185	0.955426	0.949375	0.326215	0.883949	2
FBgn0261041	0.57828	0.815175	1.46201	0.164239	0.264594	1.70621	0.845384	0.800049	1.57005	0.356876	0.784202	2.56527	2
FBgn0028572	8.97538	9.57253	17.2055	0.389443	0.475524	1.76474	0.818837	6.90345	9.82655	5.09551	15.0422	17.3091	2
FBgn0033249	0.988157	1.08183	2.88213	0.41487	0.0682696	1.60668	0.564143	0.599854	1.6046	2.71819	0.462091	1.5468	2
FBgn0034417	8.83915	5.45301	3.87511	0.0227742	0.0020242	3.24623	2.31433	2.63601	4.19013	6.37132	3.65413	7.78515	2
FBgn0035505	0.879072	0.510096	1.21705	0.300285	0.390901	1.437	0.578168	1.48011	1.91012	0.825788	1.80328	3.06106	2
FBgn0262476	0.433749	1.14524	1.29795	0.313547	0.0449789	3.09691	0.959573	0.860674	0.957681	2.08277	1.03112	1.80123	2
FBgn0262397	0	0	0	0	0	4.48806	11.6957	0	7.6016	0	0	17.9103	2
FBgn0083974	0.174625	0.444494	0.15139	0.386818	0.0557404	0.160321	0.550925	0.319058	0.834776	0.458785	0.0962123	1.5004	2
FBgn0030559	0.98381	0.764059	1.15041	0.486889	0.0526508	0.915408	0.506625	0.798455	2.19667	0.895736	0.605535	3.1386	2
FBgn0010258	2.47538	5.18208	9.5478	0.262552	0.41771	0.453877	0.685511	0.654372	0.661587	0.537278	0.428059	0.594288	2
FBgn0038693	0.580483	0.498945	0.982427	0.328069	0.348349	0.821437	0.420583	0.836904	0.970849	0.918789	0.796155	1.05368	2
FBgn0038247	4.52375e-05	0.0915339	0.195122	0.00887308	0.170614	0.0319236	0.205108	1.3713	5.85771	0.845583	6.41971	9.78607	2
FBgn0051226	0.636358	129.303	129.431	0	0.00156463	0.0513862	0	0.919388	0.583124	0.833112	4.48485e-32	1.67976	2
FBgn0030723	0.430745	0.498341	0.585971	0.296269	0.237744	1.15835	0.391186	1.11108	2.68917	2.04437	2.47942	5.9778	2
FBgn0035855	0.157793	1.42315	7.06077	0.453181	0.356316	0.493429	0.483067	0.740724	0.900478	0.625893	0.542648	1.36243	2
FBgn0037950	0.0359696	0.168015	0.314315	0.327052	0.222637	0.447453	0.224492	2.58974	9.46671	3.37409	3.67466	5.76705	2
FBgn0037666	0	0.0207821	0.0790172	0.0401968	0.373333	0.153183	0	0.545829	1.47763	3.55998	0.667838	2.33903	2
FBgn0032519	0.0284179	3.71953	12.835	0.211597	0.40107	0.164564	0.14914	0.923549	1.53163	4.50884	0.760114	5.32123	2
FBgn0262483	0.898435	0.348622	1.27699	0.158185	0.0493518	0.977613	0.296354	0.861248	1.35291	2.56989	1.31638	2.50055	2
FBgn0053179	0.154209	0.60322	1.61094	0.184805	0.324898	0.429521	0.393348	0.828154	1.05698	1.75657	1.28758	1.88014	2
FBgn0042110	1.4604	0.393202	0.320362	0.0905393	0.192205	0.374605	0.0396183	0.737656	1.90983	2.02573	1.08956	2.29551	2
FBgn0052406	0.327099	0.173652	0.696391	0.236046	0.0873847	0.680474	0.0790207	1.40795	1.83258	1.54125	2.06952	1.55855	2
FBgn0031463	0.682043	3.96272	10.7801	0.437364	0.200102	0.940538	0.36249	0.862174	1.77809	1.91662	1.50766	4.2745	2
FBgn0037107	0.287479	0.536936	1.792	0.311562	0.237312	0.648379	0.260942	1.16866	2.74573	3.17348	1.77389	5.24879	2
FBgn0010197	0.0420021	0.10708	0.45983	0.0907733	0.120502	0.0531477	0.00500197	1.07602	3.21241	1.96352	1.47528	4.26851	2
FBgn0053723	0.009979	0.0880472	0.285391	1.16091e-52	1.14376e-47	0.0817619	0.491838	0.511258	0.363638	0.462361	0.869659	0.846563	2
FBgn0034788	0.345657	0.294432	1.75835	0.230219	0.103597	1.01793	0.461567	6.76245	9.16309	8.71007	10.0905	15.0642	2
FBgn0259823	0.293103	0.461162	1.57583	0.206339	0.359941	0.687874	0.344164	1.26796	2.04996	3.26738	2.0759	3.63795	2
FBgn0038694	0.317364	6.95638	27.0892	0.192903	0.191959	0	0	0.709426	1.00617	0.89917	1.06109	2.71191	2
FBgn0053007	0.154635	0.242863	1.03539	0.107087	0.367431	0.618516	0.0896194	1.27039	1.93192	1.56612	0.476569	0.912708	2
FBgn0020248	0.105748	0.455035	0.997211	0.117626	0.00695146	0.186649	0.0273817	0.594953	1.64401	0.141082	1.5372	2.61567	2
FBgn0031762	1.46841	1.74093	4.48202	0.335845	0.446203	1.48218	0.474734	0.89213	1.6462	2.67108	1.27625	2.68093	2
FBgn0003996	0.00814167	0.160441	0.527771	0.0326788	0.13518	0.058177	0.0392732	0.612288	1.39229	1.65557	0.619432	1.93177	2
FBgn0260461	0.380754	8.98901	24.3077	0.206596	0.217472	2.35608	0.149271	4.42669	0.461055	14.8722	3.03632	4.6273	2
FBgn0053136	0.224579	3.37584	12.2094	0.00697884	0.211304	0.130051	0	0.585688	0.467949	0	0.0717477	0.58406	2
FBgn0052544	0.632419	0.832596	1.70656	0.456492	0.228395	1.15411	0.458569	1.60621	3.41534	4.90137	1.08209	4.90175	2
FBgn0029105	0.521343	0.63014	1.03024	0.319568	0.0604491	0.656586	0.268892	0.574078	1.90746	2.31096	0.850072	3.32318	2
FBgn0000206	0.00548157	0.0346369	0.230467	0.00611338	0.0183498	0.0349609	0.035698	1.93314	3.05509	2.81051	2.99625	4.08994	2
FBgn0085460	0.0672912	0.0802059	0.0541633	0.000517951	0.0907113	0.0102117	0.103647	0.61675	0.22286	0.346356	0.00108485	0.545545	2
FBgn0004841	0.0462101	0.126455	0.332071	0.0463667	0.185726	0.128483	0.0344859	0.712089	0.982017	1.328	1.18475	1.53775	2
FBgn0029834	0.397247	0.36257	0.838073	0.167	0.169329	0.612757	0.303653	0.821903	1.82954	2.19397	1.27655	2.61612	2
FBgn0086677	0.57983	0.556673	1.45764	0.358111	0.464069	1.15187	0.447522	0.924627	8.92845	15.0082	1.76018	17.1658	2
FBgn0039255	0.0127775	0.0281807	0.281263	0.0136268	0.307361	0.118696	0.0224106	1.26442	5.57522	7.62213	1.8479	9.91655	2
FBgn0038612	1.75877	4.73452	10.2875	0.223521	0.110148	0.225228	0.266222	0.919852	0.843798	0.712604	1.05623	1.33353	2
FBgn0085448	0.066843	0.00710353	8.29599e-115	0.0857499	0.054165	0.09087	0	1.55677	4.25878	3.11981	3.79237	5.67525	2
FBgn0039064	0.90857	1.5673	1.93404	0.305822	0.342297	0.949748	0.361823	0.70679	1.16396	1.84347	0.834697	1.91016	2
FBgn0259935	0.408075	0.313448	2.48628	0.304464	0.103988	0.683706	0.321522	1.46117	3.29298	3.98433	5.67166	5.14425	2
FBgn0031920	0.0296555	3.871	10.3755	0.242576	0.230186	0.297882	0.393801	0.636133	0.512499	0.922319	0.496732	0.700483	2
FBgn0050419	0.495514	0.460168	0.981222	0.268388	0.334327	0.88245	0.211877	1.92548	3.41251	3.52498	2.8462	5.65016	2
FBgn0039028	0	0.0378114	0.107824	0	0.145553	0	0	0.634474	2.43411	0.454532	1.08372	3.44506	2
FBgn0263344	0.022966	0.0431302	0.434454	0.159524	0.310047	0.197655	0.190208	0.542908	0.811232	0.242826	0.723672	1.80755	2
FBgn0086782	0.155508	0.085907	0.426847	0.458324	0.425559	0.355678	0.40055	0.683597	0.577723	0.464601	0.361981	0.743621	2
FBgn0003710	0.429325	0.380345	0.772599	0.364956	0.152127	0.579018	0.413718	1.42324	1.46814	0.840674	2.25441	2.21443	2
FBgn0259241	0.686167	0.738366	1.2991	0.425498	0.459465	1.04022	0.251281	2.79127	3.84817	2.62799	4.4128	7.17961	2
FBgn0040357	0.0360577	0	0.0376981	0.0767094	0.101779	0	0	0.737822	0.647797	0.357562	1.10224	0.900238	2
FBgn0032879	0.199101	0.396557	0.483334	0.323568	0.281973	0.44008	0.352885	0.696997	2.3042	2.09607	0.898627	3.08582	2
FBgn0040726	0.379395	0.590342	1.65389	0.279378	0.413267	0.754475	0.231705	0.831325	2.16605	2.23966	1.48208	3.06319	2
FBgn0035903	0.536774	0.821577	2.12098	0.453909	0.402664	1.33489	0.404186	1.10085	3.43948	3.70124	1.93681	5.27796	2
FBgn0004052	0.294665	5.51771	9.68178	0.343553	0	0.310964	0.387615	2.61613	5.05423	1.97958	3.23064	7.12915	2
FBgn0030248	0.546211	0.73898	1.95777	0.040534	0.498611	0.59324	0.229947	3.82975	6.04856	7.53532	5.79839	8.98236	2
FBgn0033447	0.36467	1.09305	2.25784	0.095032	0.335163	0.279697	0.162902	0.741084	1.13268	1.20712	1.27808	1.61149	2
FBgn0262891	0	0.504478	2.30173	0.292728	0.194197	0.159363	0.160474	0.993732	0.872483	0.909652	1.57733	4.05564	2
FBgn0033657	0.300316	0.218694	0.39865	0.163404	0.0860593	0.682633	0.384894	0.581471	0.599484	0.614518	0.930766	1.24073	2
FBgn0035171	0.325954	0.161489	0.437434	0.068155	0.0293132	0.492068	0.175859	0.509353	0.663534	0.621538	0.689924	0.874736	2
FBgn0033815	0.320185	1.03579	2.18573	0.160274	0.239234	0.43627	0.31301	0.906811	1.73433	2.98831	1.24145	3.48755	2
FBgn0069969	0.00246467	0.151378	0.596487	0.01964	0.0232416	2.03166	0.131107	0.729434	0.41447	0.213443	0.136107	0.987575	2
FBgn0037908	0.262962	0.176928	0.300646	0.0546751	0.0815323	0.28226	0.128672	0.975338	1.28596	1.59968	1.12331	1.98056	2
FBgn0085420	0.0688673	0.451228	1.42032	0.17576	0.0595528	0.229494	0.0938635	1.08858	2.6146	2.22683	2.03337	4.23527	2
FBgn0262213	0	0.403924	2.20935	0.260579	0	0	0.325869	1.80899	40.1718	0	0.0142822	16.7064	2
FBgn0263072	1.00274	1.03335	3.48434	0.188406	0.119153	0.445229	0.146516	0.78482	1.97504	3.30718	1.46192	2.58886	2
FBgn0025833	0.326118	0.00738158	0.0461728	0.00829926	0.0778295	0.285145	0.227234	0.5256	0.929848	0.358619	0.0780434	2.22771	2
FBgn0031697	0.341076	0.41002	1.645	0.155627	0.299336	0.892493	0.295914	0.565573	1.22978	1.78988	0.610328	0.925608	2
FBgn0262286	0	11.2342	59.8737	0	0	10.7342	0	48.9299	52.1626	100.471	27.3817	358.692	2
FBgn0034136	0.11908	0.188944	0.307667	0.409332	0.148626	0.735768	0.294526	1.05285	1.16204	1.90429	1.08077	2.23958	2
FBgn0028906	0.573548	0.536103	1.93957	0.154723	0.123025	0.747002	0.115383	0.934024	3.16285	2.97344	1.59939	4.01248	2
FBgn0011279	0.134303	0.252665	0.0473021	2.98548e-110	0.439548	0.659421	0.224744	0.592347	1.32412	0.707719	0.913839	1.14125	2
FBgn0039282	0.230978	0.0801226	0.786276	0.14576	0.153288	0.441408	0.0356521	0.63604	1.62422	0.109427	0.981887	2.52945	2
FBgn0260995	0.137167	0.0095522	1.88776	0.0487456	0.00539217	0.0310214	0.0451266	0.656639	0.144817	0.185697	0.479232	1.11686	2
FBgn0028888	0.170932	0.201684	0.490383	0.119156	0.168995	0.323133	0.0955011	0.678625	1.94965	2.13809	1.40565	3.40668	2
FBgn0031490	0.175345	0.22754	0.900567	0.312672	0.399134	0.606917	0.113121	0.774587	2.58308	4.08507	1.53799	4.71887	2
FBgn0015400	0.380445	0.461095	1.4718	0.26746	0.482087	1.06849	0.391354	0.641314	1.69368	2.34882	0.900425	2.37136	2
FBgn0052006	0.118821	0.182967	1.56551	0.0795354	0.298985	0.454131	0.121821	0.766778	0.893866	1.41393	1.40344	2.34238	2
FBgn0259145	0.537271	0.682931	0.937877	0.180942	0.00330026	0.786866	0.148805	1.15845	0.881826	0.131515	0.397084	1.64261	2
FBgn0041097	0.502123	0.781948	2.37077	0.253623	0.316656	0.6962	0.173791	1.66484	4.60089	6.9608	2.80612	7.71873	2
FBgn0263456	4.37394	4.22645	5.43266	0.276063	0.157011	2.09292	0.234831	0.581749	0.924211	0.184944	0.636435	1.48411	2
FBgn0035768	0.173572	0.684096	3.62937	0.230787	0.0816558	0.435557	0.240383	0.574536	0.458577	0.860603	0.497428	0.43636	2
FBgn0030600	0.984305	1.86376	2.81634	0.246241	0.298794	0.540958	0.330979	1.17598	1.53126	1.04296	1.89263	2.27508	2
FBgn0032627	0.230926	0.193416	0.852716	0.267215	0.395458	0.366116	0.118524	2.2261	3.40235	1.76098	3.27898	4.39343	2
FBgn0030597	0.698373	4.90525	6.1433	0.256354	0.249369	1.45592e-74	0.0648889	0.668103	0.509511	1.0097	0.529452	0.682606	2
FBgn0083942	0.200049	0.990144	2.9281	0.265991	0.494086	0.695073	0	1.20396	2.43123	1.98376	2.10212	4.78643	2
FBgn0083949	0.348513	0.267808	0.918554	0.124719	0.0815266	0.470739	0.259448	0.820344	1.29555	1.41246	1.7044	1.57974	2
FBgn0054007	0	0.439403	1.87952	0	0.28191	0.462686	0	1.20215	6.33281	5.94234	2.86222	10.8884	2
FBgn0250908	0.543279	0.44097	0.981047	0.460871	0.233051	1.10994	0.48063	0.6147	1.6995	2.04723	0.545642	1.5229	2
FBgn0261086	0.251324	0.383929	1.28254	0.452982	0.315289	0.493213	0.325807	0.80669	1.07715	1.52302	0.880306	1.42343	2
FBgn0039718	1.22346	1.96579	0.726643	2.2759e-239	0.382038	1.86464	0.355897	0.723879	1.54058	3.35744	1.47588	4.91426	2
FBgn0037849	0.688098	0.819161	1.2776	0.251588	0.148526	0.815688	0.233667	0.876957	2.7034	3.85324	2.36271	4.74962	2
FBgn0085304	0.00497905	0.0979356	0.176484	0.0126253	0.242046	0.06996	0.103844	0.57719	2.04598	0.039735	0.938571	1.8033	2
FBgn0035481	0.738512	1.89811	7.38881	0.264576	0.162342	1.12124	0.347044	0.993807	2.37836	3.9997	1.6858	4.35825	2
FBgn0259236	7.31954	11.7529	15.1209	0.107043	0.204228	0.467893	0.112063	0.952168	0.159775	0.507951	0.524209	0.621721	2
FBgn0053988	0.739742	0.390706	1.43703	0.273423	0.0399941	0.978467	0.480195	0.772046	1.16275	0.13392	1.0748	2.18363	2
FBgn0035648	0.0722226	0.117385	0.223818	0.151364	0.0349904	0.318449	0.114095	1.82226	4.33072	4.19991	2.56697	6.65704	2
FBgn0262401	0	0	0	0	0	0	0	8.55766	14.5584	71.554	6.58309	36.4621	2
FBgn0263575	0	0	0	0	0	0	0	58.5001	52.8963	0	0	48.9655	2
FBgn0031955	0.183465	0.234237	0.75847	0.175352	0.116504	0.512074	0.133702	1.5277	2.08924	2.3629	2.44218	3.22513	2
FBgn0033628	0.248134	0.198327	0.588483	0.053997	0.0731855	0.158765	0.00743078	0.638276	1.8231	1.41739	1.04279	1.78395	2
FBgn0260793	0.305818	0.414525	1.78723	0.179387	0.259916	0.642773	0.25857	0.659171	3.73185	7.11989	1.22414	6.82208	2
FBgn0028862	0.719118	0.329537	1.04683	0.0960414	0.0632117	0.758497	0.32104	0.47951	1.81375	2.18213	0.970317	1.78065	2
FBgn0028863	0.151573	0.278152	0.511572	0.0407806	0.100016	0.653411	0.22157	0.103694	1.53251	2.14817	0.148203	1.9809	2
FBgn0032470	0.0770173	0.0741219	0.161042	0.0512022	0.190219	0.00708759	0.134732	0.289696	0.580582	0.381866	0.485685	0.352891	2
FBgn0003515	6.88225	2.29505	1.10328	0.329539	0.148941	0.126637	0.20722	0.164514	2.04997	2.98177	0.382991	3.70623	2
FBgn0036962	0.0637437	2.09853	8.80093	0.0836433	0.139945	0.0561686	0.040431	0.348887	1.06498	0.524876	0.341891	0.990204	2
FBgn0037766	0.327008	0.13825	0.35194	0.100371	0.0559589	0.456012	0.209588	0.372551	0.510988	0.80443	0.61524	0.729444	2
FBgn0053679	0.78286	0.131084	0.262735	0.253579	0.131962	0.22224	0.175299	0.237356	0.542184	0.547655	0.303105	0.446822	2
FBgn0028412	0.462491	9.05355	39.1643	0.300069	0.218569	0.385503	0.152491	0.263949	0.504457	1.41929	0.328077	1.38034	2
FBgn0003720	0.367141	0.459901	2.10048	0.119328	0.273472	1.29926	0.187328	0.343711	2.11241	3.43845	1.59773	4.01024	2
FBgn0034437	24.4191	9.1957	11.5278	0.0473477	0.107721	0.215435	0.126229	0.255851	0.79495	0.663991	0.511558	1.43311	2
FBgn0038725	0.152411	0.167235	4.57272	0.0755338	0.475961	1.00407	0.182446	0.131857	1.44806	0.132962	0.527255	1.24315	2
FBgn0038098	62.638	42.3374	14.6899	0.056584	0.111394	0.160469	0.249833	0.48823	0.738707	0.58142	2.20834	1.53858	2
FBgn0030399	0.236345	0.401746	1.54997	0	0.040066	0.422881	0.16914	0.491872	0.865928	1.64768	0.921844	0.907097	2
FBgn0034154	0.52717	0.000130536	0.792078	0.491854	0.000200745	0.759269	0.000131789	0.00710939	6.25733	0.000758471	5.44754	4.09498	2
FBgn0029962	0.375824	0.299678	0.992354	0.107857	0.0923706	0.658653	0.27888	0.10986	0.694995	0.44295	0.214376	1.777	2
FBgn0050361	0.411711	0.344287	0.797947	0.132447	0.114295	0.701371	0.17815	0.158838	0.674831	1.49847	0.117741	1.27747	2
FBgn0050098	0	0.0320805	1.52469	0.155125	0.205821	0	0	0	0.647295	1.15692	0.195037	1.27435	2
FBgn0262315	0	0	6.19304	0	0	0	0.245377	0	2.46978	0	0	1.09326	2
FBgn0028370	0.0160795	0.0295393	0.474082	0.0862642	0.066599	0.221054	0.0303273	0.0475141	1.09827	0.340776	0.371015	1.29449	2
FBgn0261514	0.132468	0.305971	1.64116	0.0140907	0.373912	0.12166	0.0227514	0.247143	2.87041	5.18209	0.759457	4.97312	2
FBgn0052407	63.9481	21.7947	5.41885	0.387683	0.212653	0.64568	0.329484	0.217635	0.891707	0.747077	0.503778	0.987485	2
FBgn0002962	0.102213	0.0888852	0.417605	0.0984619	0.118874	0.16616	0.0509582	0.0407757	0.934462	0.301335	0.0577102	0.898781	2
FBgn0031858	0.398588	1.72506	9.34742	0.170516	0.172836	0.218453	0.0995323	0.204385	0.841883	1.05284	0.225323	1.27985	2
FBgn0013973	0.149232	0.228555	0.929667	0.0538481	0.0585354	0.622942	0.07819	0.466551	0.978844	0.0805137	0.411213	1.21377	2
FBgn0003386	2.11216	1.36474	2.91589	0.0635519	0.00193229	0.835543	0.0792293	0.0613525	0.632492	0.0271393	0.465327	0.945257	2
FBgn0014179	0.165023	0.785946	1.95861	0.109451	0.136268	0.294812	0.0310058	0.178472	0.658605	1.13154	0.410865	1.43358	2
FBgn0030193	0.0379665	0.254408	0.325481	0.0190295	0.0287056	0.0636267	0.0496068	0.212204	0.689056	1.33353	0.469423	1.43128	2
FBgn0030192	0.0772723	0.340469	0.415247	0.107986	0.246627	0.151589	0.0778663	0.197046	1.43395	1.35864	0.526525	2.04792	2
FBgn0086778	0.690715	0.704223	2.40553	0.277769	0.277316	0.992647	0.279445	0.295274	1.13033	2.66171	0.420388	2.15425	2
FBgn0033054	0.314599	0.324604	0.534407	0.426794	0.0614275	1.41937	0.157019	0.0838464	0.527115	1.53318	0.0523879	1.65555	2
FBgn0052600	0.363281	0.309868	0.81385	0.256301	0.0526538	0.725416	0.28209	0.0558768	1.05349	0.00200608	0.446185	2.11696	2
FBgn0015946	0.130353	0.260681	1.02832	0.100842	0.050174	0.425466	0.0621917	0.370858	0.601122	0.705073	0.633937	0.751982	2
FBgn0030359	0.113641	1.35877	4.87734	0.306105	0.255548	0.29809	0.193022	0.376095	0.547129	1.30373	0.533089	0.869312	2
FBgn0030358	0.335534	0.227943	0.82025	0.0997245	0.104459	0.422895	0.182707	0.297634	0.773114	0.880751	0.424228	1.04714	2
FBgn0259150	0.650292	0.490244	1.44263	0.0471842	0.101101	0.662409	0.120006	0.192389	0.511958	0.886001	0.237113	0.832976	2
FBgn0034950	0.247531	0.18898	0.548393	0.100305	0.0914958	0.25938	0.113411	0.446916	1.12362	1.75329	0.534851	1.6247	2
FBgn0052206	0.309853	0.260769	0.645152	0.106107	0.106544	0.568252	0.205444	0.376106	1.41208	1.85886	0.464022	2.40442	2
FBgn0035086	0.138132	0.636243	1.49911	0.0121542	0.0890614	0.458818	0.205454	0.00221101	0.859546	1.2863	0.379397	1.6789	2
FBgn0029839	0.417264	0.204209	0.484981	0.0354162	0.205967	0.655808	0.487403	0.324374	0.84295	0.359647	0.485319	1.09209	2
FBgn0083950	0.277949	0.429102	1.06004	0.149741	0.155774	0.625248	0.197836	0.261764	1.16651	2.67047	0.363133	1.84446	2
FBgn0031064	0.627392	0.436455	1.49717	0.243712	0.117406	0.767379	0.208412	0.497378	1.65199	2.71062	0.789479	2.23569	2
FBgn0028481	0.0810468	0.0690507	2.16382	0.329769	0.028766	1.34872	0.110105	0.118745	1.71134	0.322425	0.529617	1.82013	2
FBgn0031923	0.698607	1.18205	1.91924	0.103282	0	0.730145	0.406129	0	0.687657	1.38553	1.01352	0.878647	2
FBgn0261090	0.577119	0.533533	1.11792	0.28627	0.302281	1.03666	0.414908	0.233834	1.26406	1.51686	0.399689	2.37956	2
FBgn0054034	0.488396	0.716243	1.23398	0.0865846	0.0574406	0.471372	0.106798	0.34292	1.03227	1.21078	1.01086	2.92138	2
FBgn0035676	0	0	8.12695e-13	0.0516475	8.60487e-90	1.60205e-116	3.15422e-56	0.46818	0.828502	0.956988	0.629639	1.23588	2
FBgn0028879	0.187174	0.264738	0.463764	0.149697	0.110417	0.340599	0.226946	0.0843795	0.587844	0.169987	0.383695	1.27902	2
FBgn0032462	0.0273638	0.0300972	0.286086	0.37839	0.424812	0.0316919	0	0.29643	1.30131	0.814048	0.705778	1.33789	2
FBgn0039005	0.0829986	0.0836055	0.118324	0.0331166	0.11051	0.0558933	0.0726105	0.466903	2.08238	1.58178	1.15686	3.41415	2
FBgn0261572	0.167767	0.201118	1.03038	0.0317821	0.112963	0.0838099	0	0.22471	1.4202	1.79799	0.484986	2.14904	2
FBgn0262477	0.255682	0.529562	1.95066	0.111075	0.166543	0.666109	0.214092	0.454917	1.08133	2.07771	0.585457	2.04566	2
FBgn0033770	1.21692	8.99561	11.9048	0	0	0.172392	0.0328764	0.135745	0.93759	0.745658	1.34036	2.11999	2
FBgn0050355	0.38958	1.85969	11.1972	0.0883815	8.49747e-33	0.231535	0.105284	0.383314	0.638889	0	6.42248e-29	0.473146	2
FBgn0036360	0.265292	0.467616	1.14245	0.07268	0.195629	0.493958	0.025505	0.210176	0.674711	2.27631	0.325963	1.06886	2
FBgn0033500	0.130146	0.199877	0.285302	0.131863	0.0448119	0.364308	0.0623976	0.294556	0.811189	0.863592	0.470398	0.851908	2
FBgn0031906	2.69308	0.476055	1.45123	0.116368	0	3.50182	0.00817424	0.132744	1.00671	0.180806	0.237213	0.701632	2
FBgn0037191	0.233336	5.00456	15.7958	0.43435	0.246985	0.135121	0.408191	0.24575	0.678119	0.578461	0.250762	0.819224	2
FBgn0036380	0	0.034856	0.375497	0.0112364	0.29817	0.0367029	0.0184794	0.139863	0.535845	1.04751	0.302731	1.09263	2
FBgn0032719	0.660727	0.762066	1.42449	0.170987	0.0818696	1.34875	0.341707	0.438428	1.71432	2.93088	0.616782	3.53475	2
FBgn0040391	0.0097816	1.33696	3.06646	0.0484961	0.0989816	0.0531231	0.122204	0.418269	0.809697	1.53336	0.480744	1.36242	2
FBgn0259099	0.356997	0.173534	0.478767	0.109958	0.240246	0.250547	0.119184	0.28835	0.716954	1.09077	0.358326	0.928646	2
FBgn0032506	0.268593	0.380379	1.17435	0.0763352	0.0707921	0.412505	0.125404	0.353681	1.33686	1.74133	0.512395	1.97907	2
FBgn0263649	0.000270105	0.00826966	0.553781	0.0420607	0.0767523	3.83765e-41	0.0115355	0.261359	0.652859	0.966327	0.567014	0.818914	2
FBgn0013948	0.0758586	0.282001	3.03953	0.198195	0.424641	0.0708109	0.132512	0.280204	2.9684	7.40577	0.226445	4.82349	2
FBgn0263079	0.0145775	0.0641347	0.281708	0.0542714	0.205955	0.0253248	0.0637539	0.179313	1.13394	1.15744	0.822768	1.37864	2
FBgn0259972	0	0	0	0	0	0	0.456374	0	0.73519	0	0.166141	1.08554	2
FBgn0004919	0.731294	1.1833	5.53877	0.0864372	0.05693	0.553978	0.129952	0.457778	2.10655	1.29974	0.293657	2.33051	2
FBgn0005391	0	0.0131939	0.405215	8.35352e-152	1.0518e-235	0	0	0.375806	0.505691	0.709943	0.0867541	0.710431	2
FBgn0051816	0.0576688	1.96631	12.4202	0.0613425	0.0813897	0	0	0	0.548499	0.571865	0.330538	1.02286	2
FBgn0032911	0.670912	0.676341	0.753648	0.491215	0.183094	0.756159	0.340458	0.430178	1.107	0.697863	0.462686	1.31075	2
FBgn0033791	0.256471	0.0737003	0.0786676	0.0183031	0.082801	0.0477515	0.00678464	0.360946	0.937401	1.09261	0.130721	0.349614	2
FBgn0051646	0.250178	0.30208	0.719668	0.12002	0.3903	0.426556	0.194136	0.279064	0.604196	0.985571	0.397401	1.32521	2
FBgn0004666	0.0283457	0.0918061	0.624721	0.0302797	0.199773	0.155868	0.00501823	0.188349	0.739387	2.04695	0.29997	1.58647	2
FBgn0034069	0.270454	0.205941	0.85686	0.0442589	0.117446	0.602371	0.0181971	0.318413	1.18911	2.47562	0.998849	1.46271	2
FBgn0262141	0.277497	0.250367	0.928389	0.11807	0.213778	0	0.194178	0.0668026	0.685747	1.10071	0.0770452	0.989362	2
FBgn0036485	0.820365	0.991717	2.18158	0.250736	0.180983	0.984498	0.338655	0.487322	0.656943	0.716149	1.1667	1.44917	2
FBgn0043021	2.84837	0	0	0	0	0	0	0	0.921186	0	0	2.83573	2
FBgn0031753	0.295424	0.974804	3.83874	0.291798	0.178689	0.513228	0.184574	0.457188	0.713609	1.46477	0.584581	1.16343	2
FBgn0053547	0.427924	0.554117	2.04424	0.133632	0.089266	0.908892	0.390443	0.429162	0.956166	1.55076	0.543654	2.96468	2
FBgn0085413	0.464416	0.526694	1.46568	0.0220177	0.269817	0.827057	0.412264	0.293762	0.873542	1.564	0.502712	1.30626	2
FBgn0083963	0.337627	0.29355	0.943284	0.176836	0.19241	0.596641	0.145197	0.134037	0.950358	1.57257	0.342822	1.36374	2
FBgn0262437	0	0	0	0	0	0	0	0	4.89117	0	0	6.81856	2
FBgn0262433	0	0	0	0	0	0	0	0	7.3594	0	0	14.4887	2
FBgn0035957	0.826852	2.24687	11.8483	0.137965	0.0915263	0.300435	0.226897	0.156118	0.548276	0.321544	0.232315	0.252986	2
FBgn0038606	0.523891	0.287773	0.487181	0.133793	0.11296	0.396865	0.137188	0.193097	0.562482	0.652502	0.298373	0.974453	2
FBgn0038592	0.128994	0.0827627	0.213531	0	0.0606841	0.124497	0.012634	0.0239234	0.57936	1.49234	0.0403012	1.88664	2
FBgn0031716	0.212761	0.63239	0.819767	0.209827	0.295705	0.804509	0.180652	0.220431	0.544024	2.15243	0.429185	1.80218	2
FBgn0002937	0.379603	0.337575	0.774701	0.0781586	0.114765	0.302973	0.137661	0.47846	3.87037	0.0463505	1.50025	6.40883	2
FBgn0052183	0.324454	0.411649	1.60964	0.28526	0.195922	0.520222	0.265061	0.452534	0.665672	1.71277	0.622435	1.3536	2
FBgn0035504	0.344152	0.405447	0.649351	0.214677	0.139953	0.453342	0.35635	0.423315	0.783253	0.209951	0.572902	1.11838	2
FBgn0259213	0.193943	0.25231	0.956849	0.140025	0.0752869	0.251014	0.151301	0.472814	2.05862	2.21127	0.811128	3.37392	2
FBgn0261085	0.0733816	0.0195766	0.333034	0.0212998	0.248731	0.0399598	0.169255	0.0451727	0.538076	0.683864	0.343978	0.741059	2
FBgn0029864	0.421207	0.0527296	0.837095	0.0442298	0.122203	0.554705	0.000661958	0.134049	1.13988	0.717341	0.695682	1.15364	2
FBgn0034255	0.803688	3.0558	1.82007	0.298458	1.7901e-43	0.21576	0.482052	0.0695006	0.970958	0.167907	0.213815	1.64696	2
FBgn0261046	0.126474	1.68492e-81	2.7144e-30	0	0	0.112805	0	0.427765	2.24162	2.88364	1.10714	3.24953	2
FBgn0030895	0.0197268	0.806288	0.946231	0.0601795	0.0775984	0.079599	0.17019	0.347447	1.14758	0.954147	0.971683	1.67301	2
FBgn0037115	0.169549	1.21495	5.22183	0.41731	0.388436	0.250833	0.273845	0.359705	0.687241	0.68595	0.426431	0.52845	2
FBgn0052085	0.828229	2.36252	6.73393	0.164659	0.303004	0.784839	0.267869	0.356423	1.78717	3.86904	0.390865	3.07887	2
FBgn0000114	4.33251	9.12057	28.4022	0.282111	0.15797	1.11816	0.3867	0.423439	1.35198	4.00195	0.551076	1.99469	2
FBgn0023489	0.0422538	0	0.0552201	0.0898911	0.0894511	0.207983	0.184794	0.241582	1.32845	1.15226	0.302731	1.93405	2
FBgn0036139	0.115604	0.000755693	0.263025	0.233724	0.385358	0.323771	0.0492681	0.395357	0.502565	0.626477	0.753391	0.784687	2
FBgn0262023	0	146.547	787.26	0	0.157578	0	0	6.4585e-184	1.08146	5.01607	0.0425502	4.06846	2
FBgn0031746	0.108283	0.05955	0.396233	0	0	0.125411	0.0473569	0	0.514951	0	0.10344	0.394255	2
FBgn0027589	0.15698	0.134102	0.82983	0.0935833	0.0901025	0.28806	0.0932715	0.0734927	0.362865	0.524394	0.107605	0.429158	2
FBgn0037789	0.354087	0.413798	1.04118	0.258942	0.156167	0.871449	0.367786	0.346288	0.444361	0.658361	0.126844	0.736695	2
FBgn0260446	0.296285	0.31834	0.783063	0.123911	0.0403568	0.406507	0.31895	0.489015	0.364331	0.514969	0.608295	0.421162	2
FBgn0250910	0.198767	0.411834	0.354784	0.152796	0.156374	0.513814	0.0152254	0.223013	0.461412	1.14826	0.595883	1.12708	2
FBgn0260780	0.0468084	0.0712857	0.135929	0.172351	0.0408446	0.102028	0.125977	0.39439	0.488484	0.606991	0.3316	0.557634	2
FBgn0052192	0.400599	7.5641	22.0905	0.484639	0.000341581	0.374042	0.078433	0.0251985	0.247288	1.65189	4.87174	9.7849	2
FBgn0259222	0.914896	0.337372	1.54929	0.133694	0.135309	0.850321	0.231494	0.382954	0.248705	0.729963	0.281703	2.90664	2
FBgn0085401	0.857518	0.748677	0.151974	0.047866	0.0447905	0.204633	0.0992294	0.155304	0.329034	0.62942	0.24371	0.493746	2
FBgn0035477	0.232728	0.268462	0.545977	0.132834	0.0560778	0.512782	0.143984	0.143479	0.467898	0.788036	0.265699	0.696779	2
FBgn0010329	0.260415	0.308584	0.450803	0.158557	0.0619614	0.599604	0.197485	0.445323	0.347693	0.571998	0.426463	0.593841	2
FBgn0000529	0.0979253	0.0841894	0.430355	0.0387161	0.0983281	0.157324	0	0	0.263041	0.617747	0.09313	0.994818	2
FBgn0085282	4.86219	32.3289	151.946	0.133668	0.467623	0.225039	0.0947697	0.394739	0.286919	1.14708	0.380271	1.64486	2
FBgn0019809	0.419557	0.199433	0.969827	0.0128036	0.071	0.0886333	0.0670266	0.218726	0.360636	1.24889	0.24902	1.52286	2
FBgn0031305	1.24037e-08	0.215328	9.74699e-54	6.40896e-54	1.28962e-119	3.60972e-76	6.79897e-31	0.104295	0.270053	0.558285	0.412587	0.583243	2
FBgn0034539	0.132869	0.147348	0.451059	0.0284172	0.00274174	1.61813e-37	0.0346496	0.047654	0.0753918	0.550411	0.063268	0.889607	2
FBgn0052553	0	0	0	0	0.0286216	0	0	0	0.235749	0.603309	0.101145	0.617157	2
FBgn0037042	0.455417	1.00431	2.13157	0.117123	0.182586	0.181374	0.0751887	0.0633471	0.451204	0.846767	0.380668	0.925697	2
FBgn0036319	0.115641	0.182816	1.07741	0.0152354	0.00945089	0.992663	0.404129	0.435228	0.272072	1.72641	0.543709	2.02894	2
FBgn0024232	0.571693	0.322979	0.817682	0.0234803	0.0246541	0.788555	0.199468	0.0133745	0.490108	0.704278	0.125491	0.745563	2
FBgn0261613	0.508103	0.863136	1.41338	0.158232	0.0770527	0.610361	0.236149	0.0911106	0.42362	1.01516	0.175126	0.905189	2
FBgn0030961	0.181125	0.230235	0.522484	0.115076	0.127439	0.416314	0.195237	0.172715	0.410662	0.610505	0.365726	0.48839	2
FBgn0263557	10.7189	0	3.97e-22	0	0	0	4.06e-107	0	0	0	9.06851	16.8821	2
FBgn0004431	0.097814	7.53093	22.6514	0	0.069024	0	0	0.23547	0.155054	0.48498	0.560636	0.76315	2
FBgn0261016	0.076684	0.144105	0.554113	0.423703	0.390194	0.350228	0.380846	0.372694	0.30388	0.486063	0.539865	0.520077	2
FBgn0086049	0	18.4722	0	0	0	0	0	0	0	0	31.2079	26.0129	2
FBgn0262282	3.01e-43	0	0	0	0	0	0	0	0	0	9.48505	9.1214	2
FBgn0262262	0.470039	1.03398	6.38849	0.499981	0	0	0	0	0	0	0.898033	1.46691	2
FBgn0038248	0.897727	5.83955	33.2429	0.140412	0.180182	0.042611	0.232622	0.122629	0.488729	0.0924356	0.411333	0.741367	2
FBgn0263086	0	0	0	0	0	0	0	0	0	0	0	2.40803	2
FBgn0032800	0.618243	0.33748	0.377188	0.109139	0.00521547	0.194963	0.0884627	0.237303	0.432172	0.278257	0.486808	1.21962	2
FBgn0011987	54.206	39.1697	22.794	0	0	0	0	0	0	0	1.33445e-21	33.2222	2
FBgn0031473	1.57274	0.128392	0.401993	0.0764458	0.0250359	0.257631	0.238869	0.232324	0.35938	0.401351	0.157571	0.811809	2
FBgn0262339	0	0	0	0	0	0	0	0	0	0	0	9.29455	2
FBgn0086076	3.99747	0	0	0	0	0	7.87192e-05	0	0	0	0	3.43901	2
FBgn0050449	0	0	0	0	0	0	0	0	0	0	0	25.0872	2
FBgn0085314	0	0	1.27994e-07	7.76315e-06	4.81393e-07	0	4.8166e-07	2.29686e-05	0.024125	0	7.73528e-07	0.690877	2
FBgn0035255	0.101749	0	0.0797835	0	0	0.0294608	0	0.122472	0.26202	0.252246	0.121498	0.714467	2
FBgn0085371	0.0234872	0	0.03879	0.0384367	0.206497	0.0891177	0.14394	0.201587	0.304223	0.119432	0.323011	0.508889	2
FBgn0052057	0.722176	0.00282997	0.607604	0.0302268	0.0111464	0.449174	0.00193673	0.236292	0.313393	0.322313	0.0070789	1.12838	2
FBgn0262214	0	0	9.10455e-155	0	0	0	0	0	0	0	0	4.63318	2
FBgn0051202	0	0.107503	0.30487	3.60704e-92	0.175344	0	0.115782	0.268527	0.452161	0.272642	0.259341	0.939506	2
FBgn0052761	0	0	0	0	0	0	0	0	0	0	0	64.1197	2
FBgn0051807	0.442912	0.450657	5.34514	0.208798	0.0585444	0.7681	0.00164083	0.0646671	0.0243251	0.215203	0.265034	0.590422	2
FBgn0031239	0.145388	0.233958	0.605099	0.0617897	0.0566478	0.244845	0.164731	0.304655	0.442518	0.002896	0.347695	2.09139	2
FBgn0027494	1.81444	6.11074	7.96545	0	0.0965417	0.102984	0	0.0665088	0.184064	0	3.41616e-28	0.666625	2
FBgn0031104	0.136537	0.850998	2.09365	0.193647	0.192699	0.0527112	0.039809	0.109563	0.240487	0.451318	0.478246	0.757526	2
FBgn0036224	1.71199	6.61643	14.5658	0	0	1.87705e-92	0	0.0689589	0.00369595	0	0.0178115	0.605999	2
FBgn0032484	0.105474	0.155115	0.301594	0.178366	0.0402114	0.434693	0.188732	0.129996	0.322839	0.236096	0.234707	0.53869	2
FBgn0000357	0.475284	0.190555	0.496906	0.0421301	0.167696	0.275231	0.277149	0.190694	0.209283	0.392758	0.227014	0.535628	2
FBgn0031526	0.740411	7.13837	20.1637	0.260363	4.07471e-43	0.0497754	0.24994	0.115363	0.287187	0.0920017	1.25795e-71	0.526286	2
FBgn0040390	0.144843	0.0863347	0.241733	0.0799544	0.0461205	0.251578	0.0418118	0.170364	0.424705	0.00820152	0.176677	0.938454	2
FBgn0030247	0.285797	5.60858	21.6708	0	0	0	0	0.0724216	0.158963	0	0.215538	0.563319	2
FBgn0036679	0.0420531	0.138761	1.36295	0	0.118701	0.146114	0.0735664	0	0.0888832	0	0.0401723	0.743694	2
FBgn0086913	0.0325295	0.0166622	0.0205117	0.0400227	0.0230882	0.0356567	0.0021069	0.00161293	0.0944198	0.00446748	0.0526342	1.24058	2
FBgn0038946	0	0	0.0720225	0	0	0.0531899	0.0269886	0.055279	0.271876	0	0.0781475	0.572762	2
FBgn0033145	0	0	0	0	0	0	0	0	0	0	0	0.572784	2
FBgn0052657	0.928071	54.9251	72.3926	0.363326	0	0.107224	0	0.113765	0.219702	0	0.318969	1.91183	2
FBgn0052382	0	0	0.792319	1.46036e-125	0	0	0	7.22321e-263	0	0	0	0.574065	2
FBgn0052383	0	0	0.706472	0	0	0	4.10763e-262	0	0	0	0	1.86579	2
FBgn0036225	23.7793	22.7295	11.8497	0	2.21822e-270	3.48055	0.306095	0.0252038	0.386199	0.320789	0.0997727	0.757856	2
FBgn0038165	0.853619	0.467579	3.17169	0.129312	0.0263246	1.17487	0.096999	0.166102	0.025125	0.264882	0.0359884	1.02706	2
FBgn0261928	0.316766	0.502431	1.51655	0.0807248	0.0511969	0.27574	0.166449	0.16193	0.448068	0.0235505	0.187835	0.661335	2
FBgn0053202	0.431294	0.306071	0.744746	0.286874	0.0861412	0.770594	0.373528	0.127109	0.37443	0.467717	0.19084	0.64256	2
FBgn0259146	0.184757	0.186172	0.438804	0.118844	0.0586695	0.358042	0.169685	0.111193	0.39111	0.458031	0.158845	0.630532	2
FBgn0262381	0	0	0	0	0	8.36785	0	0	0	0	0	7.51603	2
FBgn0037014	0.0404341	0.0762397	0.072469	0.12903	0.195654	0.0468297	0.0656818	0.139054	0.433411	0.45824	0.154503	0.787171	2
FBgn0050201	0	0	0	0	0	0	0	0	0	0	0	15.1596	2
FBgn0263455	0.16768	0.228548	0.881246	0.0122474	0.071368	0.0275622	0.132881	0.194155	0.442386	0.237628	0.374148	0.522605	2
FBgn0032367	0	0	0.133055	0	0	0.442187	0	0	0	0	0.243148	0.661956	2
FBgn0037100	1.29688	0.806086	0.81791	0.0418029	0.0138661	0.0227577	0.0337762	0.1853	0.104536	0.259812	0.31411	0.670268	2
FBgn0262406	0	0	0	0	0	0	0	0	0	0	0	71.4226	2
FBgn0260874	0.0456887	0.207806	0.582271	0.133648	0.176959	0.0726087	0.306353	0.375177	0.278077	0.248673	0.0460195	0.941933	2
FBgn0053513	0.484223	0.253685	0.903277	0.0805457	0.259331	1.08834	0.0159835	0.0482854	0.489179	0.119161	0.133115	0.51808	2
FBgn0036111	46.8989	42.2037	65.4596	132.739	176.869	103.282	133.497	156.866	164.986	165.103	145.237	169.991	3
FBgn0035871	55.0943	67.2421	79.1741	65.426	75.0073	70.9119	63.3787	61.2255	68.8216	72.3354	65.9648	66.556	3
FBgn0052594	4.54713	8.01865	13.3502	9.00959	10.3496	5.82794	5.14882	7.773	9.72522	15.4531	5.92016	8.97283	3
FBgn0039942	5.9679	9.90909	12.7951	18.2237	29.1849	14.6853	16.8737	24.5634	26.5413	27.9084	24.0984	25.8348	3
FBgn0031979	12.9194	18.5651	23.2472	23.5016	25.6057	11.514	19.7903	30.9219	21.3052	30.8421	25.1374	29.6811	3
FBgn0031973	9.07503	10.5436	16.2655	13.2142	15.839	8.67708	7.18968	10.2866	16.1807	11.826	8.89964	12.0471	3
FBgn0260855	91.9352	75.1681	62.0234	42.6651	84.9841	46.9851	43.5466	45.4845	67.2659	90.1588	45.8811	66.1936	3
FBgn0260856	27.022	21.9671	22.3083	25.9128	30.6318	25.5155	24.9661	23.73	26.0929	35.3774	23.4073	27.7329	3
FBgn0032803	5.42196	3.81851	13.5497	5.66437	18.8571	1.71406	1.92362	4.46179	21.0048	120.562	3.14468	24.5469	3
FBgn0025682	126.55	46.8903	101.523	57.9441	107.364	70.2549	60.262	60.851	74.0701	104.898	59.7681	71.1848	3
FBgn0025684	19.6408	29.4195	15.0514	13.8991	18.5596	14.0393	11.6369	12.4513	13.6383	17.334	12.6792	12.654	3
FBgn0037973	139.081	141.129	44.7504	26.8159	53.1	17.9457	29.3738	31.5009	34.6327	49.524	22.4913	42.4904	3
FBgn0259733	7.55545	39.688	43.3693	20.8167	105.904	29.7916	32.0247	45.6462	74.7698	476.435	75.9295	87.5583	3
FBgn0259735	17.5235	14.5859	29.0839	20.0091	54.316	14.4418	13.6642	24.3507	61.3573	77.5161	30.8507	59.3115	3
FBgn0085188	36.8665	60.2318	92.2123	153.657	195.112	117.85	147.986	184.157	147.813	206.269	170.059	219.881	3
FBgn0027506	6.45829	12.2956	18.634	19.9012	26.4036	15.6185	15.8477	23.4294	22.8989	37.2026	24.0153	28.8596	3
FBgn0005612	5.63739	16.5035	59.7299	12.0026	20.5618	9.61816	7.45323	11.3945	15.4484	16.8377	12.7382	9.50733	3
FBgn0051698	6.14785e-189	529.663	409.307	0.763731	1.40261	0	0	0.616946	0.536352	2.41565	2.21967	2.0268	3
FBgn0005585	910.648	639.54	534.409	647.693	1175.54	528.655	649.739	745.072	1022.25	1420.48	867.457	1130.78	3
FBgn0053993	0.243074	0.803101	2.16257	7.4355	14.9968	0.934825	0.890083	5.9745	12.527	26.5272	6.55565	12.4226	3
FBgn0032845	5.21413	7.08565	9.50301	12.0061	12.3382	9.86205	10.5564	12.2269	12.145	12.8388	10.4492	13.1218	3
FBgn0030530	9.81973	11.5137	26.9291	48.8271	54.9764	34.5172	41.5345	48.5443	51.082	49.0049	46.9517	51.6126	3
FBgn0040382	67.2513	67.1357	93.0823	33.5486	32.6752	32.2677	18.9402	30.398	34.7731	46.0138	28.7703	29.6087	3
FBgn0037164	4.30326	4.67722	4.51674	9.29895	18.9134	6.02387	4.20856	7.48401	14.4129	17.1363	6.00436	8.84739	3
FBgn0025865	30.0042	31.8166	57.2692	66.495	84.7119	50.2366	59.289	71.7908	74.4528	88.2342	75.7296	70.8846	3
FBgn0030493	1.50296	0.571406	9.22697	8.26444	116.495	0.647416	0.512477	2.02844	32.9294	450.136	0.559695	22.4766	3
FBgn0004512	11.7951	13.6877	8.63053	3.41457	8.23016	0.789337	2.42199	3.3162	6.85017	9.22724	3.30722	6.36246	3
FBgn0003891	35.9243	42.3568	77.0215	59.842	65.2421	42.7176	42.7629	62.6518	73.9303	81.71	55.5601	58.8871	3
FBgn0020622	15.4567	12.9882	20.8958	26.5344	24.9309	20.7867	20.6486	25.7328	27.9244	26.7892	21.355	22.7139	3
FBgn0033663	765.554	371.494	523.494	710.279	748.451	514.86	523.724	500.825	857.275	935.062	709.813	618.507	3
FBgn0032399	0.0889196	0.597107	1.46308	1.18001	2.29458	0.531182	0.597652	1.6167	1.96037	2.08838	1.51556	2.65818	3
FBgn0032398	32.1631	27.2804	26.8069	30.4144	40.214	28.3622	31.3195	34.3614	31.4721	42.9823	33.0694	34.8743	3
FBgn0032820	196.346	133.518	45.1033	34.2658	49.0366	43.4188	43.4915	36.3314	59.545	73.3096	37.5762	61.3852	3
FBgn0039257	8.96172	3.46182	14.2581	12.4042	77.6648	70.1162	30.9833	6.38963	42.5079	147.774	3.91828	40.3873	3
FBgn0039265	74.6512	64.8901	66.9557	158.942	246.084	124.998	126.312	151.116	180.255	206.379	148.62	172.274	3
FBgn0010501	9.6694	10.8285	16.5024	46.976	60.7953	20.7547	29.3107	42.4221	51.3669	49.0478	42.7253	46.1109	3
FBgn0027529	23.3238	22.2199	34.5553	12.8769	17.4559	10.3487	10.7335	16.5521	17.9941	22.4324	14.7414	15.7417	3
FBgn0085308	0.129691	132.055	293.402	1.04473	1.51116	0.523283	0.300228	0.766832	0.317345	2.81933	1.77935	2.22223	3
FBgn0034372	18.3618	28.6124	37.6415	30.2814	41.5336	24.8907	28.3834	33.9343	33.3001	34.2458	31.5518	33.1937	3
FBgn0036623	200.245	73.4967	69.9593	83.8126	88.1063	70.9234	73.4691	67.4774	89.8617	90.1128	78.5202	80.8399	3
FBgn0038286	14.4694	14.9755	21.9349	21.7079	32.5351	32.6639	22.213	25.8938	25.2426	31.3608	23.7667	28.1474	3
FBgn0030876	29.8689	159.94	443.822	19.9701	22.119	9.27558	8.45285	10.3185	19.4183	37.5531	8.90194	15.6792	3
FBgn0032700	4.89909	5.68053	6.97427	6.59671	7.22717	5.47456	4.82532	6.64648	7.355	8.58599	6.44362	8.1064	3
FBgn0035121	248.751	109.447	122.181	247.917	297.981	224.313	222.936	225.379	284.624	348.414	233.101	228.313	3
FBgn0032350	100.16	54.5149	103.815	71.758	218.13	28.9498	24.3442	90.8644	225	272.302	119.405	234.914	3
FBgn0029003	9.57386	13.3126	32.4511	113.292	149.628	85.5355	123.45	117.789	135.829	131.63	96.1167	154.77	3
FBgn0029002	7.80895	25.7589	67.4188	190.253	415.303	101.636	134.844	247.741	276.569	326.441	214.772	332.219	3
FBgn0035160	0.198585	1.92471	4.63526	7.52832	19.5839	1.21488	1.99584	11.7623	16.6986	27.9221	10.6715	17.982	3
FBgn0037664	4.10252	4.25581	10.7099	3.02449	15.1649	5.68712	4.63646	7.66398	21.1334	96.0821	14.1427	26.5831	3
FBgn0020389	19.8276	11.2437	20.0381	10.6994	14.0991	16.4768	11.2471	11.2041	16.9643	29.488	10.926	16.8847	3
FBgn0038704	6.99305	7.97429	17.6834	29.8628	32.8665	22.5485	29.5824	34.0539	31.8788	34.1458	28.9201	30.5266	3
FBgn0052372	6.54267	7.40723	18.7843	3.96189	7.40589	4.5539	2.80636	4.02912	6.44562	6.88481	3.14877	5.54565	3
FBgn0011282	0.83115	0.54049	1.09873	1.95675	3.11404	2.22365	2.15614	2.99241	2.90881	4.82785	2.85064	3.05432	3
FBgn0035771	90.7094	47.3336	57.7296	67.9267	73.2614	57.2221	56.6805	63.782	74.2186	97.4107	72.7213	63.4498	3
FBgn0050423	88.9322	158.022	191.285	227.369	278.298	188.388	233.655	290.036	255.259	322.141	228.72	359.661	3
FBgn0033395	18.3587	17.2846	10.0404	28.4823	33.089	26.1397	29.5733	36.726	36.4624	37.6279	30.8129	34.0409	3
FBgn0034059	27.4421	16.5697	10.8807	25.6871	42.3365	27.8337	27.2433	29.9081	32.5604	45.4231	22.6799	32.0296	3
FBgn0033649	2.80233	3.05652	6.43506	7.21879	6.34502	5.03306	3.00782	4.77976	6.54712	12.7263	3.94108	8.38693	3
FBgn0036450	12.4121	9.09865	20.5301	21.175	25.9018	19.9794	21.8394	24.2052	23.0154	26.5503	24.4747	22.7771	3
FBgn0031600	33.5467	38.9763	42.7602	47.8485	68.634	49.7039	39.6066	44.7995	45.4745	50.4991	39.2741	46.2052	3
FBgn0037933	12.4156	38.2284	71.3801	20.5798	33.5453	19.2214	18.3423	21.416	17.6318	31.4322	18.524	18.3954	3
FBgn0003328	40.8173	23.1531	38.1035	9.48613	22.8033	12.395	9.32561	7.33415	15.9144	33.9295	6.14608	10.1138	3
FBgn0039642	4.58113	8.71328	22.2325	72.6004	93.6326	34.8984	42.3125	73.9306	91.6537	94.8287	73.8859	103.12	3
FBgn0010401	0.0410632	0.151127	1.90686	3.98334	10.3441	0	0.0357528	2.77449	10.0257	14.7415	0.0274548	1.13546	3
FBgn0016660	0.426454	0.674786	2.95669	9.89724	22.9699	0.865945	0.411436	3.5793	14.0424	14.9018	0.467197	1.30617	3
FBgn0029945	0.162616	1.21988	4.97085	1.24621	1.60141	0.508083	0.563965	1.12776	1.69913	1.99866	1.10349	1.04084	3
FBgn0031894	0.391091	1.49692	4.90804	11.1841	17.1986	4.74298	6.50936	9.15157	11.7965	10.0048	8.82141	11.9877	3
FBgn0031896	3.73143	9.85324	25.9053	34.3218	42.8757	22.5486	26.6581	31.9454	34.846	47.1414	29.7882	31.7202	3
FBgn0027094	55.8209	30.7605	35.6068	85.4247	124.746	74.2843	88.8485	94.3927	99.7127	114.894	92.6646	90.1887	3
FBgn0027095	158.697	90.3766	88.118	137.812	213.267	142.547	156.753	122.317	171.828	304.845	126.431	166.876	3
FBgn0015288	859.789	898.023	640.141	1103.89	1695.46	948.469	1102.45	1594.13	1181.69	1560.89	1239.65	1324.12	3
FBgn0040087	17.1554	14.597	16.9116	20.0147	28.6641	17.9778	20.2202	23.7522	28.2485	39.7566	24.2272	26.578	3
FBgn0262260	0	0	65.503	178.243	87.7849	57.1924	45.0452	99.8348	107.28	279.386	64.6109	153.124	3
FBgn0085276	0	0	1.58623	0.744859	66.0503	0	0.102083	3.51194	32.716	57.8662	2.89871	6.55607	3
FBgn0086077	30.1495	40.2136	52.3277	249.203	656.397	18.9362	280.939	327.631	485.713	346.233	146.685	652.665	3
FBgn0024252	2.95185	4.2238	15.3389	13.865	18.1265	13.6222	11.838	15.2665	15.1677	16.6579	15.0482	17.0103	3
FBgn0032230	3.95159	11.6183	20.5463	45.6268	133.746	28.8985	43.7401	92.4021	86.0099	126.94	86.7358	146.508	3
FBgn0033421	6.47093	9.72644	13.5246	11.8267	23.0828	12.0703	13.0756	17.3379	18.6519	31.7104	17.2715	24.0317	3
FBgn0085220	110.509	142.211	60.5155	82.8368	199.194	113.613	116.737	106.804	119.158	201.831	74.1655	140.165	3
FBgn0036988	3.09826	9.42075	14.8415	7.7159	10.1434	6.83194	5.89131	7.2993	9.7849	12.1215	9.09772	8.80009	3
FBgn0026620	22.7966	31.2199	60.3439	74.7999	83.2758	46.804	65.8014	69.7758	79.4778	94.0319	70.4463	82.1048	3
FBgn0000492	2.40766	4.44424	7.17777	3.12154	3.75458	1.19299	0.404631	2.12804	2.61401	2.03155	1.03625	1.97635	3
FBgn0039189	7.89289	11.259	16.4418	19.3338	26.601	19.1699	21.1814	25.1448	21.6284	25.1664	21.4872	18.8721	3
FBgn0039450	45.5089	51.7929	32.8631	50.1047	94.9816	40.0243	46.3498	69.8369	55.7198	80.1342	60.2749	74.0795	3
FBgn0259175	42.0314	21.212	14.4495	11.6269	17.6456	15.5978	8.58042	10.9298	19.1518	10.3696	10.2648	16.0127	3
FBgn0050440	1.80911	6.14775	9.60179	33.8759	56.7609	13.7712	19.5251	39.5405	38.1388	60.5544	27.7067	57.5189	3
FBgn0036298	48.2073	28.8072	24.8123	23.6266	31.952	18.5424	18.5038	21.3565	25.3892	32.5157	21.5708	21.2968	3
FBgn0036294	4.32288	2.84975	1.81735	3.3397	4.33684	3.56081	1.69874	2.41311	3.26362	7.80064	4.60181	4.51912	3
FBgn0038324	1.18132	1.16711	2.70313	6.14068	6.51568	3.45011	4.07292	5.97247	7.45118	10.8465	5.67617	7.82661	3
FBgn0004003	21.018	13.444	53.9456	25.8061	259.669	12.3357	12.2147	33.3983	157.165	289.127	41.118	192.082	3
FBgn0002522	2.16359	1.21586	1.1533	3.95642	5.29055	2.46893	2.65877	3.5261	4.96954	5.03267	3.12651	4.37822	3
FBgn0029709	162.771	135.562	104.34	108.265	176.812	94.57	109.848	133.443	132.659	240.145	121.062	166.454	3
FBgn0031871	10.5202	15.3164	28.0324	22.9844	28.8981	21.0017	24.8571	28.6489	23.4057	32.6662	27.7747	30.5564	3
FBgn0040064	102.618	276.564	175.453	174.701	214.676	105.386	110.799	168.847	180.047	187.33	124.003	163.989	3
FBgn0030839	3.56239	1.68009	2.29141	2.90109	3.07636	2.76846	2.25204	2.6827	3.46189	3.55593	2.48875	2.45539	3
FBgn0085298	0.2349	0.651856	4.36553	1.10655	1.05232	0.00823534	0.596944	1.95049	1.81818	2.92629	0.397472	2.19479	3
FBgn0036662	22.0574	18.2239	14.7294	10.0197	15.3817	11.8755	10.8169	12.2698	10.3872	16.1525	8.91691	12.1701	3
FBgn0001225	29.5146	134.719	667.612	164.945	1184.86	370.455	209.958	470.535	586.445	1432.32	307.796	977.785	3
FBgn0261811	2.46365	3.50521	8.87413	12.1637	16.0893	9.07336	8.6777	13.9431	23.1173	27.3463	15.9141	19.0155	3
FBgn0261269	6.44926	7.02297	11.0398	26.2213	35.7386	21.3207	23.5687	28.6625	28.5081	27.5292	25.9435	28.6798	3
FBgn0039371	2.10691	1.07222	5.55622	1.37144	1.95278	1.9667	0.605126	0.681316	1.19637	1.87101	1.62216	0.817823	3
FBgn0024230	3.85335	4.87086	3.81828	2.24914	13.1447	0.654933	5.25075	12.0704	8.15805	14.2253	6.03155	12.5543	3
FBgn0024728	9.63903	13.2517	25.45	47.5123	58.3408	35.0195	45.136	52.9326	58.188	57.1604	49.8163	61.1104	3
FBgn0024238	46.8154	26.4642	37.0706	39.3227	56.2047	35.285	34.4786	35.8361	43.7775	41.1288	36.1415	51.3469	3
FBgn0086901	7.08356	9.43058	22.2106	19.3223	19.7194	12.8025	10.4861	16.5172	24.369	23.5065	13.1585	20.6053	3
FBgn0086902	12.2884	16.8107	33.2923	69.9184	72.4662	46.1713	61.9663	73.7805	83.1279	90.1917	68.2894	73.9322	3
FBgn0034126	3.46333	6.77664	16.2669	5.44427	5.85238	5.63271	3.48731	3.80147	5.87802	6.92	4.72547	6.56579	3
FBgn0034127	0.30669	2.63727	15.0216	0.52394	0.708284	0.0430545	0.121935	0.760674	0.481253	0.829432	0.417265	0.599411	3
FBgn0031464	5.76829	6.1284	11.8199	18.9481	24.5119	15.89	16.788	20.3858	26.0975	32.2733	23.9657	20.6834	3
FBgn0031681	11.3439	22.0821	26.7908	29.6155	48.5551	24.6133	25.8416	31.8443	37.002	49.0866	28.6497	39.7855	3
FBgn0015924	22.6277	45.3446	56.7645	24.9003	31.0184	19.7188	25.8652	30.2522	25.6495	37.3218	25.6654	31.5056	3
FBgn0030159	2.54311	9.75372	11.3297	44.1563	112.679	19.6357	21.1877	50.4629	114.908	208.406	59.1369	129.476	3
FBgn0030158	8.43382	7.58812	32.3634	1.23811	20.1282	26.1668	5.72992	4.55571	5.3798	62.7443	3.89455	12.9355	3
FBgn0031150	3.72307	3.50429	5.35348	9.21866	11.9553	9.34036	7.81534	10.5398	11.9081	12.5305	11.035	13.9952	3
FBgn0011592	2.71813	4.00273	11.3794	18.9141	46.0071	13.9006	15.4189	24.5575	42.7521	57.7552	29.5909	43.743	3
FBgn0033683	80.9989	214.058	142.993	102.577	195.134	74.2824	69.2035	114.122	112.465	149.839	75.3938	117.79	3
FBgn0036417	0.25196	0.295603	9.83442	1.14351	16.8316	0.0389083	0.044077	0.828949	8.48515	47.6385	0.587783	8.21269	3
FBgn0051849	2.11321	1.78266	1.20628	3.03422	4.75688	1.87257	3.00277	3.19834	3.52772	4.06962	3.03265	3.2448	3
FBgn0045064	10.2032	14.9287	75.2916	7.03819	11.94	6.62819	8.11246	8.86397	9.48437	19.7195	8.40787	11.6685	3
FBgn0032880	48.8889	46.8203	60.1724	78.7154	94.5504	65.7536	71.8932	78.95	80.9647	94.264	76.3675	73.8778	3
FBgn0004574	27.4936	30.5262	44.8957	29.0851	43.01	29.7165	22.7608	31.7892	37.6134	40.4598	31.417	37.0336	3
FBgn0250791	37.3945	34.8764	58.6498	44.9658	49.4512	49.1802	43.6755	39.595	46.9502	56.6738	42.3802	45.0968	3
FBgn0028582	19.0421	37.1583	100.756	36.5661	59.7297	32.6122	39.9382	49.3692	42.7308	65.9189	43.957	55.8139	3
FBgn0086736	20.2425	20.5619	28.5	31.2282	37.6963	24.8732	26.277	31.1375	35.0116	36.3127	31.498	33.3606	3
FBgn0261705	0.159127	0.300648	0.667157	1.10361	3.44142	1.16139	0.319522	0.817509	2.06386	2.10764	0.240293	0.527329	3
FBgn0031142	0.200978	1.56085	3.88769	0.733511	1.01509	0.804106	0.769163	0.738668	1.16031	1.17767	0.944934	1.14629	3
FBgn0034312	11.6009	19.4491	34.2816	12.0636	19.4884	12.3329	11.6048	17.9234	17.3604	19.3162	15.6927	17.9896	3
FBgn0038151	24.8778	24.6977	7.06913	10.0917	15.1451	2.57458	2.59253	6.27516	10.7253	10.7595	4.58838	7.24032	3
FBgn0026189	10.169	14.9795	32.974	48.9144	61.8027	35.2641	36.9539	50.9195	62.1291	73.9908	56.5302	57.0529	3
FBgn0051477	4.28068	12.2406	12.7208	11.5852	14.7763	7.17827	9.87006	12.8736	10.9567	16.644	7.77885	11.7173	3
FBgn0032949	155.201	324.256	411.188	255.218	356.378	196.054	188.652	243.146	231.896	264.567	223.45	298.008	3
FBgn0086039	20.0348	160.639	38.4644	137.695	239.028	123.168	40.5016	52.8112	35.9132	330.563	87.9696	63.8484	3
FBgn0020445	1.26947	2.48269	17.0996	1.84876	5.39124	2.03729	2.04447	1.28062	5.28785	22.0773	0.94468	5.71011	3
FBgn0053113	618.463	447.937	277.484	370.268	504.213	439.983	329.008	272.544	387.226	370.655	295.591	357.085	3
FBgn0011829	0.836853	3.35547	2.07072	1.2029	1.50387	0.866152	0.702811	1.49834	4.65534	7.46383	1.46807	1.79225	3
FBgn0034974	4.37118	1.13082	4.94231	8.87442	44.7913	41.9333	12.6549	5.29164	21.9258	35.9924	2.55386	18.0812	3
FBgn0042174	41.9735	62.1081	144.951	111.311	186.918	91.1783	89.0998	122.769	136.142	181.588	114.269	129.623	3
FBgn0262737	14.8504	23.6933	73.606	112.442	145.556	61.3516	84.1726	141.047	148.639	171.178	129.946	190.886	3
FBgn0000639	0.0437684	2015.61	7445.57	8.36536	13.339	0.0316849	0.0191418	2.16659	6.95058	202.847	9.01492	23.7954	3
FBgn0037472	9.27807	22.4435	47.8308	36.2233	71.7262	34.1116	22.348	40.1963	65.6388	71.4801	47.7874	73.6516	3
FBgn0011225	31.7407	37.5459	66.6557	45.6001	68.8014	35.2814	41.5893	44.0456	65.2379	88.9283	39.4881	58.1747	3
FBgn0039494	30.9016	29.895	31.8926	5.65137	12.6307	7.87418	4.89983	2.62016	7.93532	14.5305	1.89014	6.17044	3
FBgn0038366	8.16067	32.3131	41.1668	2.94564	5.88467	1.3614	1.33005	1.84056	3.93781	7.79406	1.67338	8.01048	3
FBgn0038360	29.3148	27.9676	32.4223	25.055	34.356	24.5759	19.7612	22.3601	26.6142	32.9499	22.0598	24.5298	3
FBgn0002945	2.41759	4.17592	12.2252	38.7045	45.6562	18.2296	20.6301	33.7304	54.2776	63.9249	29.1177	38.5516	3
FBgn0036436	1.0055	6.61869	12.3473	19.4675	146.368	7.19502	11.904	54.4598	146.629	381.24	68.0915	295.473	3
FBgn0069913	0.085049	2.07525	12.9242	1.26965	0.800214	0.532933	0.214723	0.959014	0.757785	1.40563	0.529961	0.53676	3
[truncated: 8,894 more rows]
